# Supplementary material for: Isolation and Structural Elucidation of New Amphidinol Analogues from Amphidinium carterae Cultivated in a Pilot-Scale Photobioreactor
Source: MDPI journal article supplement (doi:10.3390/md19080432), 2021-07-29
Supplement: s1 [file s1]

# SUPPLEMENTARY MATERIAL

## Isolation and structural elucidation of new amphidinol analogues from *Amphidinium carterae* cultivated in a pilot scale photobioreactor

**Adrián Morales-Amador<sup>1,2</sup>, Alejandro Molina-Miras<sup>3,4</sup>, Lorenzo López-Rosales<sup>3,4</sup>, Asterio Sánchez-Mirón<sup>3,4</sup>, Francisco García-Camacho<sup>3,4</sup>, María L. Souto<sup>1,2\*</sup> and José J. Fernández<sup>1,2\*</sup>**

<sup>1</sup> Instituto Universitario de Bio-Organica Antonio González (IUBO AG), Universidad de La Laguna (ULL), Avda. Astrofísico F. Sánchez 2, 38206 La Laguna, Tenerife, Spain

<sup>2</sup> Departamento de Química Orgánica, Universidad de La Laguna (ULL), Avda. Astrofísico F. Sánchez 2, 38206 La Laguna, Tenerife, Spain

<sup>3</sup> Chemical Engineering Department, University of Almería, 04120 Almería, Spain

<sup>4</sup> Research Center CIAIMBITAL, University of Almería, 04120 Almería, Spain

# Table of contents

|                   | Description                                                                                                                                                                                                                                     | Page |
|-------------------|-------------------------------------------------------------------------------------------------------------------------------------------------------------------------------------------------------------------------------------------------|------|
| <b>Scheme S1</b>  | Production of new amphidinol analogues by the marine microalga <i>Amphidinium carterae</i> grown in a pilot-scale LED-illuminated photobioreactor.                                                                                              | S4   |
| <b>Scheme S2</b>  | Isolation procedure for new amphidinol analogues.                                                                                                                                                                                               | S5   |
| <b>Table S1</b>   | <sup>1</sup> H and <sup>13</sup> C NMR data (600 MHz, CD <sub>3</sub> OD) for amphidinols 24, 25 and 27.                                                                                                                                        | S6   |
| <b>Figure S1</b>  | <sup>1</sup> H NMR spectrum (600 MHz, CD <sub>3</sub> OD) for amphidinol 24.                                                                                                                                                                    | S7   |
| <b>Figure S2</b>  | COSY spectrum (600 MHz, CD <sub>3</sub> OD) for amphidinol 24.                                                                                                                                                                                  | S8   |
| <b>Figure S3</b>  | HSQC <sub>ed</sub> spectrum (600 MHz, CD <sub>3</sub> OD) for amphidinol 24.                                                                                                                                                                    | S9   |
| <b>Figure S4</b>  | HSQC-TOCSY spectrum (600 MHz, CD <sub>3</sub> OD) for amphidinol 24.                                                                                                                                                                            | S10  |
| <b>Figure S5</b>  | HMBC spectrum (600 MHz, CD <sub>3</sub> OD) for amphidinol 24.                                                                                                                                                                                  | S11  |
| <b>Figure S6</b>  | H2BC spectrum (600 MHz, CD <sub>3</sub> OD) for amphidinol 24.                                                                                                                                                                                  | S12  |
| <b>Figure S7</b>  | T-ROESY spectrum (600 MHz, CD <sub>3</sub> OD) for amphidinol 24.                                                                                                                                                                               | S13  |
| <b>Figure S8</b>  | 1D-NOESY spectral (600 MHz, CD <sub>3</sub> OD) for amphidinol 24.                                                                                                                                                                              | S14  |
| <b>Figure S9</b>  | <sup>1</sup> H NMR spectrum (600 MHz, CD <sub>3</sub> OD-C <sub>5</sub> D <sub>5</sub> N 2:1) for amphidinol 24.                                                                                                                                | S15  |
| <b>Figure S10</b> | HSQC <sub>ed</sub> spectrum (600 MHz, CD <sub>3</sub> OD-C <sub>5</sub> D <sub>5</sub> N 2:1) for amphidinol 24.                                                                                                                                | S16  |
| <b>Figure S11</b> | HSQC-TOCSY spectrum (600 MHz, CD <sub>3</sub> OD-C <sub>5</sub> D <sub>5</sub> N 2:1) for amphidinol 24.                                                                                                                                        | S17  |
| <b>Figure S12</b> | HMBC spectrum (600 MHz, CD <sub>3</sub> OD-C <sub>5</sub> D <sub>5</sub> N 2:1) for amphidinol 24.                                                                                                                                              | S18  |
| <b>Figure S13</b> | H2BC spectrum (600 MHz, CD <sub>3</sub> OD-C <sub>5</sub> D <sub>5</sub> N 2:1) for amphidinol 24.                                                                                                                                              | S19  |
| <b>Figure S14</b> | T-ROESY spectrum (600 MHz, CD <sub>3</sub> OD-C <sub>5</sub> D <sub>5</sub> N 2:1) for amphidinol 24.                                                                                                                                           | S20  |
| <b>Figure S15</b> | 1D-NOESY spectrum (600 MHz, CD <sub>3</sub> OD-C <sub>5</sub> D <sub>5</sub> N 2:1) for amphidinol 24.                                                                                                                                          | S21  |
| <b>Table S2</b>   | <sup>1</sup> H and <sup>13</sup> C NMR data comparison for carbons C-30 → C-51 in CD <sub>3</sub> OD-C <sub>5</sub> D <sub>5</sub> N 2:1 for amphidinol 24 <i>versus</i> related synthetic fragments 4a and 4b reported by Wakamiya et al [22]. | S22  |
| <b>Figure S16</b> | HRESIMS spectrum for amphidinol 24.                                                                                                                                                                                                             | S23  |
| <b>Figure S17</b> | Main MS/MS fragments observed for amphidinol 24.                                                                                                                                                                                                | S24  |
| <b>Figure S18</b> | <sup>1</sup> H NMR spectrum (600 MHz, CD <sub>3</sub> OD) for amphidinol 25.                                                                                                                                                                    | S25  |
| <b>Figure S19</b> | COSY spectrum (600 MHz, CD <sub>3</sub> OD) for amphidinol 25.                                                                                                                                                                                  | S26  |
| <b>Figure S20</b> | HSQC <sub>ed</sub> spectrum (600 MHz, CD <sub>3</sub> OD) for amphidinol 25.                                                                                                                                                                    | S27  |
| <b>Figure S21</b> | HSQC-TOCSY spectrum (600 MHz, CD <sub>3</sub> OD) for amphidinol 25.                                                                                                                                                                            | S28  |

|            |                                                                                                     |     |
|------------|-----------------------------------------------------------------------------------------------------|-----|
| Figure S22 | HMBC spectrum (600 MHz, CD <sub>3</sub> OD) for amphidinol 25.                                      | S29 |
| Figure S23 | HRESIMS spectrum for amphidinol 25.                                                                 | S30 |
| Figure S24 | Main MS/MS fragments observed for amphidinol 25.                                                    | S31 |
| Figure S25 | <sup>1</sup> H NMR spectrum (600 MHz, CD <sub>3</sub> OD) for amphidinol 26.                        | S32 |
| Figure S26 | COSY spectrum (600 MHz, CD <sub>3</sub> OD) for amphidinol 26.                                      | S33 |
| Figure S27 | HSQC <sub>ed</sub> spectrum (600 MHz, CD <sub>3</sub> OD) for amphidinol 26.                        | S34 |
| Figure S28 | HSQC-TOCSY spectrum (600 MHz, CD <sub>3</sub> OD) for amphidinol 26.                                | S35 |
| Figure S29 | HMBC spectrum (600 MHz, CD <sub>3</sub> OD) for amphidinol 26.                                      | S36 |
| Figure S30 | H2BC spectrum (600 MHz, CD <sub>3</sub> OD) for amphidinol 26.                                      | S37 |
| Figure S31 | T-ROESY spectrum (600 MHz, CD <sub>3</sub> OD) for amphidinol 26.                                   | S38 |
| Figure S32 | HRESIMS spectrum for amphidinol 26.                                                                 | S39 |
| Figure S33 | Amphidinol 26 conversion from aldehyde to carboxylic acid at C-54 observed by ESI-HRMS.             | S40 |
| Figure S34 | Amphidinol 26 single mass composition analysis for aldehyde and carboxylic states.                  | S41 |
| Figure S35 | Main MS/MS fragments observed for amphidinol 26.                                                    | S42 |
| Figure S36 | <sup>1</sup> H NMR and HSQC <sub>ed</sub> spectra (600 MHz, CD <sub>3</sub> OD) for luteophanol D.  | S43 |
| Figure S37 | HRESIMS spectrum for luteophanol D.                                                                 | S44 |
| Figure S38 | <sup>1</sup> H NMR and HSQC <sub>ed</sub> spectra (600 MHz, CD <sub>3</sub> OD) for amphidinol 20B. | S45 |
| Figure S39 | HRESIMS spectrum for amphidinol 20B.                                                                | S46 |

**Scheme S1.** Production of new amphidinol analogues by the marine microalga *Amphidinium carterae* grown in a pilot-scale LED-illuminated photobioreactor.

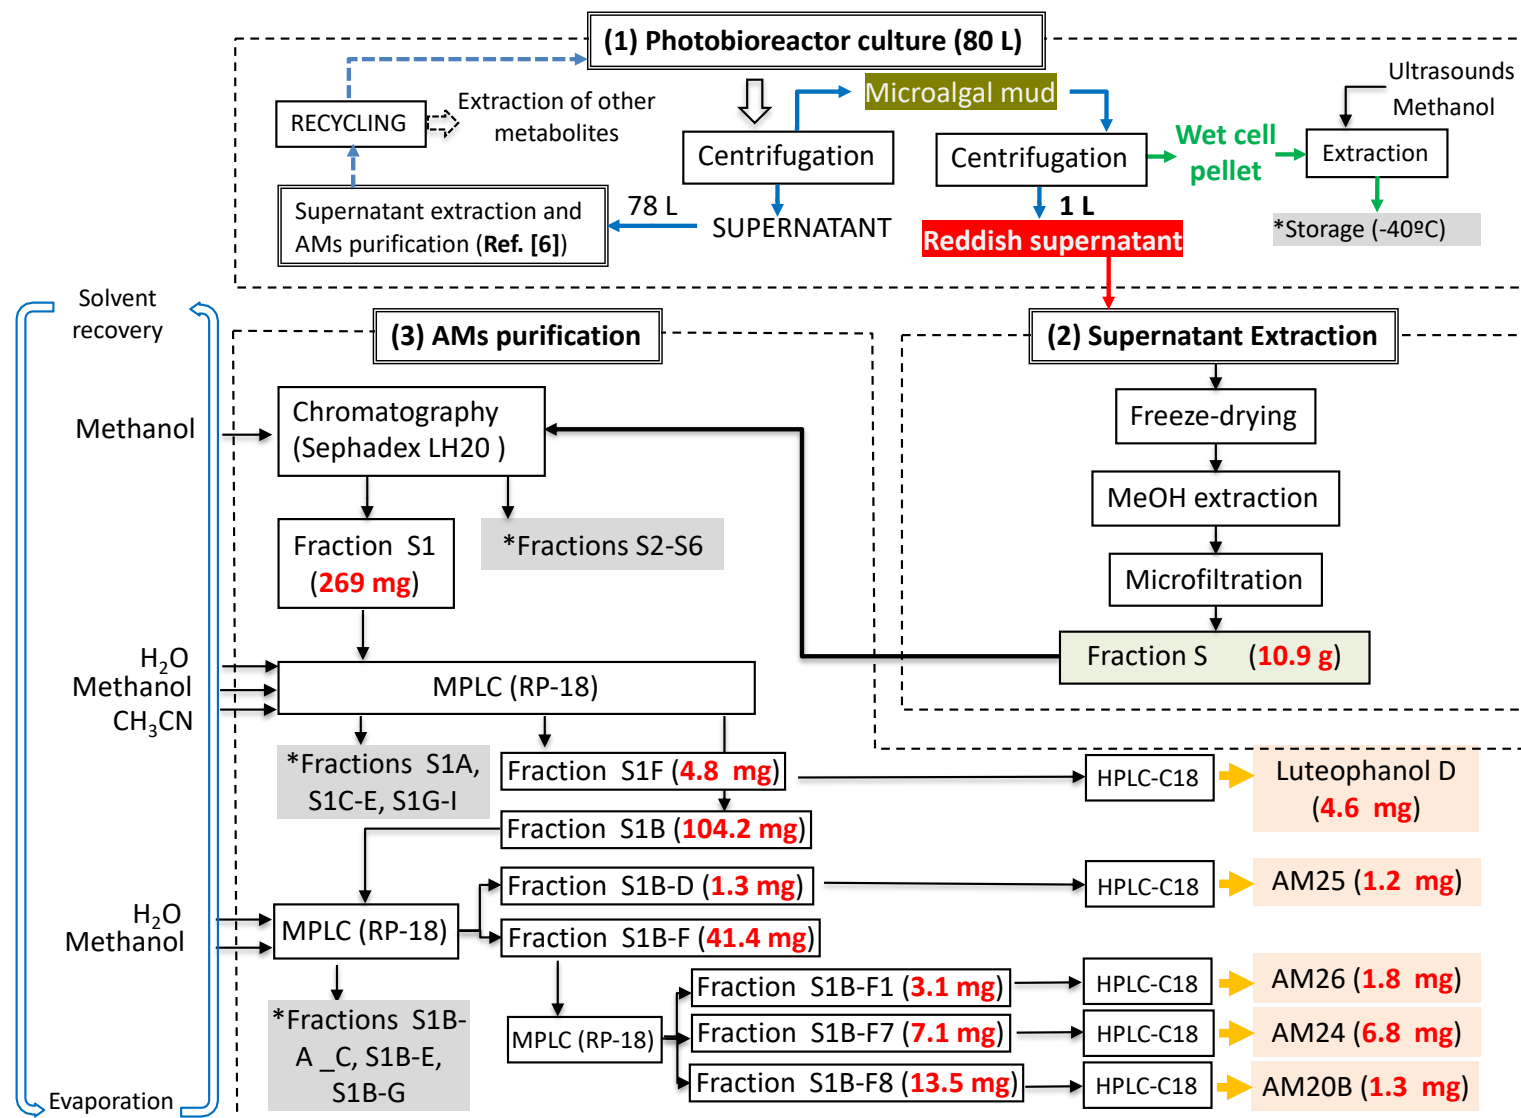



Scheme S2. Isolation procedure for new amphidinol analogues.

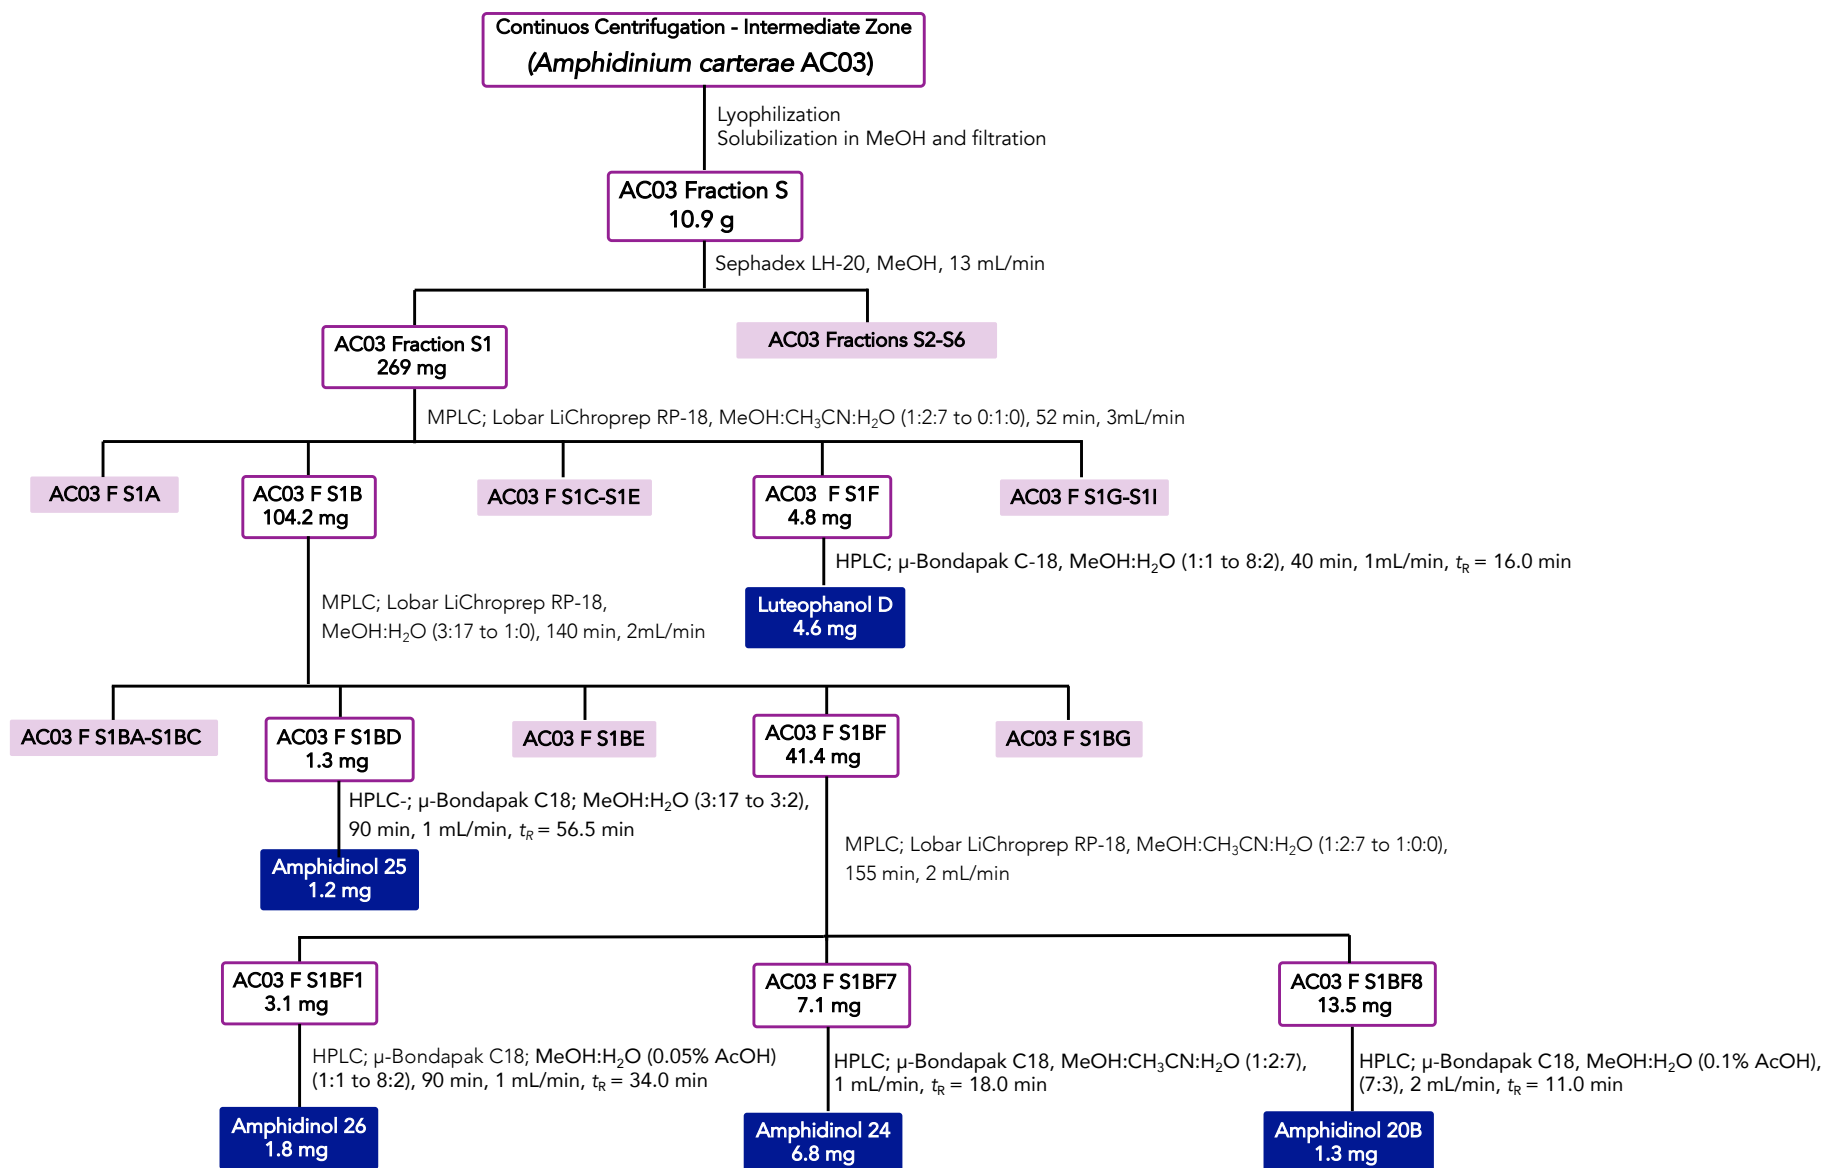

**Table S1.**  $^1\text{H}$  and  $^{13}\text{C}$ -NMR data (600 MHz,  $\text{CD}_3\text{OD}$ ) for amphidinols 24, 25 and 27.

| #  |                       | Amphidinol 24           |                       | Amphidinol 25           |                       | Amphidinol 27           |                  | #  |                       | Amphidinol 24           |                       | Amphidinol 25           |                       | Amphidinol 27           |                  |                        |            |                        |            |                        |            |
|----|-----------------------|-------------------------|-----------------------|-------------------------|-----------------------|-------------------------|------------------|----|-----------------------|-------------------------|-----------------------|-------------------------|-----------------------|-------------------------|------------------|------------------------|------------|------------------------|------------|------------------------|------------|
|    |                       | $\delta\text{C}$ , type | $\delta\text{H}$      | $\delta\text{C}$ , type | $\delta\text{H}$      | $\delta\text{C}$ , type | $\delta\text{H}$ |    |                       | $\delta\text{C}$ , type | $\delta\text{H}$      | $\delta\text{C}$ , type | $\delta\text{H}$      | $\delta\text{C}$ , type | $\delta\text{H}$ |                        |            |                        |            |                        |            |
| 1  | 67.0, CH <sub>2</sub> | 3.43; 3.48              | 67.1, CH <sub>2</sub> | 3.43; 3.47              | 67.1, CH <sub>2</sub> | 3.43; 3.48              |                  | 25 | 71.1, CH              | 3.86                    | 71.1, CH              | 3.86                    | 70.1, CH              | 3.87                    | 53               | 37.6, CH <sub>2</sub>  | 1.60; 1.64 | 37.6, CH <sub>2</sub>  | 1.62 (2H)  | 38.8, CH               | 2.16 (2H)  |
| 2  | 73.0, CH              | 3.58                    | 73.1, CH              | 3.59                    | 73.1, CH              | 3.59                    |                  | 26 | 36.2, CH <sub>2</sub> | 1.59; 1.68              | 37.4, CH <sub>2</sub> | 1.59; 1.68              | 36.2, CH <sub>2</sub> | 1.59; 1.68              | 54               | 72.2, CH               | 4.12       | 72.4, CH               | 4.11       | 182.8, C               |            |
| 3  | 34.2, CH <sub>2</sub> | 1.38; 1.54              | 34.3, CH <sub>2</sub> | 1.37; 1.54              | 34.3, CH <sub>2</sub> | 1.38; 1.54              |                  | 27 | 36.8, CH <sub>2</sub> | 2.12; 2.21              | 36.5, CH <sub>2</sub> | 2.12; 2.21              | 36.4, CH <sub>2</sub> | 1.54; 1.90              | 55               | 137.0, CH              | 5.69       | 133.8, CH              | 5.67       | 6.7, CH <sub>3</sub>   | 0.97       |
| 4  | 22.6, CH <sub>2</sub> | 1.38; 1.62              | 22.6, CH <sub>2</sub> | 1.38; 1.61              | 22.6, CH <sub>2</sub> | 1.38; 1.61              |                  | 28 | 139.0, C              |                         | 139.0, C              |                         | 139.1, C              |                         | 56               | 130.7, CH              | 6.23       | 130.7, CH              | 6.23       | 17.1, CH <sub>3</sub>  | 1.75       |
| 5  | 38.2, CH <sub>2</sub> | 1.40; 1.50              | 38.2, CH <sub>2</sub> | 1.40; 1.50              | 38.1, CH <sub>2</sub> | 1.40; 1.50              |                  | 29 | 125.9, CH             | 5.48                    | 125.9, CH             | 5.48                    | 125.8, CH             | 5.48                    | 57               | 130.7, CH              | 6.23       | 130.7, CH              | 6.23       | 112.6, CH <sub>2</sub> | 4.99; 5.09 |
| 6  | 72.0, CH              | 3.54                    | 72.1, CH              | 3.54                    | 72.0, CH              | 3.56                    |                  | 30 | 67.6, CH              | 4.55                    | 67.6, CH              | 4.55                    | 67.6, CH              | 4.56                    | 58               | 137.0, CH              | 5.69       | 133.8, CH              | 5.67       |                        |            |
| 7  | 38.2, CH <sub>2</sub> | 1.40; 1.50              | 38.2, CH <sub>2</sub> | 1.40; 1.50              | 38.1, CH <sub>2</sub> | 1.40; 1.50              |                  | 31 | 72.0, CH              | 3.69                    | 72.0, CH              | 3.69                    | 72.0, CH              | 3.68                    | 59               | 72.8, CH               | 4.10       | 72.4, CH               | 4.11       |                        |            |
| 8  | 22.6, CH <sub>2</sub> | 1.38; 1.62              | 22.6, CH <sub>2</sub> | 1.38; 1.61              | 22.6, CH <sub>2</sub> | 1.38; 1.62              |                  | 32 | 78.8, CH              | 3.96                    | 78.9, CH              | 3.97                    | 78.8, CH              | 3.96                    | 60               | 34.2, CH <sub>2</sub>  | 1.59; 1.71 | 33.7, CH <sub>2</sub>  | 1.71; 1.73 |                        |            |
| 9  | 37.6, CH <sub>2</sub> | 1.40; 1.52              | 37.6, CH <sub>2</sub> | 1.39; 1.52              | 37.7, CH <sub>2</sub> | 1.40; 1.52              |                  | 33 | 67.1, CH              | 3.97                    | 68.4, CH              | 4.04                    | 68.4, CH              | 4.05                    | 61               | 34.2, CH <sub>2</sub>  | 1.38; 1.54 | 34.2, CH <sub>2</sub>  | 1.71; 1.87 |                        |            |
| 10 | 71.9, CH              | 3.58                    | 72.2, CH              | 3.58                    | 72.4, CH              | 3.59                    |                  | 34 | 68.4, CH              | 4.04                    | 68.4, CH              | 3.97                    | 67.1, CH              | 3.98                    | 62               | 73.0, CH               | 3.58       | 77.3, CH               | 4.50       |                        |            |
| 11 | 41.2, CH <sub>2</sub> | 2.20 (2H)               | 41.4, CH <sub>2</sub> | 2.20 (2H)               | 41.2, CH <sub>2</sub> | 2.19 (2H)               |                  | 35 | 30.0, CH <sub>2</sub> | 1.79 (2H)               | 30.1, CH <sub>2</sub> | 1.79 (2H)               | 30.1, CH <sub>2</sub> | 1.79 (2H)               | 63               | 67.8, CH <sub>2</sub>  | 3.43; 3.48 | 69.1, CH <sub>2</sub>  | 4.10; 4.26 |                        |            |
| 12 | 128.6, CH             | 5.69                    | 128.6, CH             | 5.68                    | 128.5, CH             | 5.70                    |                  | 36 | 75.3, CH              | 3.49                    | 75.3, CH              | 3.49                    | 75.3, CH              | 3.49                    | 64               | 6.6, CH <sub>3</sub>   | 0.98       | 6.7, CH <sub>3</sub>   | 0.98       |                        |            |
| 13 | 136.0, CH             | 5.53                    | 135.9, CH             | 5.53                    | 135.9, CH             | 5.55                    |                  | 37 | 74.2, CH              | 3.60                    | 74.1, CH              | 3.60                    | 74.1, CH              | 3.61                    | 65               | 17.1, CH <sub>3</sub>  | 1.75       | 17.1, CH <sub>3</sub>  | 1.75       |                        |            |
| 14 | 73.2, CH              | 4.05                    | 73.3, CH              | 4.05                    | 73.2, CH              | 4.05                    |                  | 38 | 32.1, CH <sub>2</sub> | 1.57; 1.97              | 32.3, CH <sub>2</sub> | 1.57; 1.97              | 32.2, CH <sub>2</sub> | 1.56; 1.97              | 66               | 112.8, CH <sub>2</sub> | 4.99; 5.08 | 112.7, CH <sub>2</sub> | 4.99; 5.08 |                        |            |
| 15 | 41.7, CH <sub>2</sub> | 2.25 (2H)               | 41.8, CH <sub>2</sub> | 2.24 (2H)               | 41.7, CH <sub>2</sub> | 2.24 (2H)               |                  | 39 | 27.8, CH <sub>2</sub> | 2.10; 2.42              | 27.9, CH <sub>2</sub> | 2.10; 2.42              | 28.0, CH <sub>2</sub> | 2.10; 2.41              |                  |                        |            |                        |            |                        |            |
| 16 | 129.7, CH             | 5.54                    | 129.6, CH             | 5.53                    | 129.6, CH             | 5.55                    |                  | 40 | 151.4, C              |                         | 151.1, C              |                         | 151.2, C              |                         |                  |                        |            |                        |            |                        |            |
| 17 | 137.3, CH             | 5.60                    | 130.1, CH             | 5.60                    | 130.1, CH             | 5.60                    |                  | 41 | 76.3, CH              | 4.18                    | 76.2, CH              | 4.18                    | 76.1, CH              | 4.19                    |                  |                        |            |                        |            |                        |            |
| 18 | 37.7, CH <sub>2</sub> | 2.08; 2.48              | 37.7, CH <sub>2</sub> | 2.08; 2.48              | 37.7, CH <sub>2</sub> | 2.08; 2.48              |                  | 42 | 74.1, CH              | 3.35                    | 75.0, CH              | 3.34                    | 75.0, CH              | 3.35                    |                  |                        |            |                        |            |                        |            |
| 19 | 72.2, CH              | 3.52                    | 72.2, CH              | 3.52                    | 72.1, CH              | 3.52                    |                  | 43 | 70.0, CH              | 4.05                    | 70.1, CH              | 4.04                    | 70.2, CH              | 4.04                    |                  |                        |            |                        |            |                        |            |
| 20 | 78.9, CH              | 3.52                    | 78.7, CH              | 3.52                    | 78.7, CH              | 3.52                    |                  | 44 | 31.1, CH <sub>2</sub> | 1.56; 2.09              | 31.3, CH <sub>2</sub> | 1.56; 2.09              | 31.2, CH <sub>2</sub> | 1.56; 2.09              |                  |                        |            |                        |            |                        |            |
| 21 | 35.0, CH              | 2.30                    | 35.0, CH              | 2.30                    | 34.9, CH              | 2.30                    |                  | 45 | 66.8, CH              | 4.05                    | 67.1, CH              | 4.05                    | 67.2, CH              | 4.05                    |                  |                        |            |                        |            |                        |            |
| 22 | 79.9, CH              | 3.53                    | 79.6, CH              | 3.53                    | 79.7, CH              | 3.53                    |                  | 46 | 68.4, CH              | 4.05                    | 68.4, CH              | 4.04                    | 68.4, CH              | 4.05                    |                  |                        |            |                        |            |                        |            |
| 23 | 71.7, CH              | 3.71                    | 71.2, CH              | 3.71                    | 71.7, CH              | 3.72                    |                  | 47 | 80.2, CH              | 3.74                    | 80.3, CH              | 3.75                    | 80.1, CH              | 3.75                    |                  |                        |            |                        |            |                        |            |
| 24 | 40.7, CH <sub>2</sub> | 1.54; 1.91              | 40.9, CH <sub>2</sub> | 1.53; 1.91              | 40.8, CH <sub>2</sub> | 1.54; 1.90              |                  | 48 | 71.6, CH              | 3.97                    | 71.7, CH              | 3.96                    | 71.6, CH              | 3.97                    |                  |                        |            |                        |            |                        |            |
|    |                       |                         |                       |                         |                       |                         |                  | 49 | 73.8, CH              | 4.37                    | 73.9, CH              | 4.36                    | 73.7, CH              | 4.37                    |                  |                        |            |                        |            |                        |            |
|    |                       |                         |                       |                         |                       |                         |                  | 50 | 128.6, CH             | 5.64                    | 128.6, CH             | 5.63                    | 128.5, CH             | 5.66                    |                  |                        |            |                        |            |                        |            |
|    |                       |                         |                       |                         |                       |                         |                  | 51 | 134.9, CH             | 5.80                    | 135.0, CH             | 5.80                    | 134.7, CH             | 5.83                    |                  |                        |            |                        |            |                        |            |
|    |                       |                         |                       |                         |                       |                         |                  | 52 | 29.3, CH <sub>2</sub> | 2.16 (2H)               | 29.4, CH <sub>2</sub> | 2.15 (2H)               | 29.4, CH <sub>2</sub> | 2.18 (2H)               |                  |                        |            |                        |            |                        |            |

[illegible]

Figure S2. COSY spectrum (600 MHz, CD<sub>3</sub>OD) for amphidinol 24.

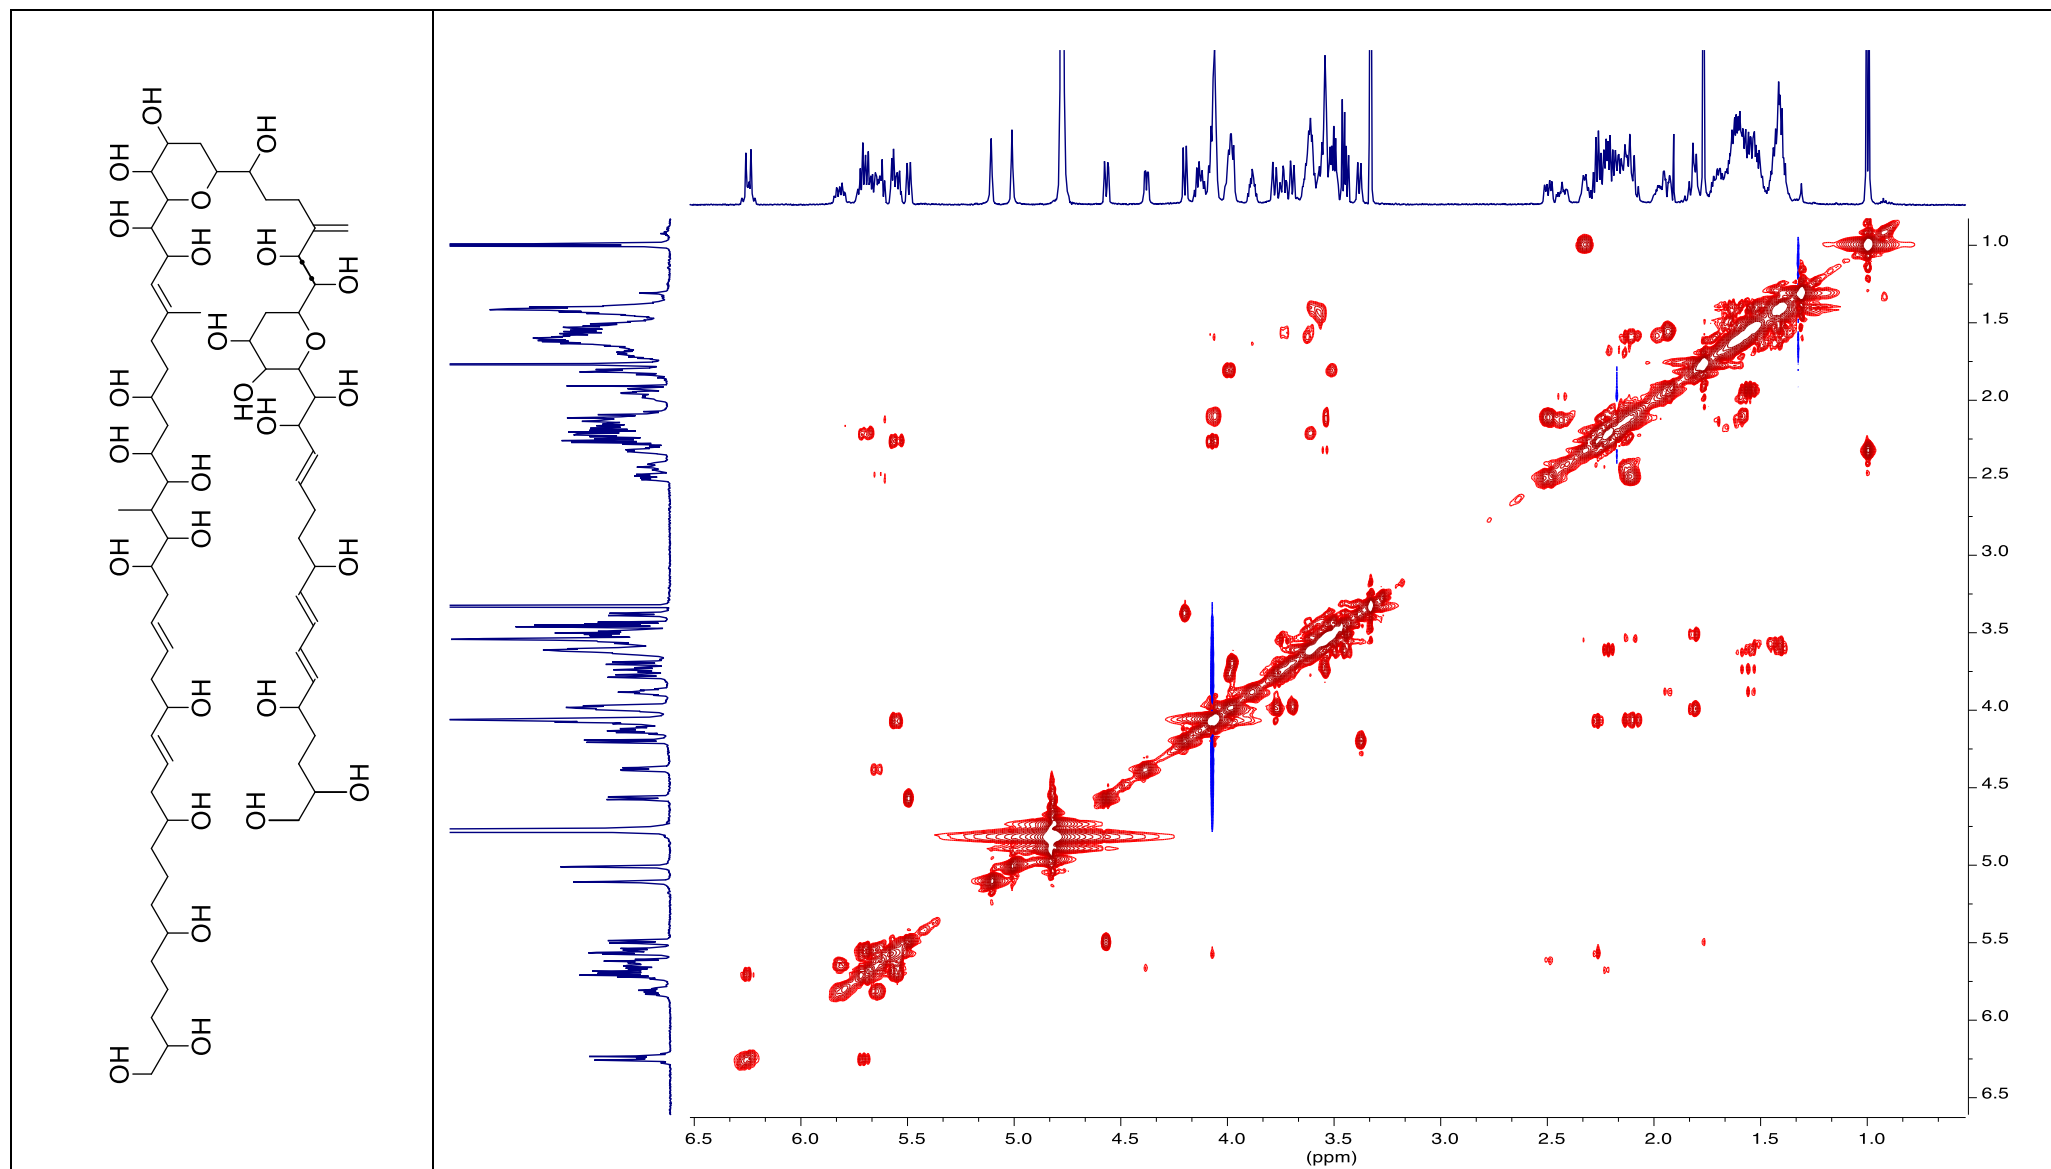

Figure S3. HSQC<sub>ed</sub> spectrum (600 MHz, CD<sub>3</sub>OD) for amphidinol 24.

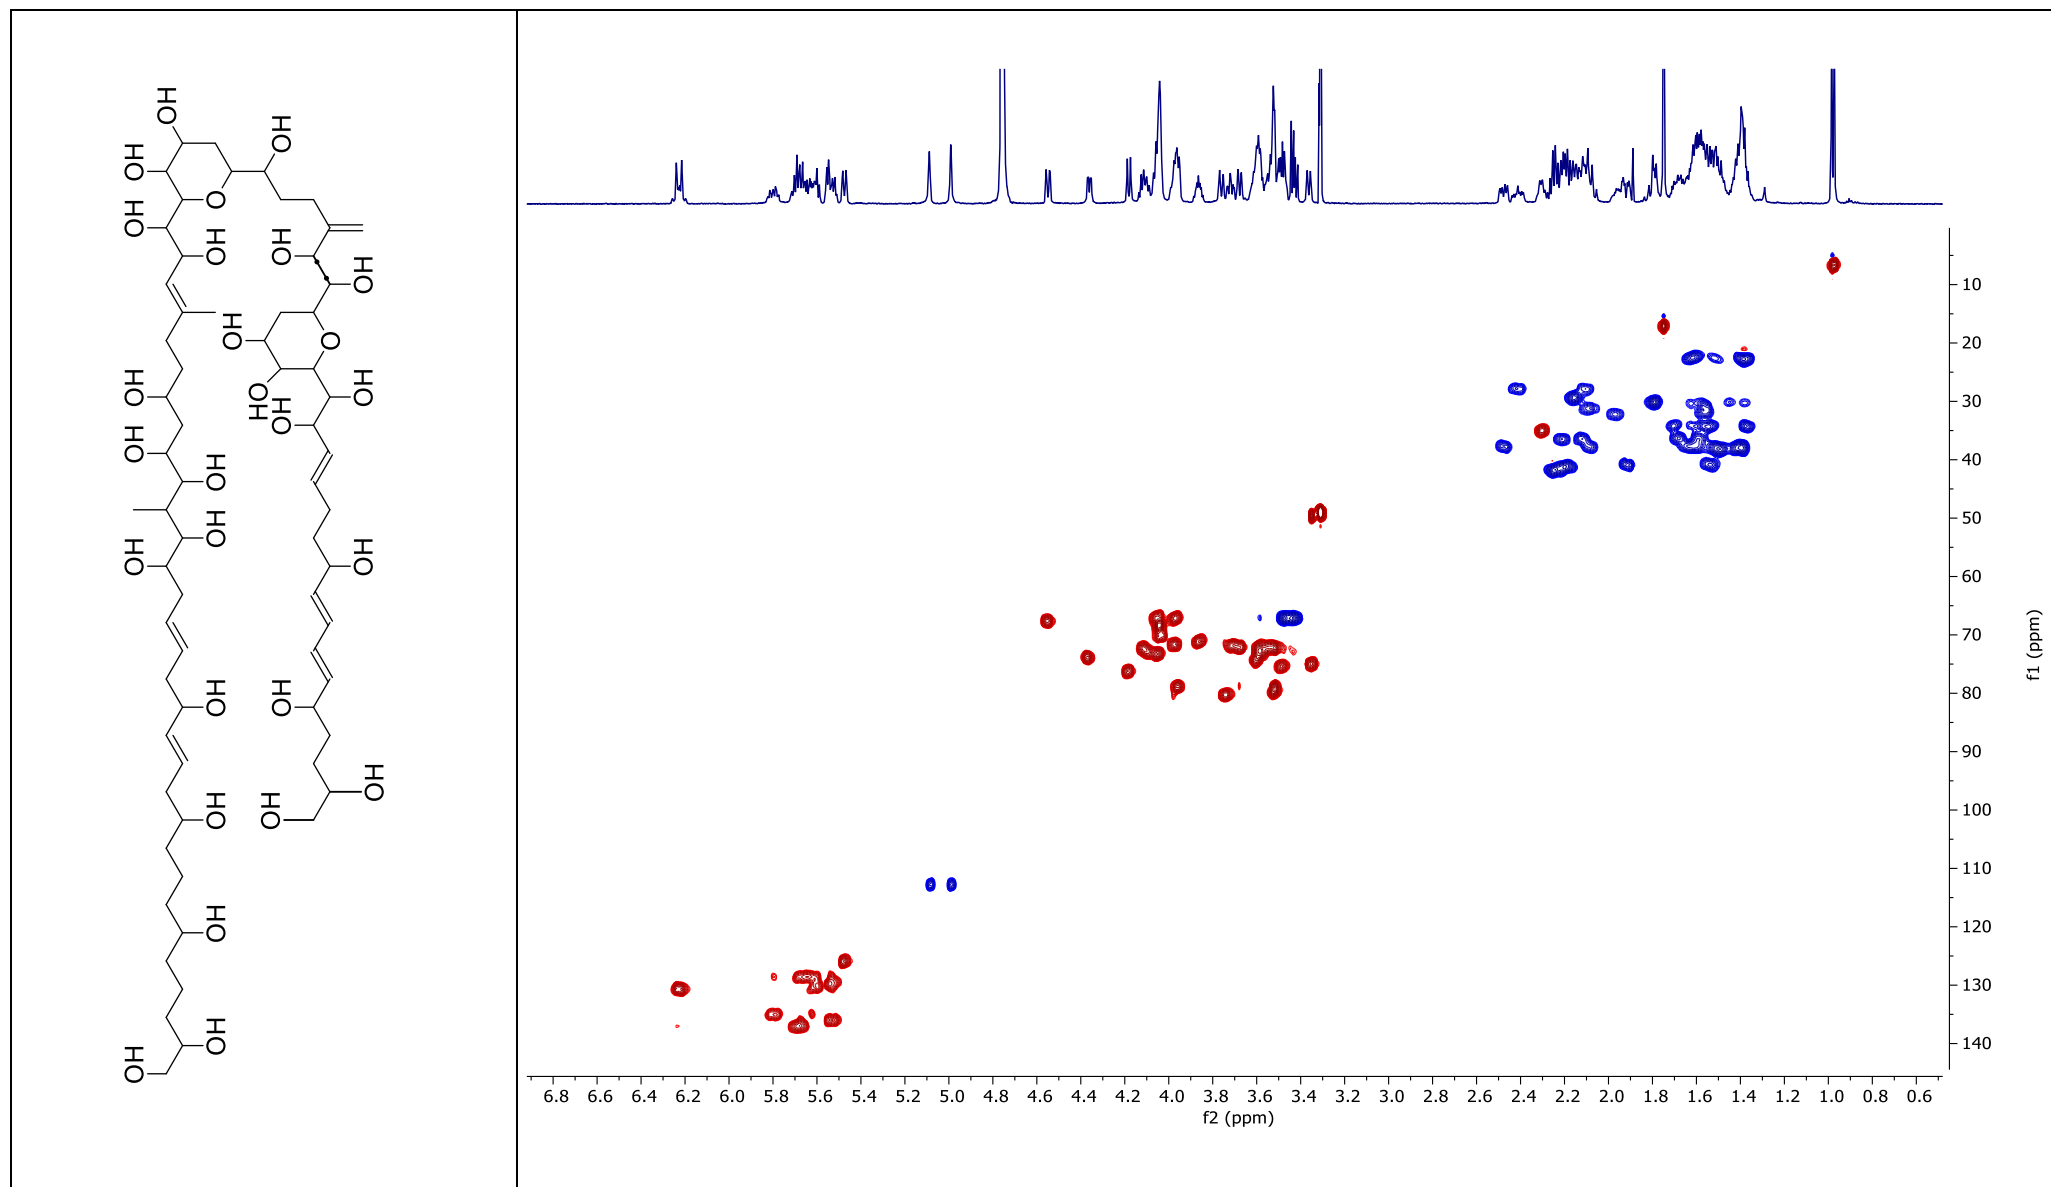

Figure S4. HSQC-TOCSY spectrum (600 MHz, CD<sub>3</sub>OD) for amphidinol 24.

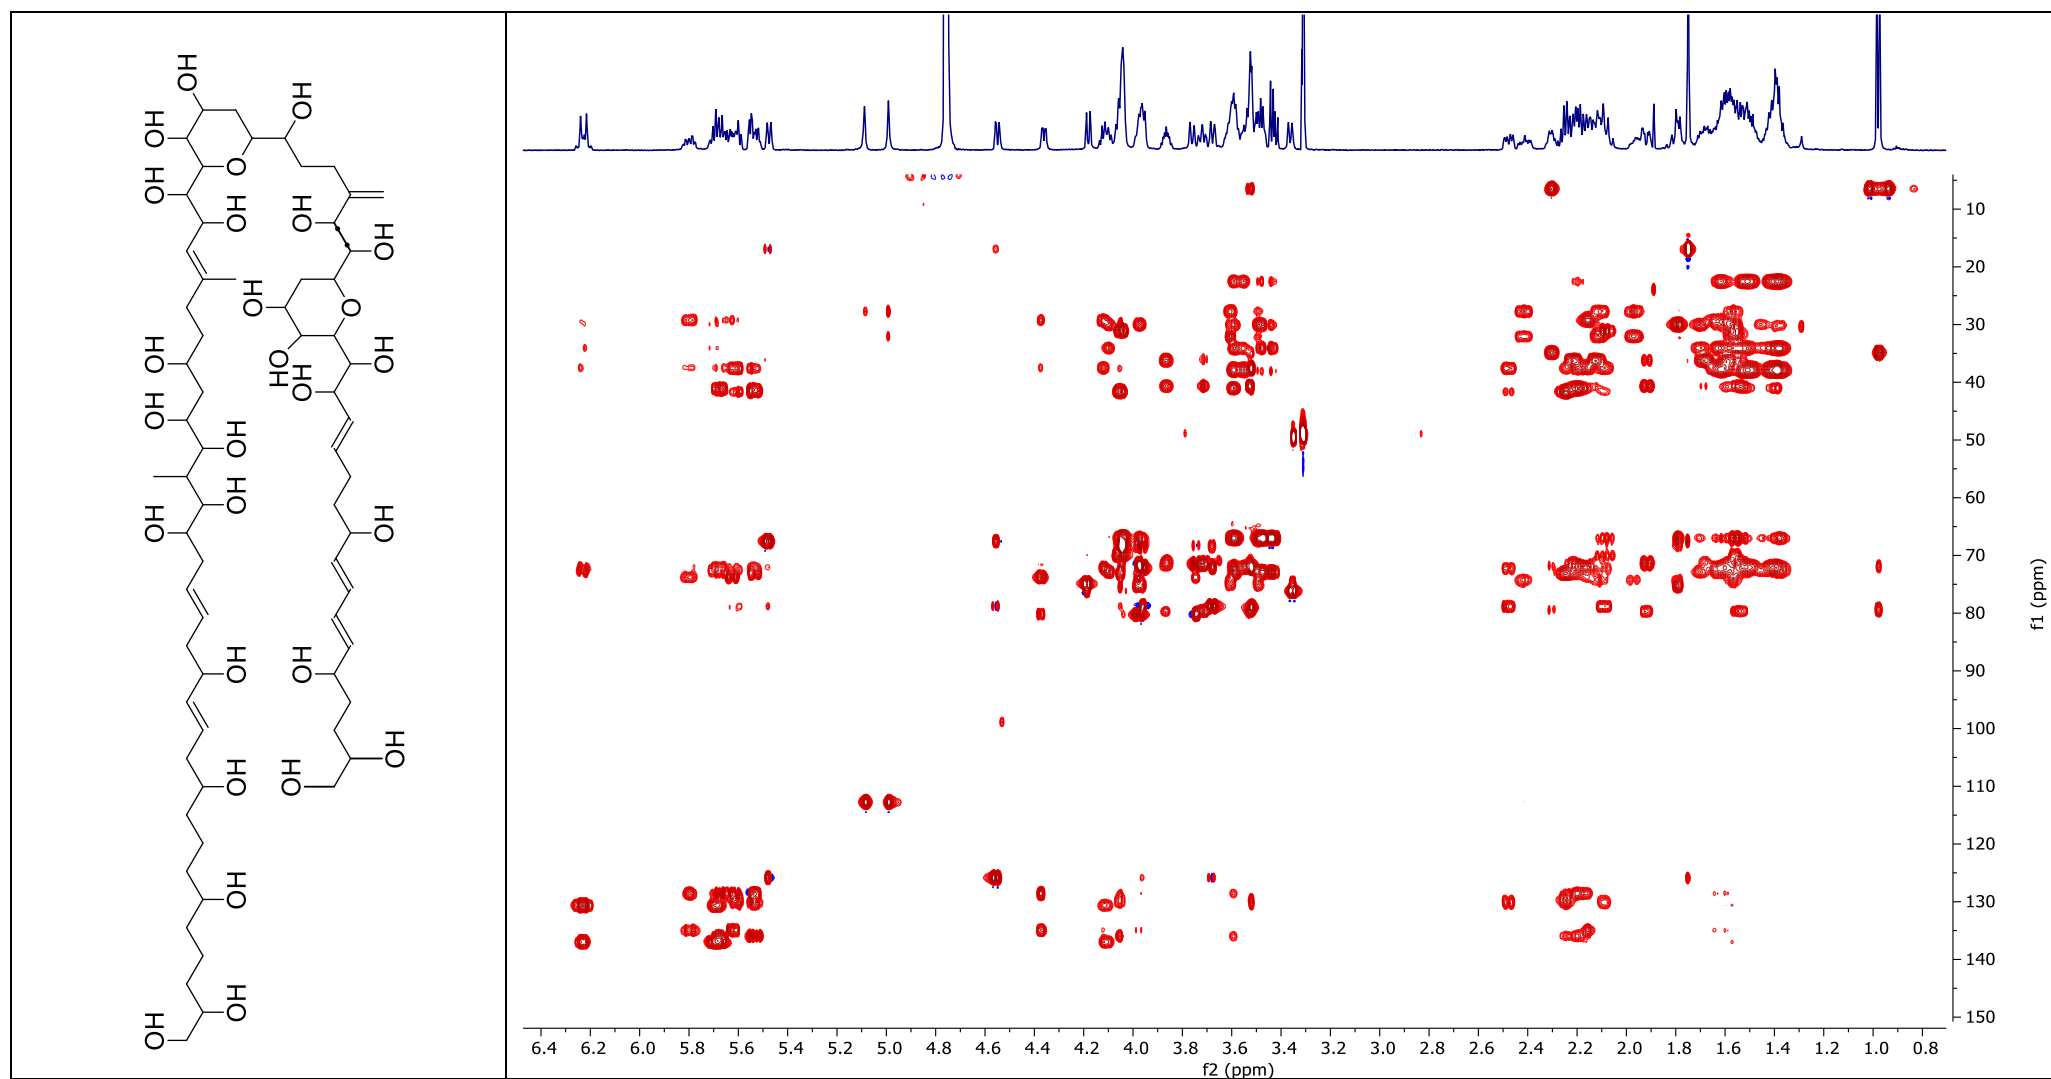

The figure displays the chemical structure of a complex polyhydroxy compound and its corresponding NMR spectra. The chemical structure is a long, branched molecule with multiple hydroxyl groups and a central ether linkage. The NMR spectra include a 1D <sup>1</sup>H NMR spectrum at the top and a 2D COSY spectrum below it. The 1D spectrum shows peaks in the aromatic region (6.5-7.5 ppm), a sugar region (4.5-6.0 ppm), and a long aliphatic chain region (1.0-2.5 ppm). The COSY spectrum shows correlations between protons in the aliphatic chain and the sugar moiety.

Figure S6. H2BC spectrum(600 MHz, CD<sub>3</sub>OD) for amphidinol 24.

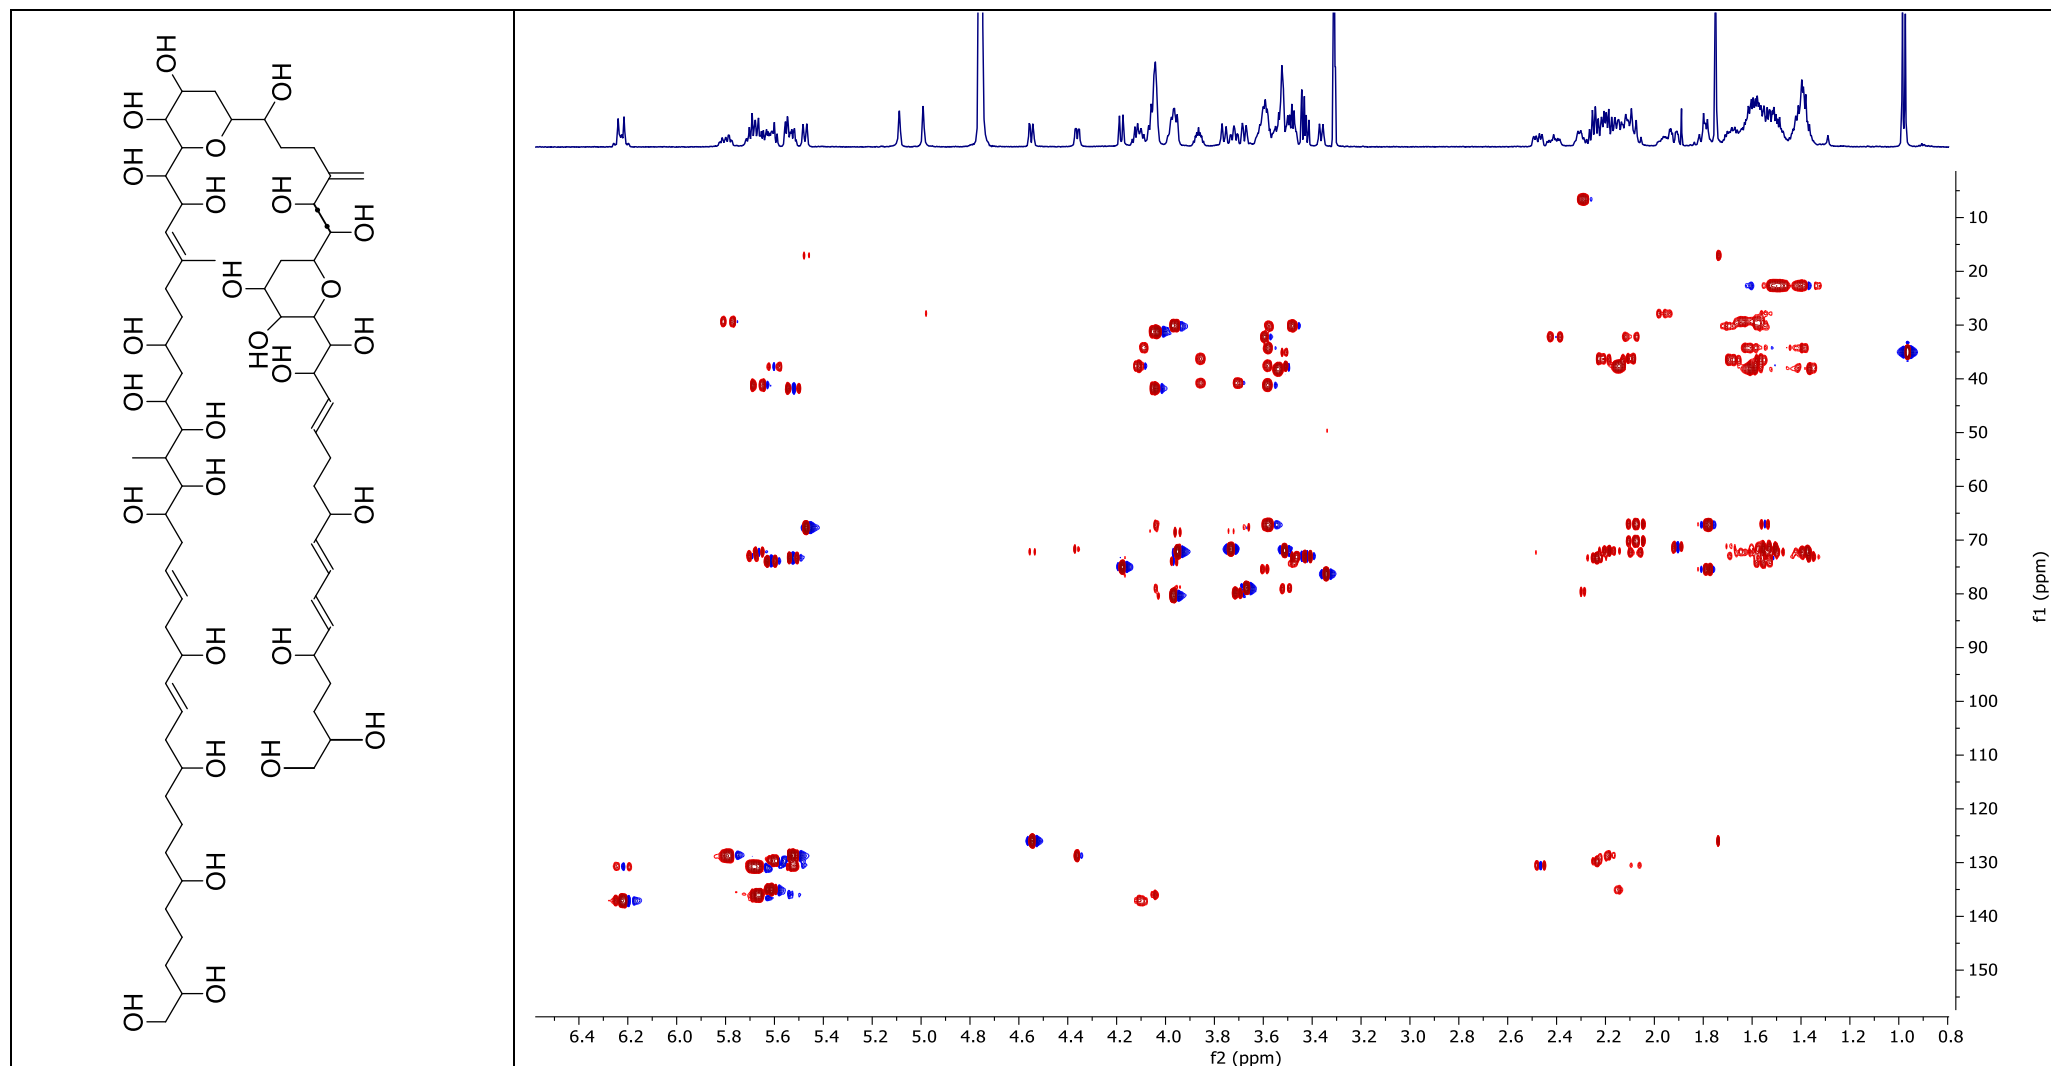



Figure S7. T-ROESY spectrum (600 MHz, CD<sub>3</sub>OD) for amphidinol 24.

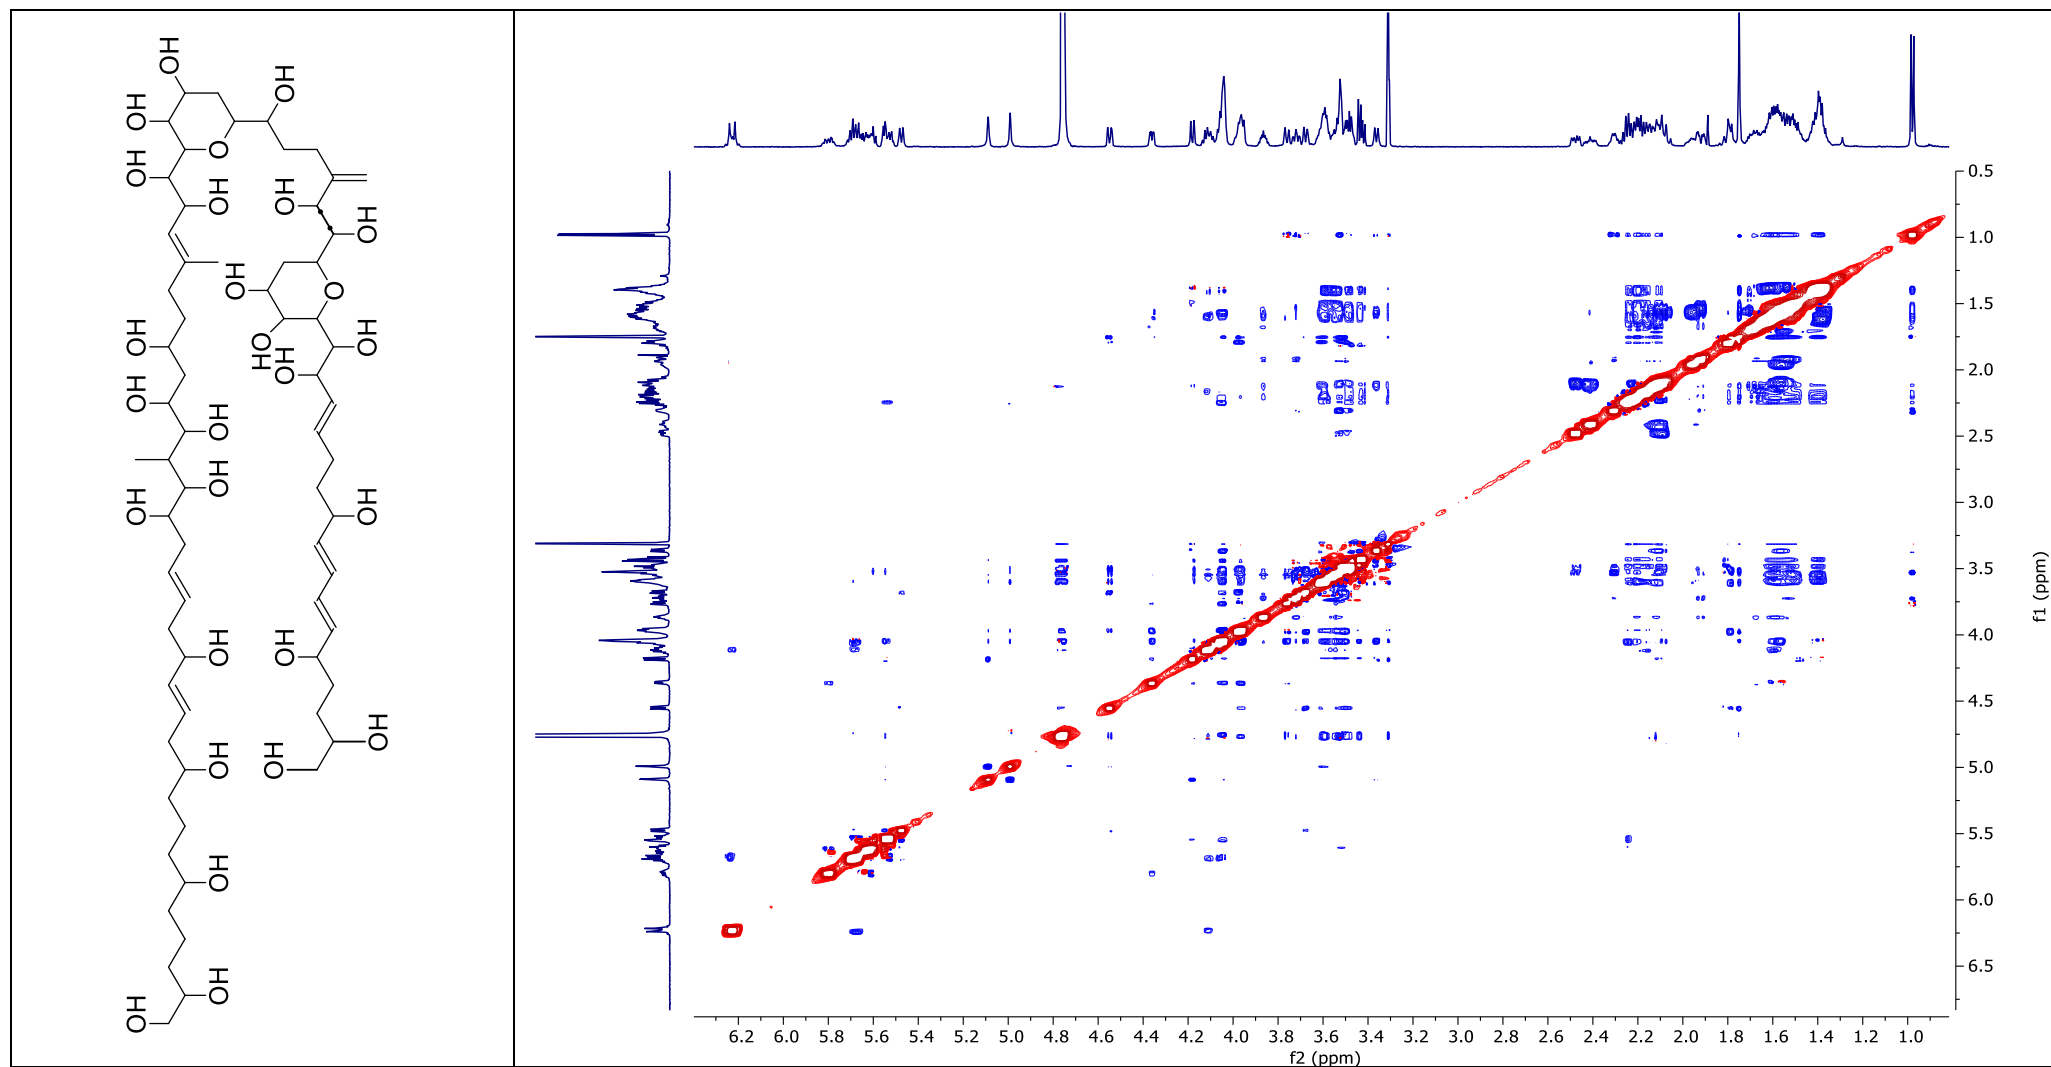

Figure S8. 1D-NOESY spectra (600 MHz, CD<sub>3</sub>OD) for amphidinol 24.

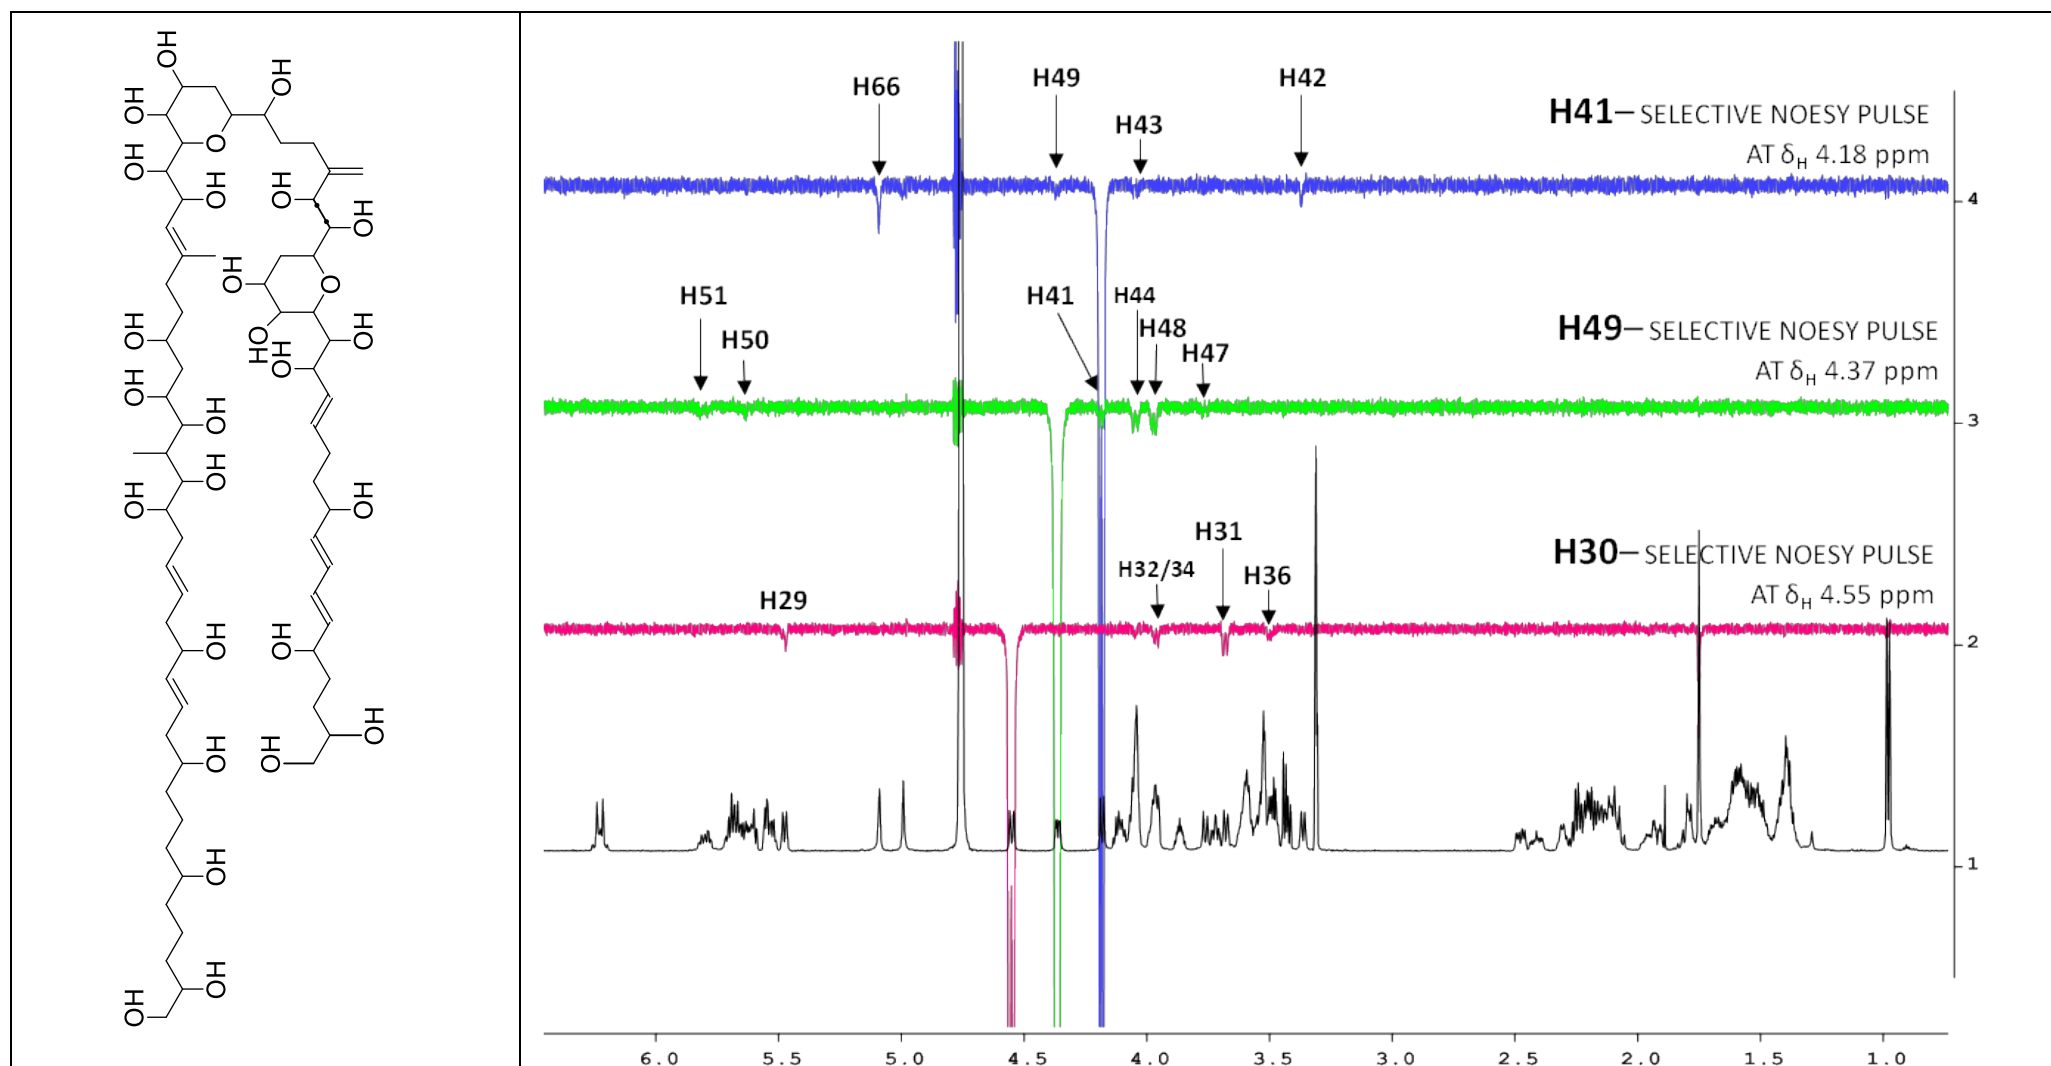

Figure S9.  $^1\text{H}$  NMR spectrum (600 MHz,  $\text{CD}_3\text{OD}-\text{C}_5\text{D}_5\text{N}$  2:1) for amphidinol 24.

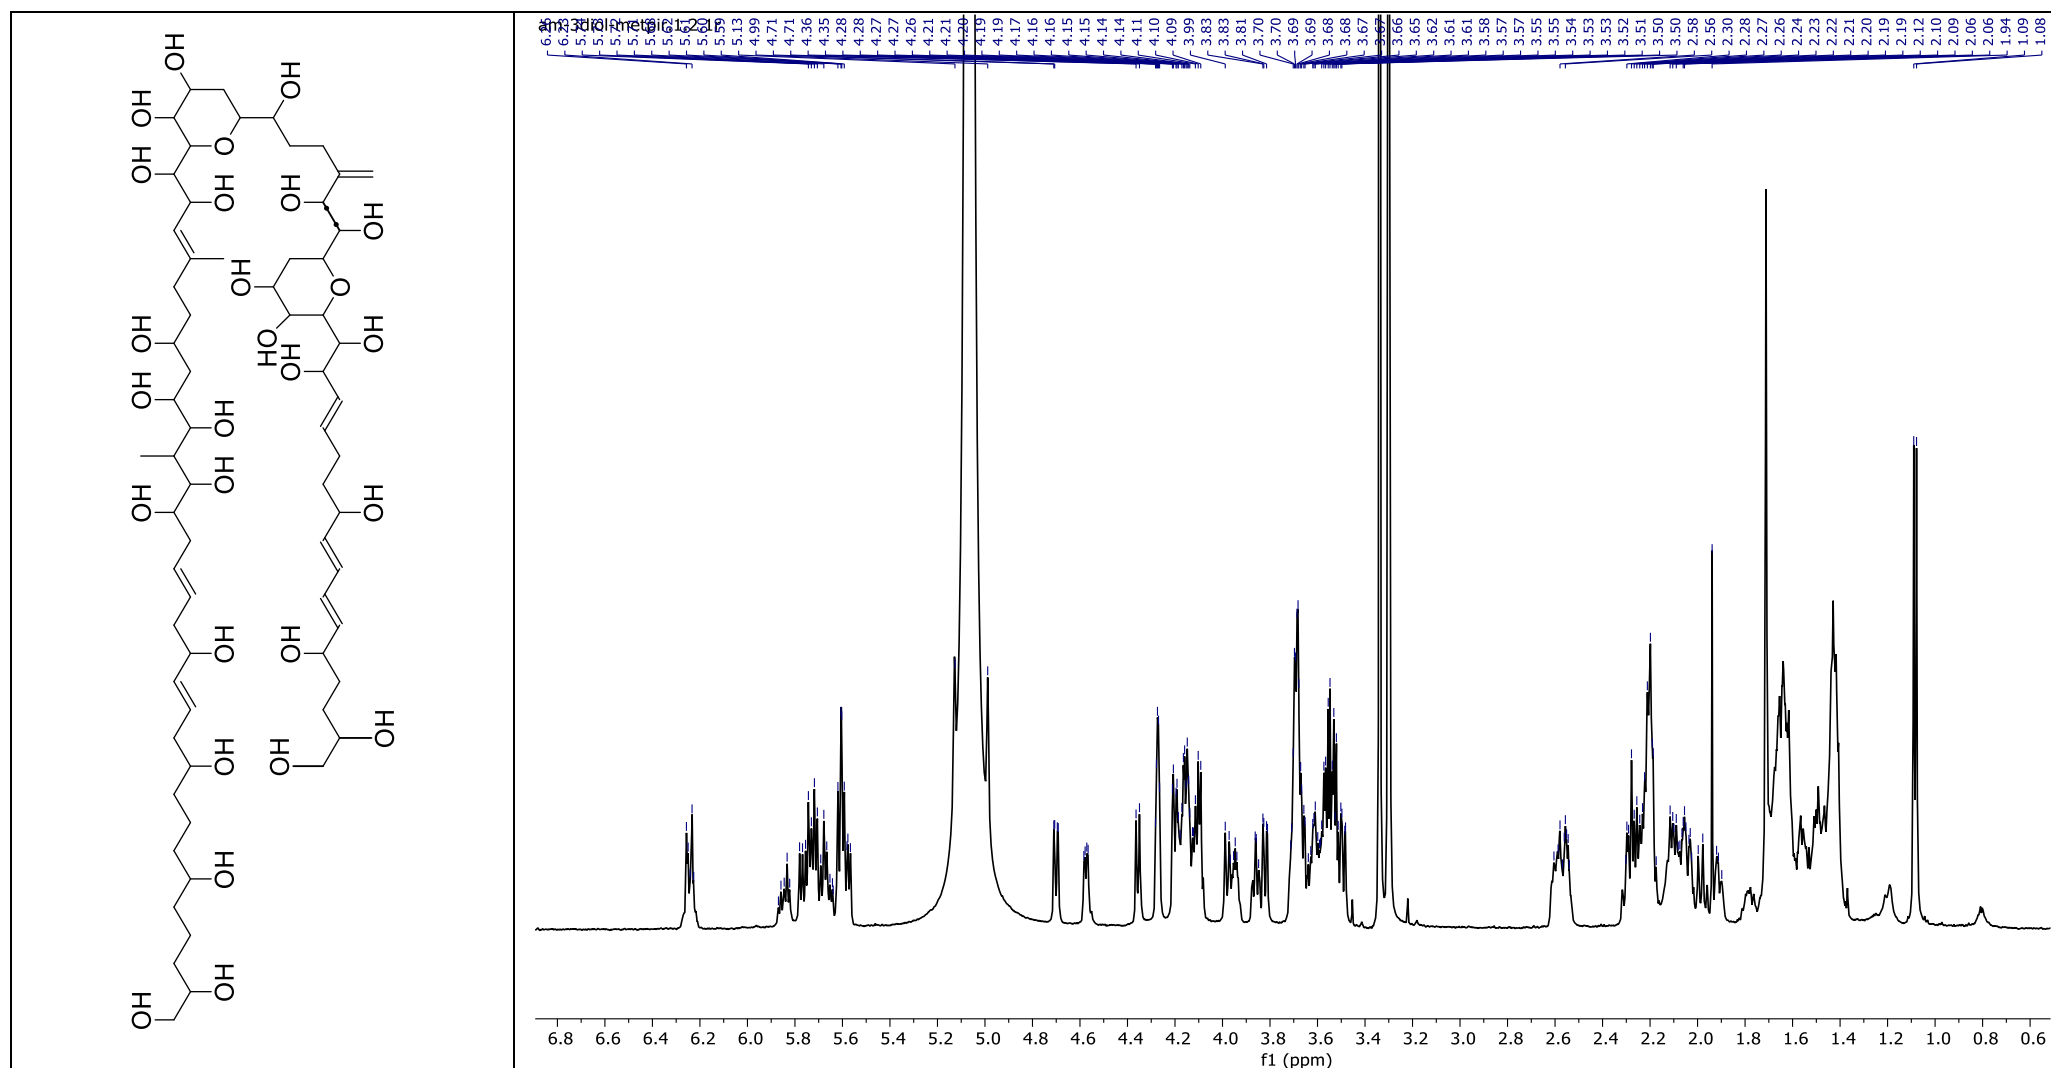

Figure S10. HSQC<sub>ed</sub> spectrum (600 MHz, CD<sub>3</sub>OD-C<sub>5</sub>D<sub>5</sub>N 2:1) for amphidinol 24.

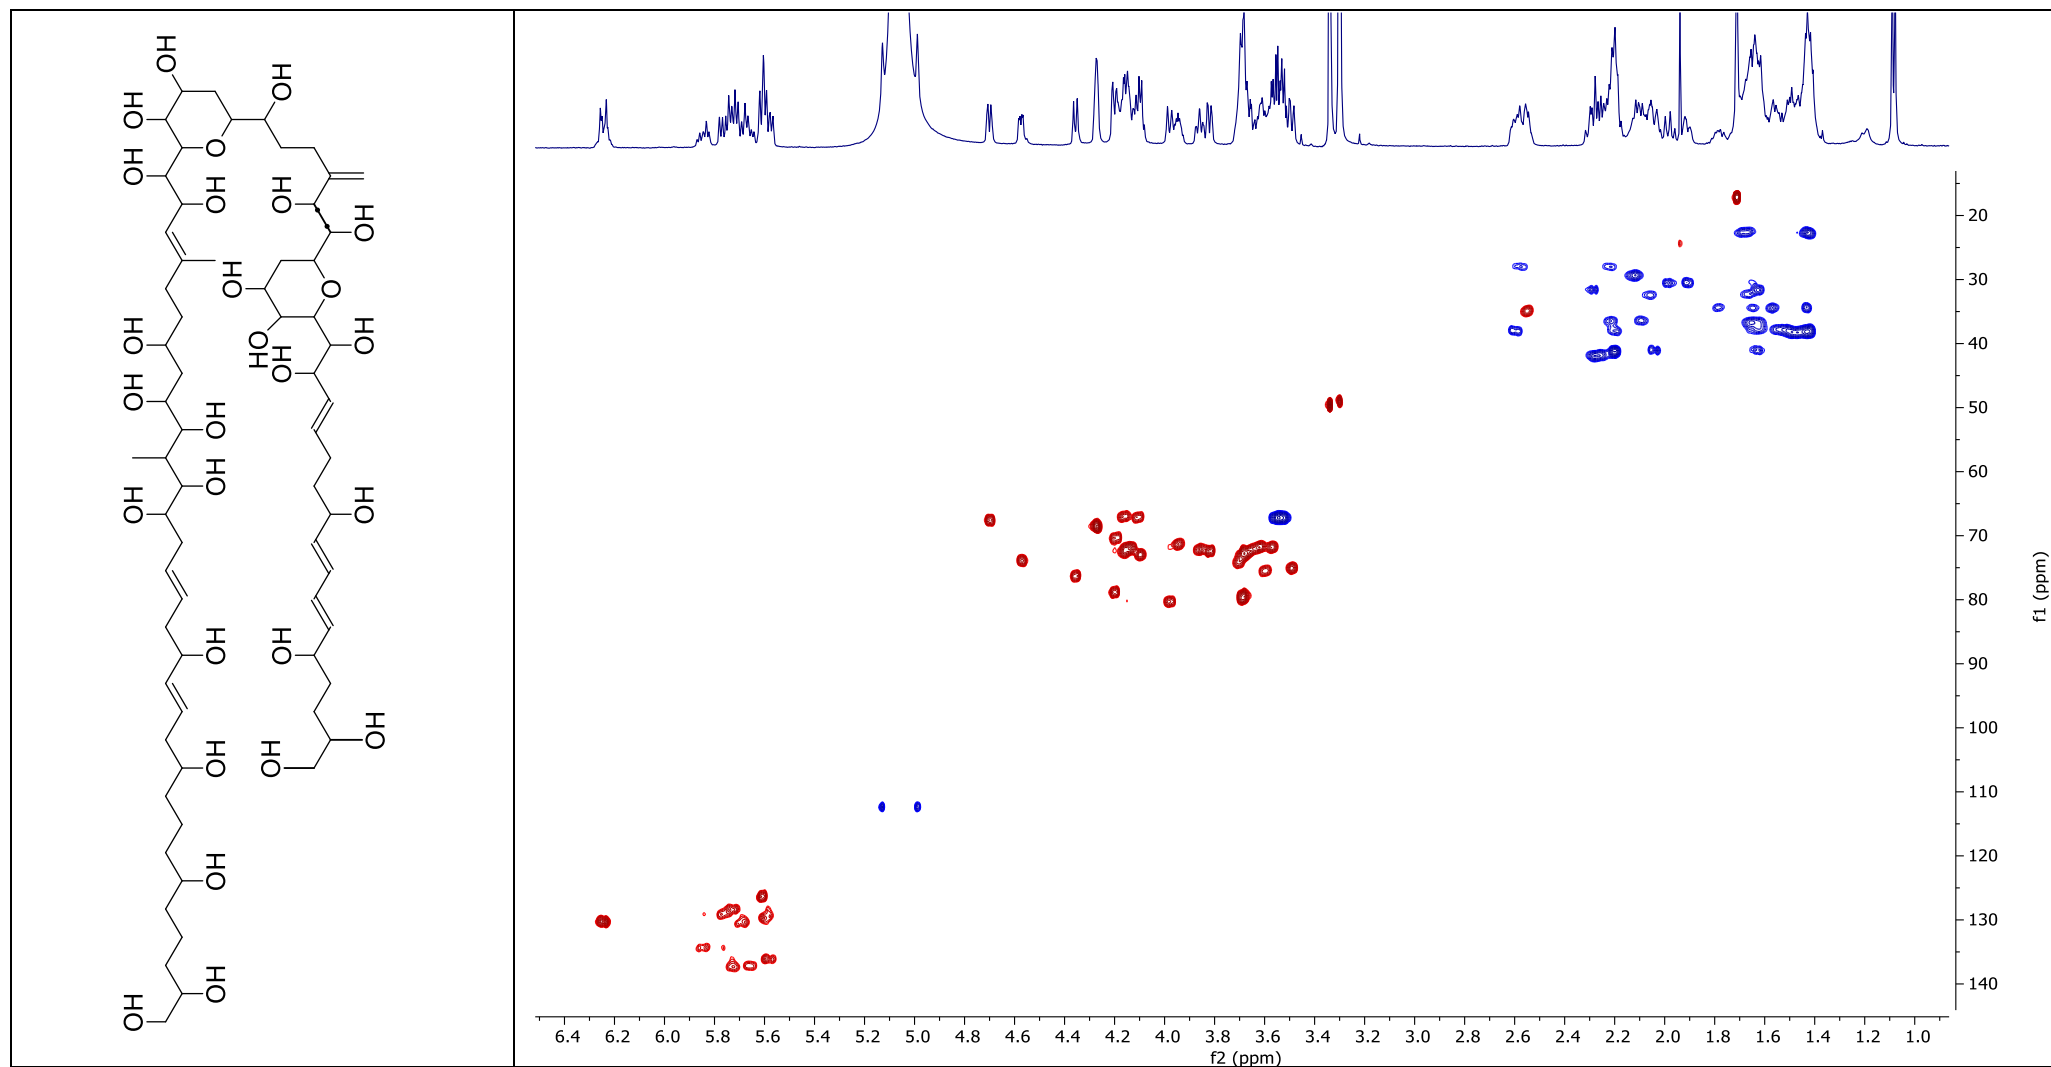

Figure S11. HSQC-TOCSY spectrum (600 MHz, CD<sub>3</sub>OD-C<sub>5</sub>D<sub>5</sub>N 2:1) for amphidinol 24.

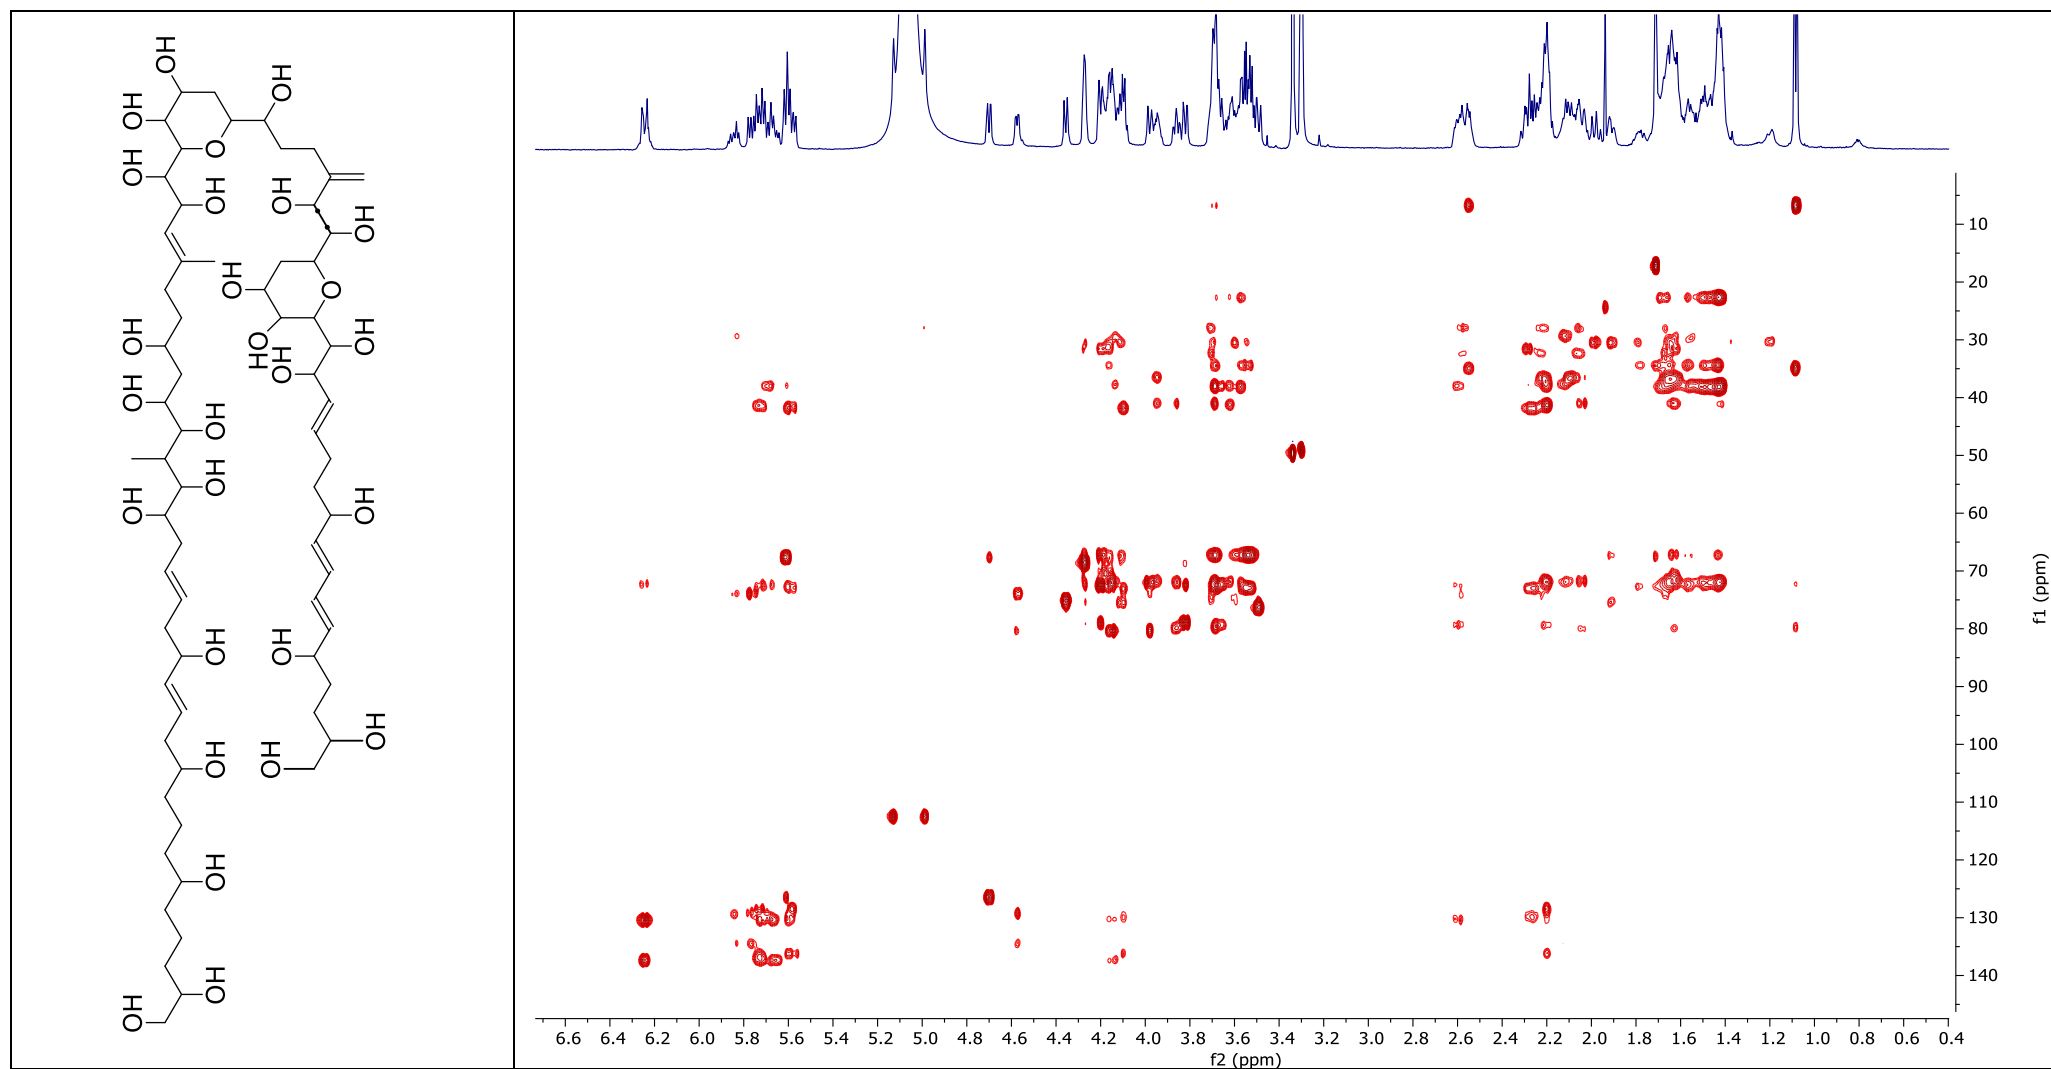

Figure S12. HMBC spectrum (600 MHz, CD<sub>3</sub>OD-C<sub>5</sub>D<sub>5</sub>N 2:1) for amphidinol 24.

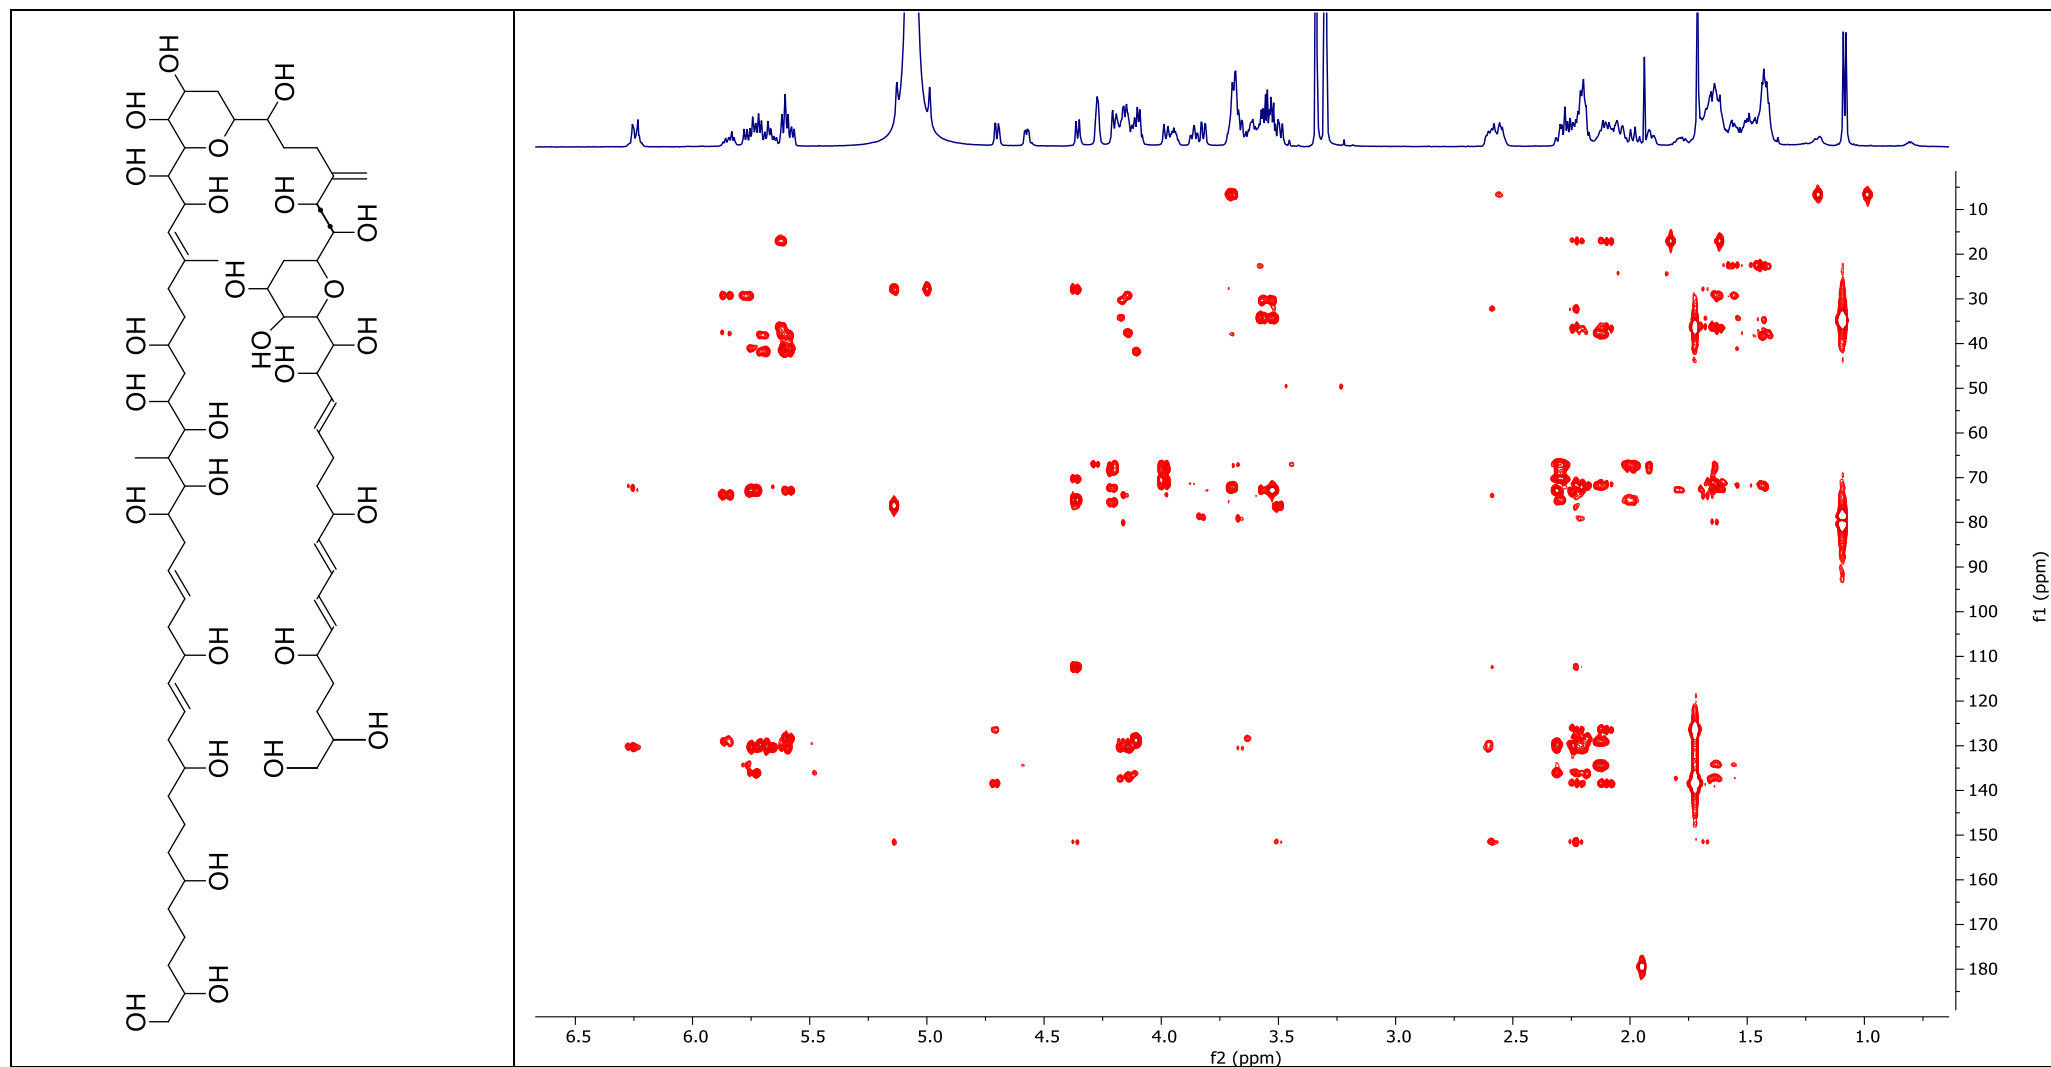

Figure S13. H2BC spectrum (600 MHz, CD<sub>3</sub>OD-C<sub>5</sub>D<sub>5</sub>N 2:1) for amphidinol 24.

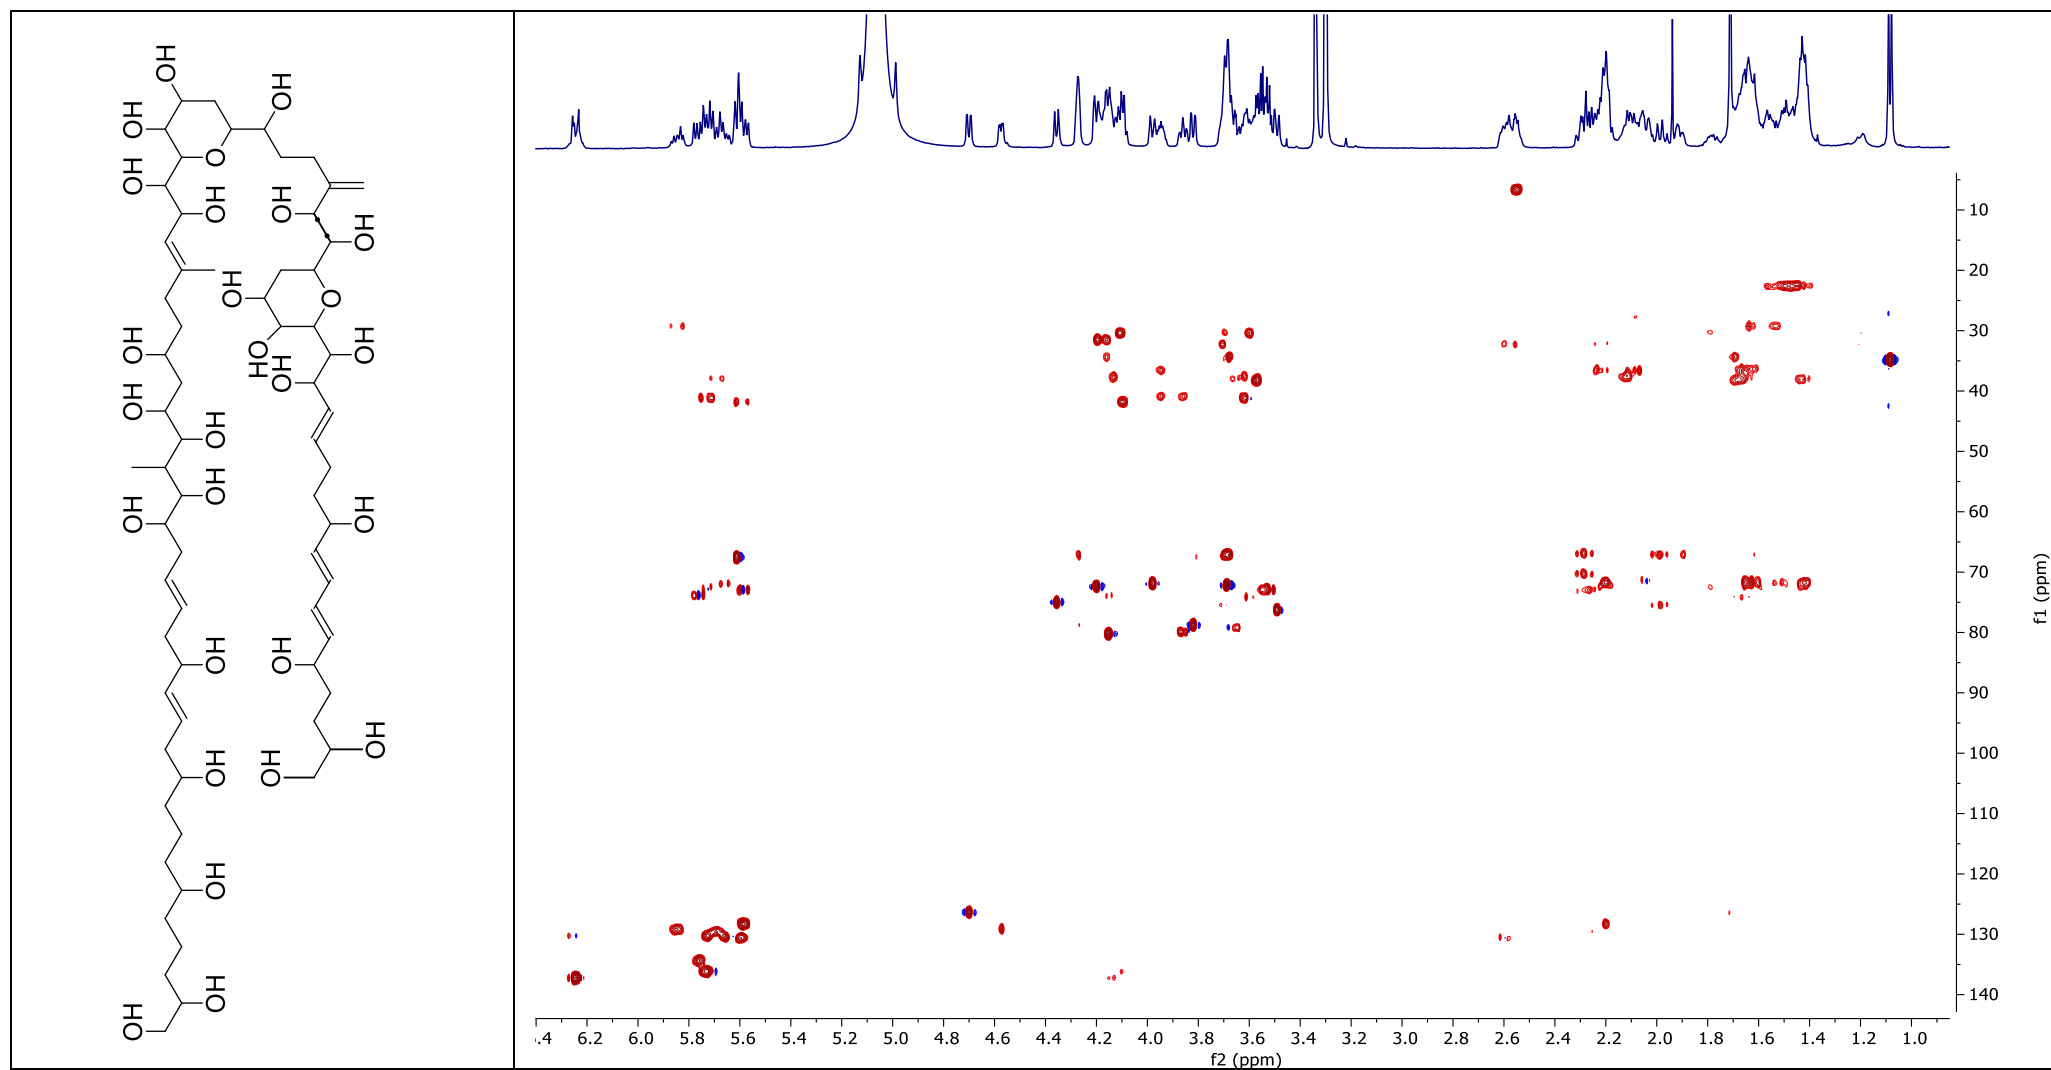

Figure S14. T-ROESY spectrum (600 MHz, CD<sub>3</sub>OD-C<sub>5</sub>D<sub>5</sub>N 2:1) for amphidinol 24.

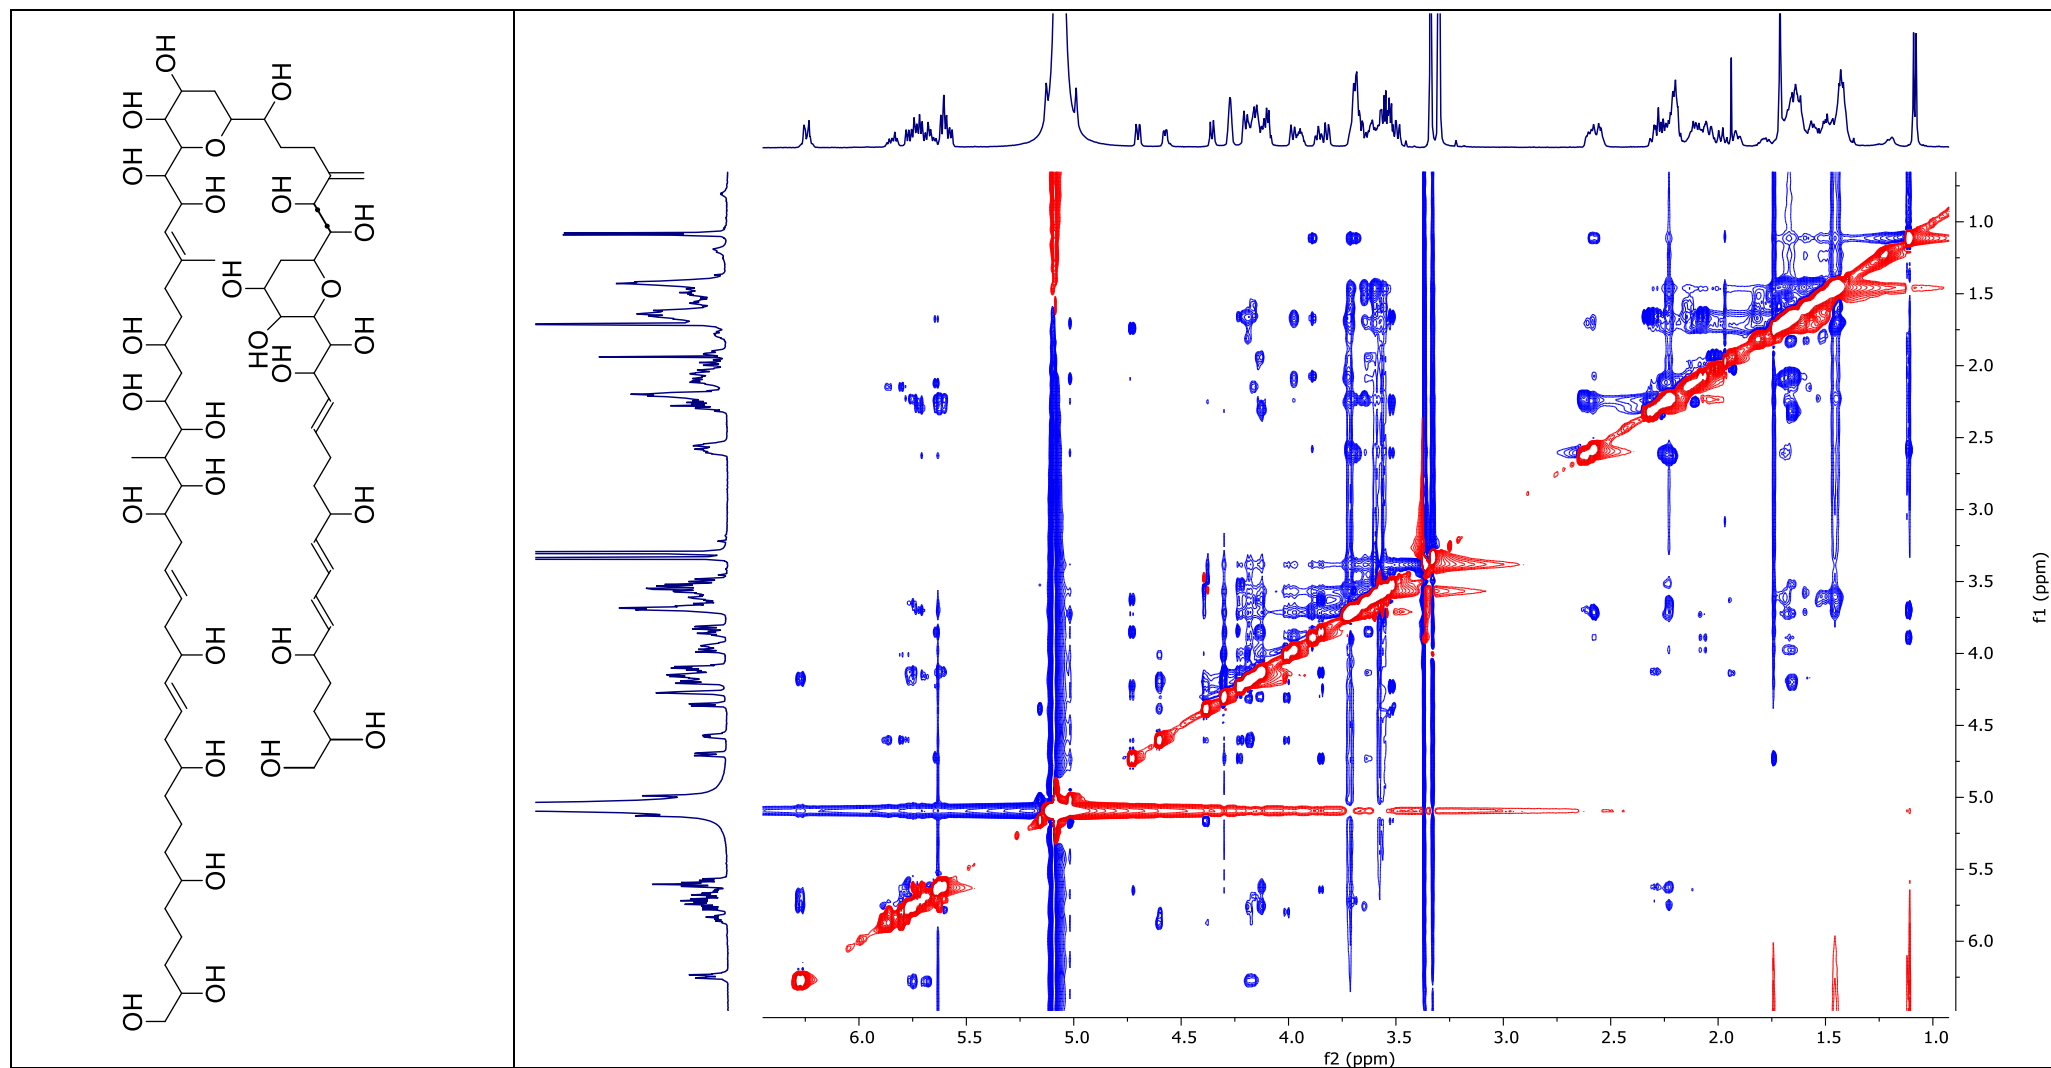



Figure S15. 1D-NOESY spectrum (600 MHz, CD<sub>3</sub>OD-C<sub>5</sub>D<sub>5</sub>N 2:1) for amphidinol 24.

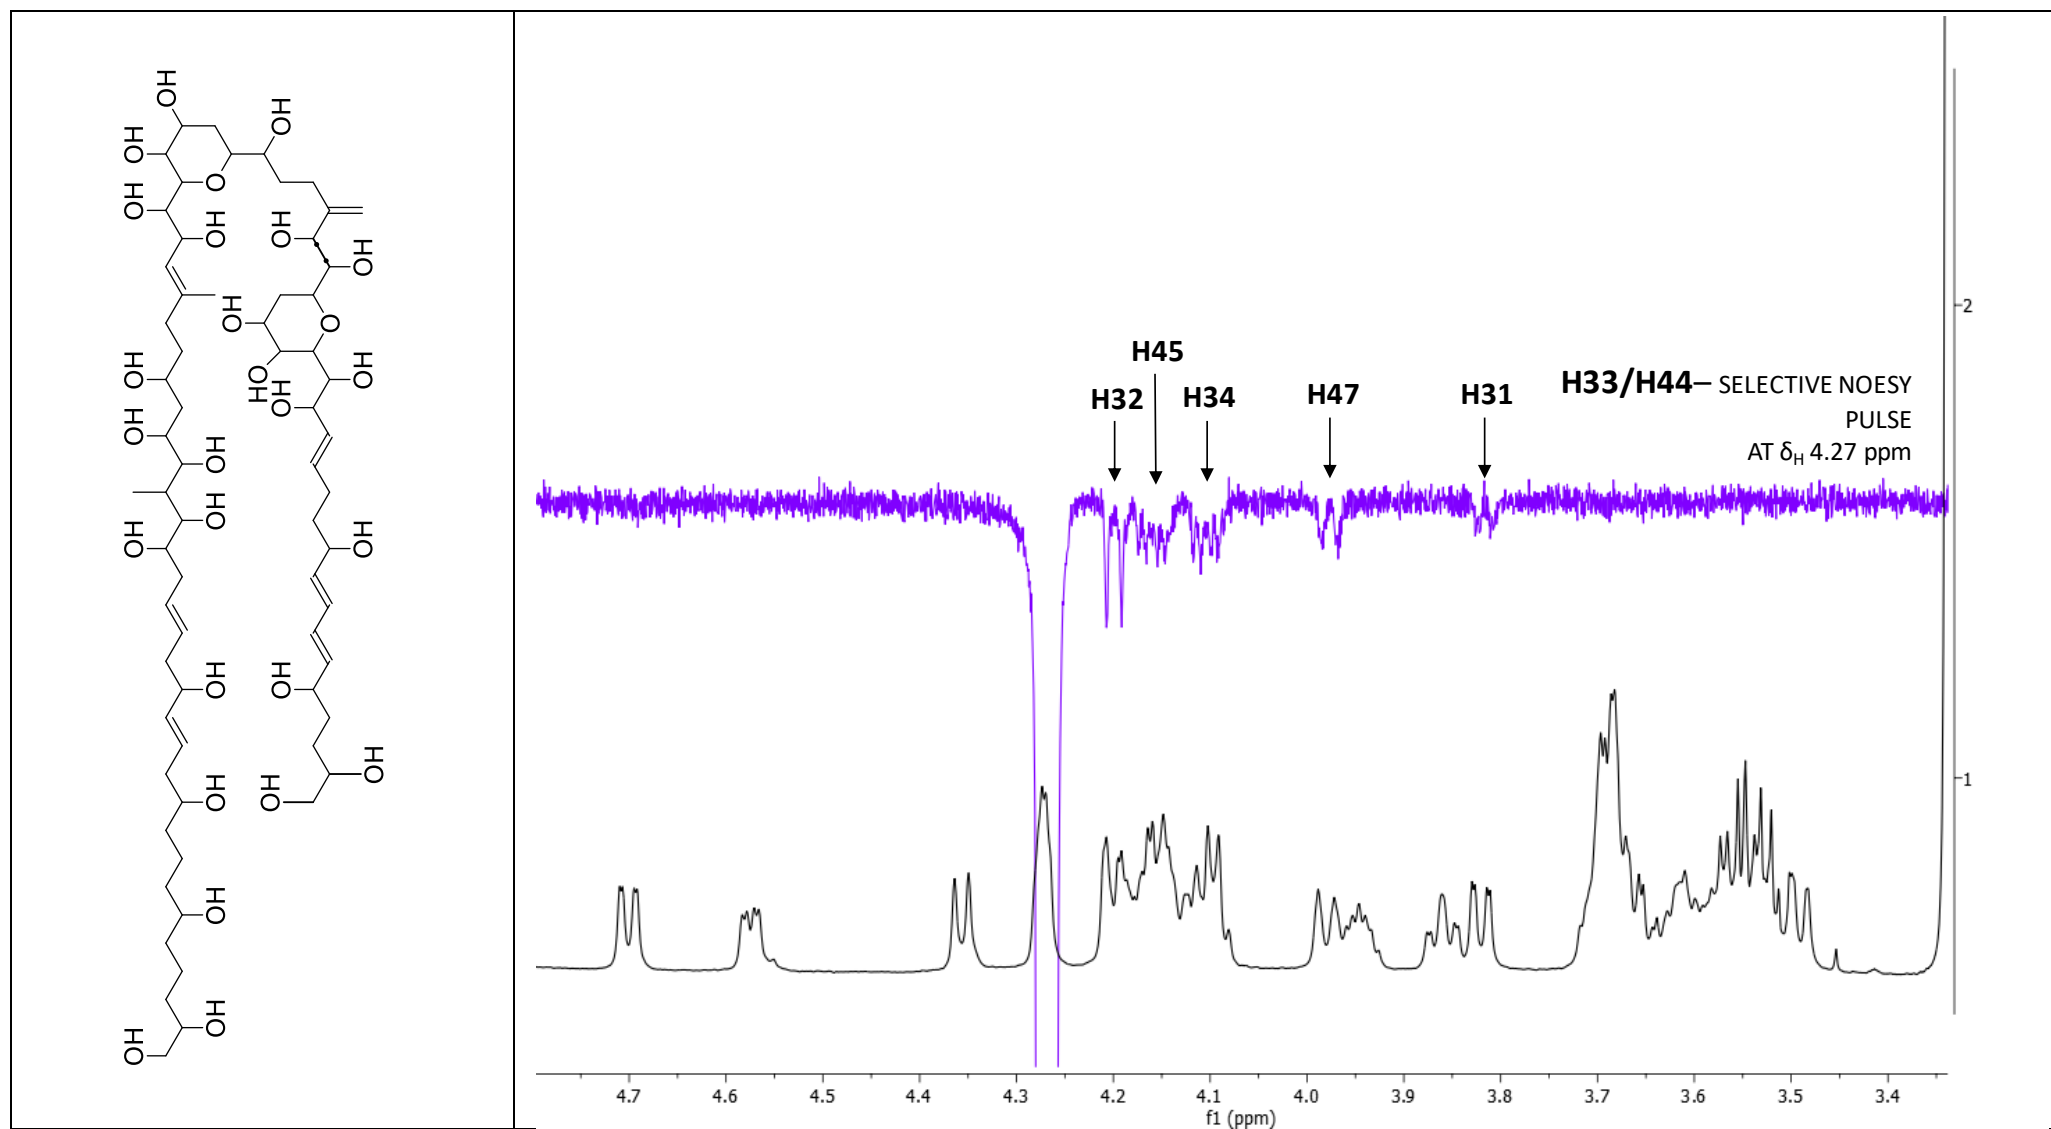

**Table S2.**  $^1\text{H}$  and  $^{13}\text{C}$  NMR data comparison for carbons C-30  $\rightarrow$  C-51 in  $\text{CD}_3\text{OD}-\text{C}_5\text{D}_5\text{N}$  2:1 for amphidinol 24 *versus* related synthetic fragments 4a and 4b reported by Wakamiya et al [22].

| #  | $\delta\text{C}$ , type                                 |       |            | #  | $\delta\text{H}$                                        |      |            |
|----|---------------------------------------------------------|-------|------------|----|---------------------------------------------------------|------|------------|
|    | $\text{CD}_3\text{OD}-\text{C}_5\text{D}_5\text{N}$ 2:1 | 4a    | am 24 / 4a |    | $\text{CD}_3\text{OD}-\text{C}_5\text{D}_5\text{N}$ 2:1 | 4a   | am 24 / 4b |
| 30 | 67.6, CH                                                | 71.1  | -3,5       | 30 | 4.7                                                     | 4.08 | 0,62       |
| 31 | 72.4, CH                                                | 68.3  | 4,1        | 31 | 3.82                                                    | 4.14 | -0,32      |
| 32 | 78.9, CH                                                | 78.3  | 0,6        | 32 | 4.2                                                     | 4.26 | -0,06      |
| 33 | 68.6, CH                                                | 69.1  | -0,5       | 33 | 4.27                                                    | 4.33 | -0,06      |
| 34 | 67.2, CH                                                | 67.3  | -0,1       | 34 | 4.11                                                    | 4.11 | 0          |
| 35 | 30.5, $\text{CH}_2$                                     | 31.7  | -1,2       | 35 | 1.91                                                    | 1.69 | 0,22       |
| 36 | 75.5, CH                                                | 74.8  | 0,7        | 36 | 1.99                                                    | 2.08 | -0,09      |
| 37 | 74.1, CH                                                | 74.2  | -0,1       | 37 | 3.6                                                     | 3.62 | -0,02      |
| 38 | 32.4, $\text{CH}_2$                                     | 32.2  | 0,2        | 38 | 3.7                                                     | 3.65 | 0,05       |
|    |                                                         |       |            |    | 1.67                                                    | 1.73 | -0,06      |
| 39 | 28.0, $\text{CH}_2$                                     | 27.8  | 0,2        | 39 | 2.06                                                    | 1.91 | 0,15       |
|    |                                                         |       |            |    | 2.22                                                    | 2.24 | -0,02      |
| 40 | 151.5, C                                                | 152.0 | -0,5       | 40 | 2.58                                                    | 2.54 | 0,04       |
| 41 | 76.3, CH                                                | 76.5  | -0,2       | 41 | 4.36                                                    | 4.39 | -0,03      |
| 42 | 75.1, CH                                                | 75.4  | -0,3       | 42 | 3.5                                                     | 3.51 | -0,01      |
| 43 | 70.4, CH                                                | 70.6  | -0,2       | 43 | 4.19                                                    | 4.19 | 0          |
|    |                                                         |       |            |    | 1.63                                                    | 1.64 | -0,01      |
| 44 | 31.6, $\text{CH}_2$                                     | 31.9  | -0,3       | 44 | 2.29                                                    | 2.34 | -0,05      |
|    |                                                         |       |            |    | 4.16                                                    | 4.18 | -0,02      |
| 45 | 67.0, CH                                                | 67.3  | -0,3       | 45 | 4.28                                                    | 4.34 | -0,06      |
| 46 | 68.5, CH                                                | 68.7  | -0,2       | 46 | 3.97                                                    | 4.02 | -0,05      |
| 47 | 80.3, CH                                                | 80.6  | -0,3       | 47 | 4.15                                                    | 4.20 | -0,05      |
| 48 | 72.0, CH                                                | 72.2  | -0,2       | 48 | 4.57                                                    | 4.63 | -0,06      |
| 49 | 73.9, CH                                                | 74.1  | -0,2       | 49 | 5.76                                                    | 5.78 | -0,02      |
| 50 | 129.2, CH                                               | 129.8 | -0,6       | 50 | 5.81                                                    | 5.81 | 0,04       |
| 51 | 134.4, CH                                               | 134.1 | 0,3        | 51 |                                                         |      |            |

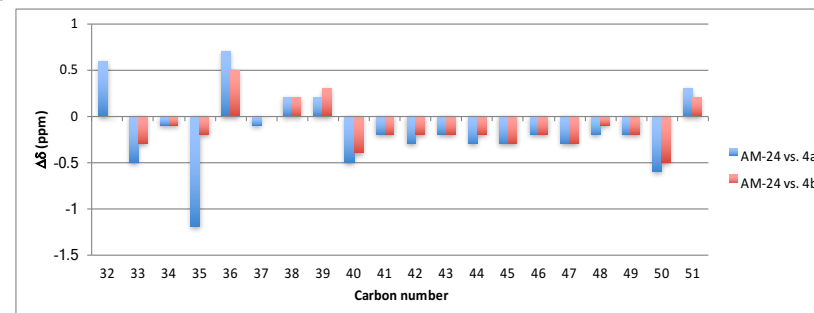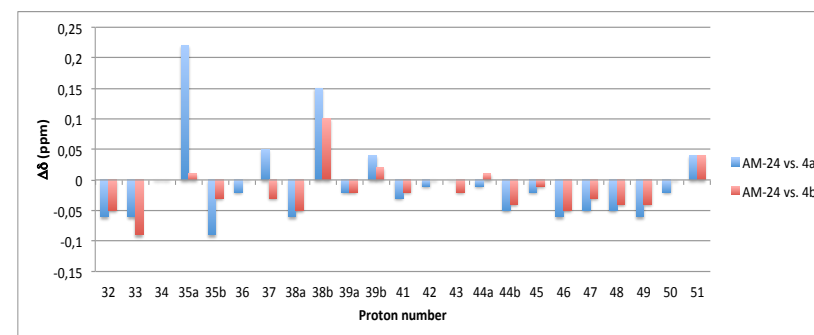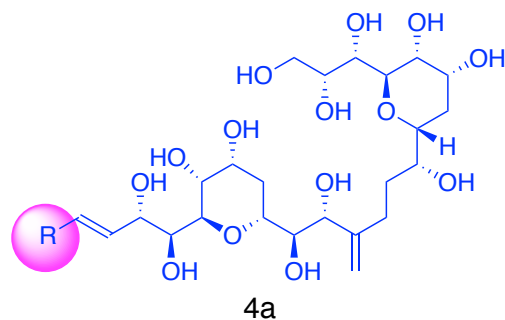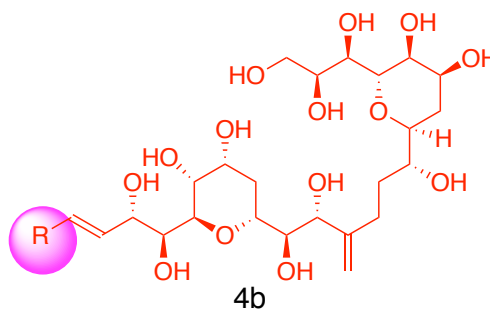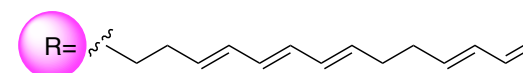

Figure S16. HRESIMS spectrum for amphidinol 24.

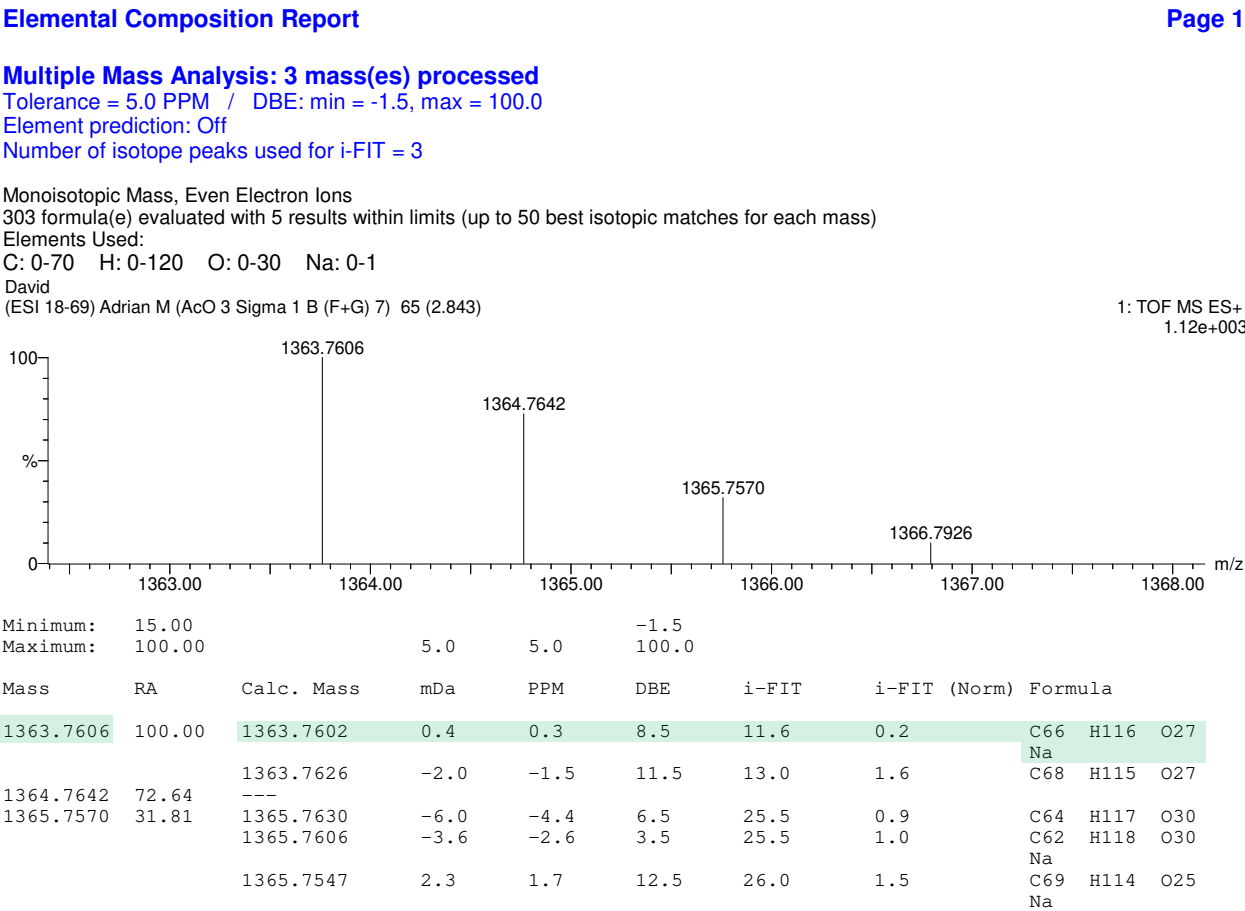

Figure S17. Main MS/MS fragments observed for amphidinol 24.

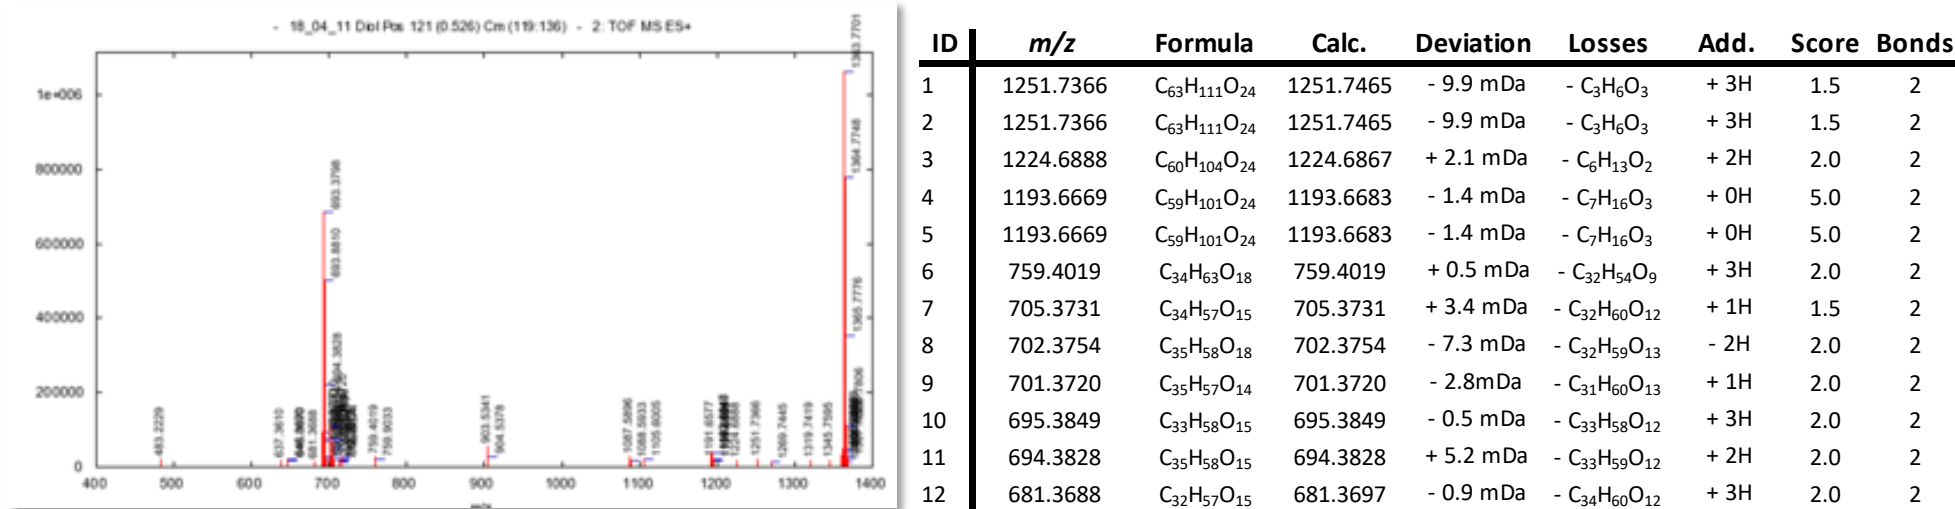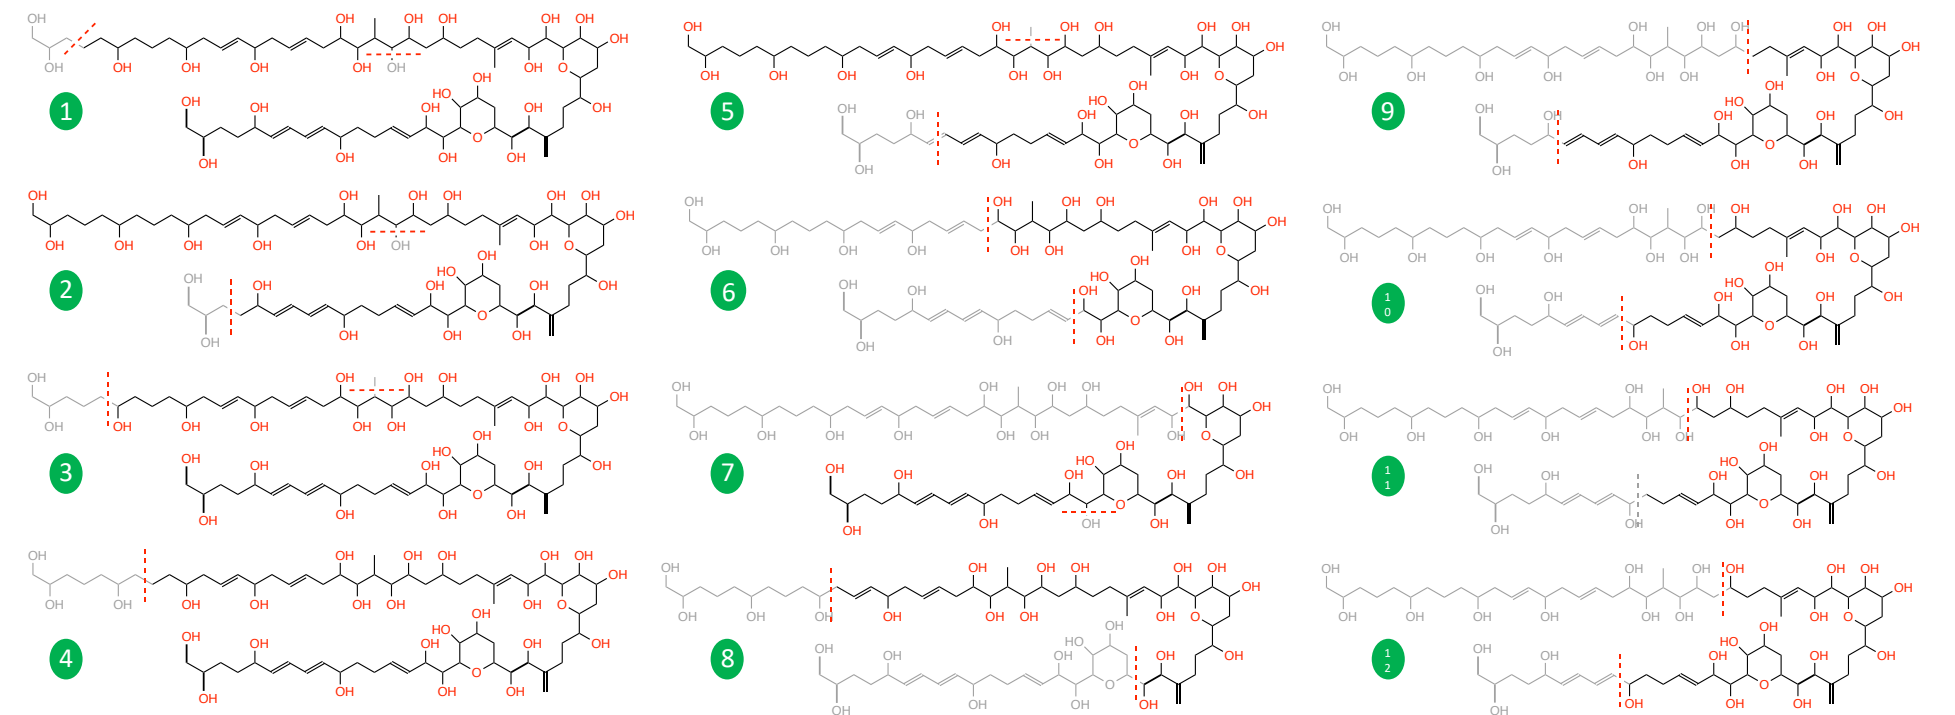

**Figure S18.**  $^1\text{H}$  NMR spectrum (600 MHz,  $\text{CD}_3\text{OD}$ ) for amphidinol 25.

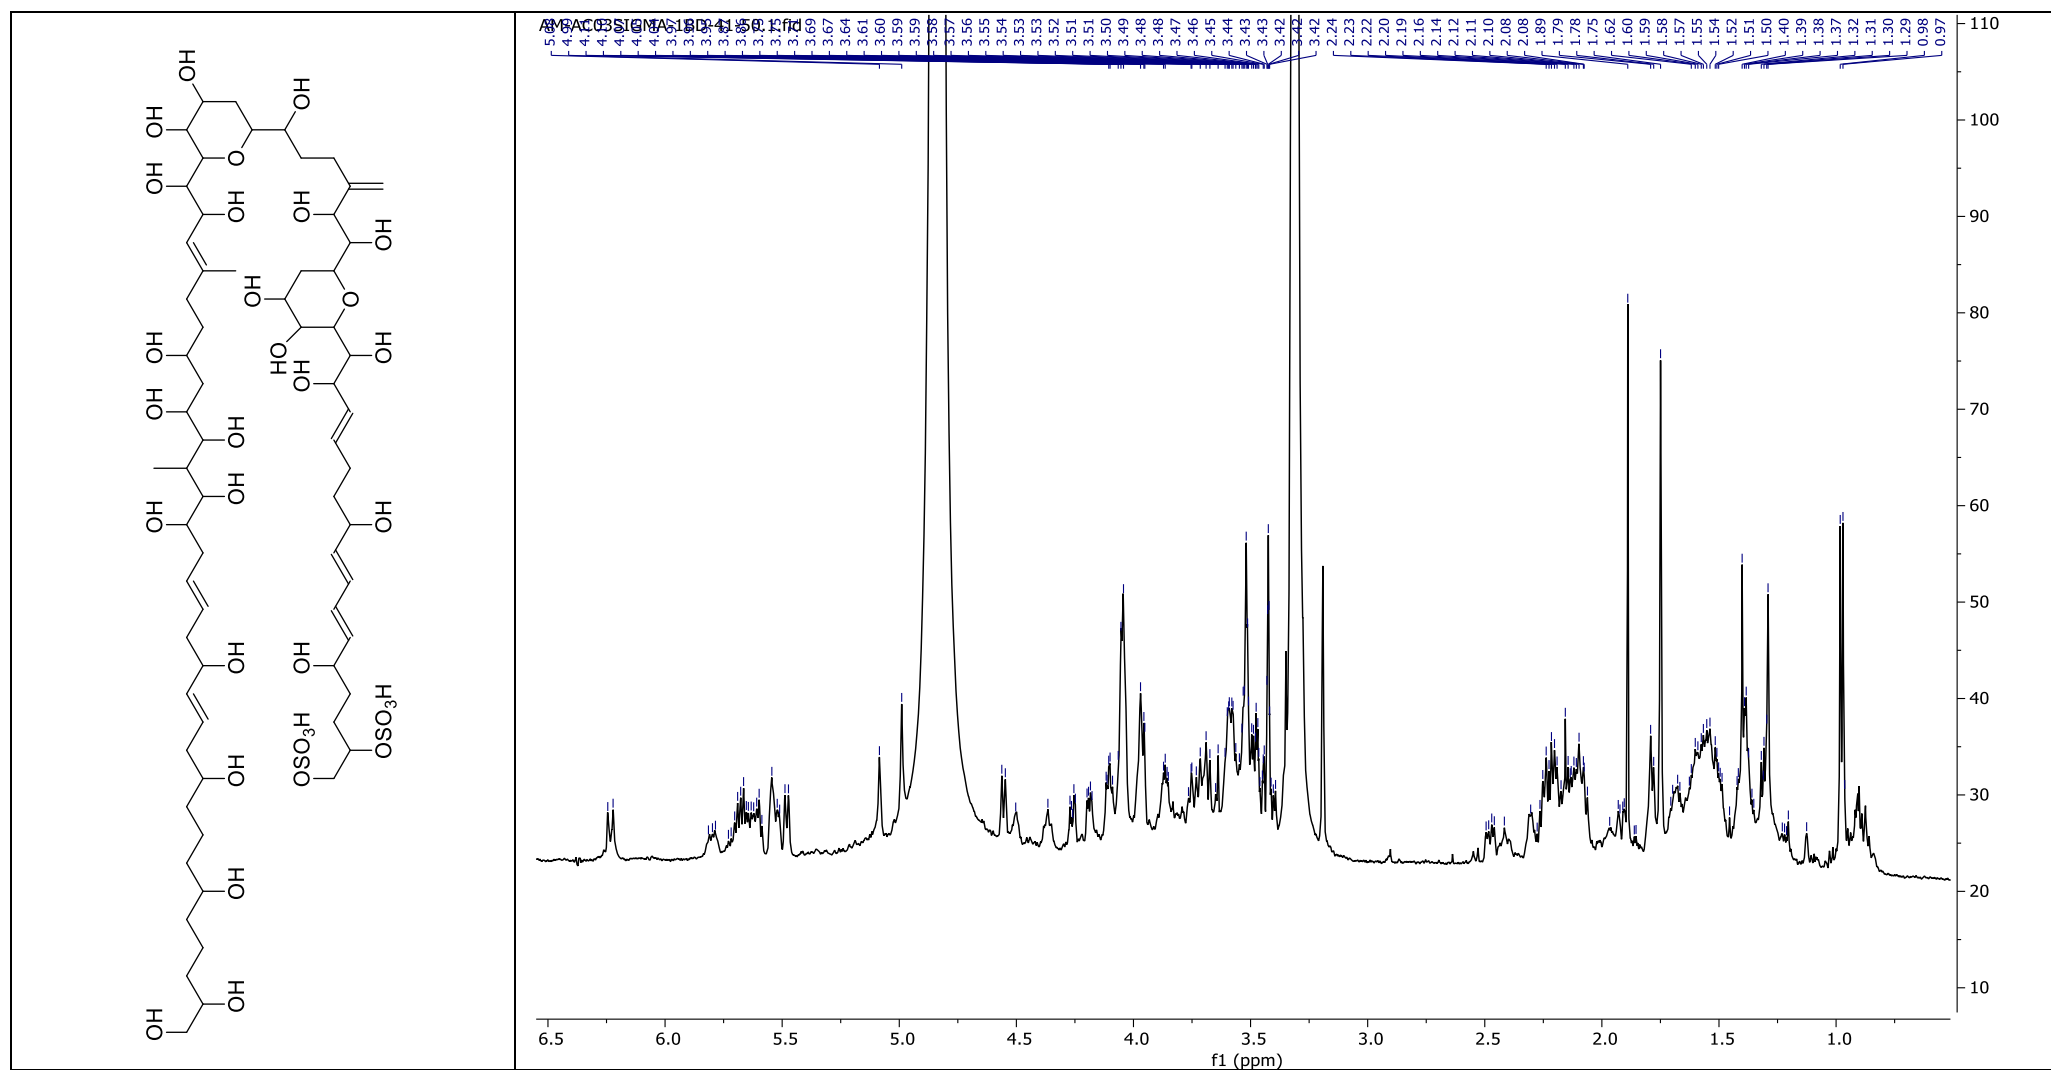

Figure S19. COSY spectrum (600 MHz, CD<sub>3</sub>OD) for amphidinol 25.

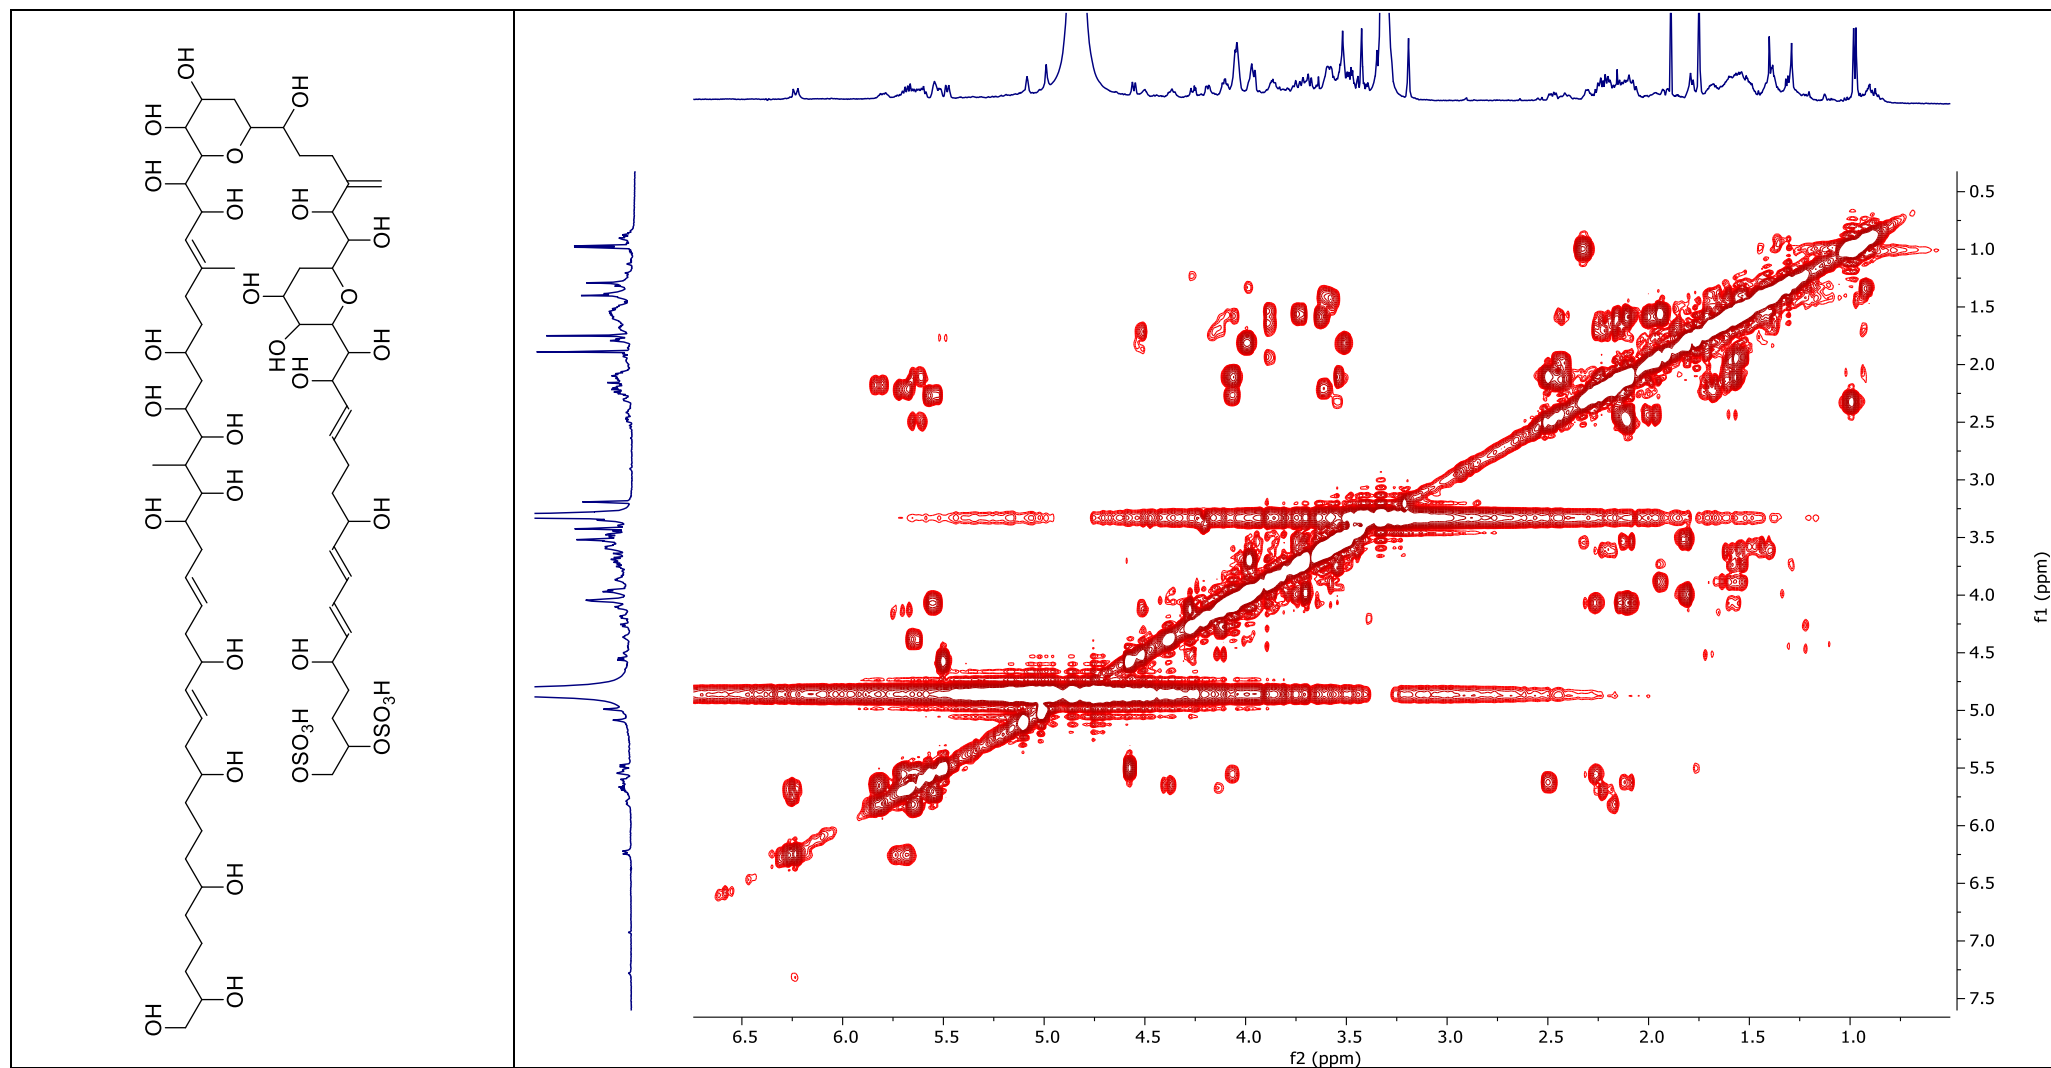

Figure S20. HSQC<sub>ed</sub> spectrum (600 MHz, CD<sub>3</sub>OD) for amphidinol 25.

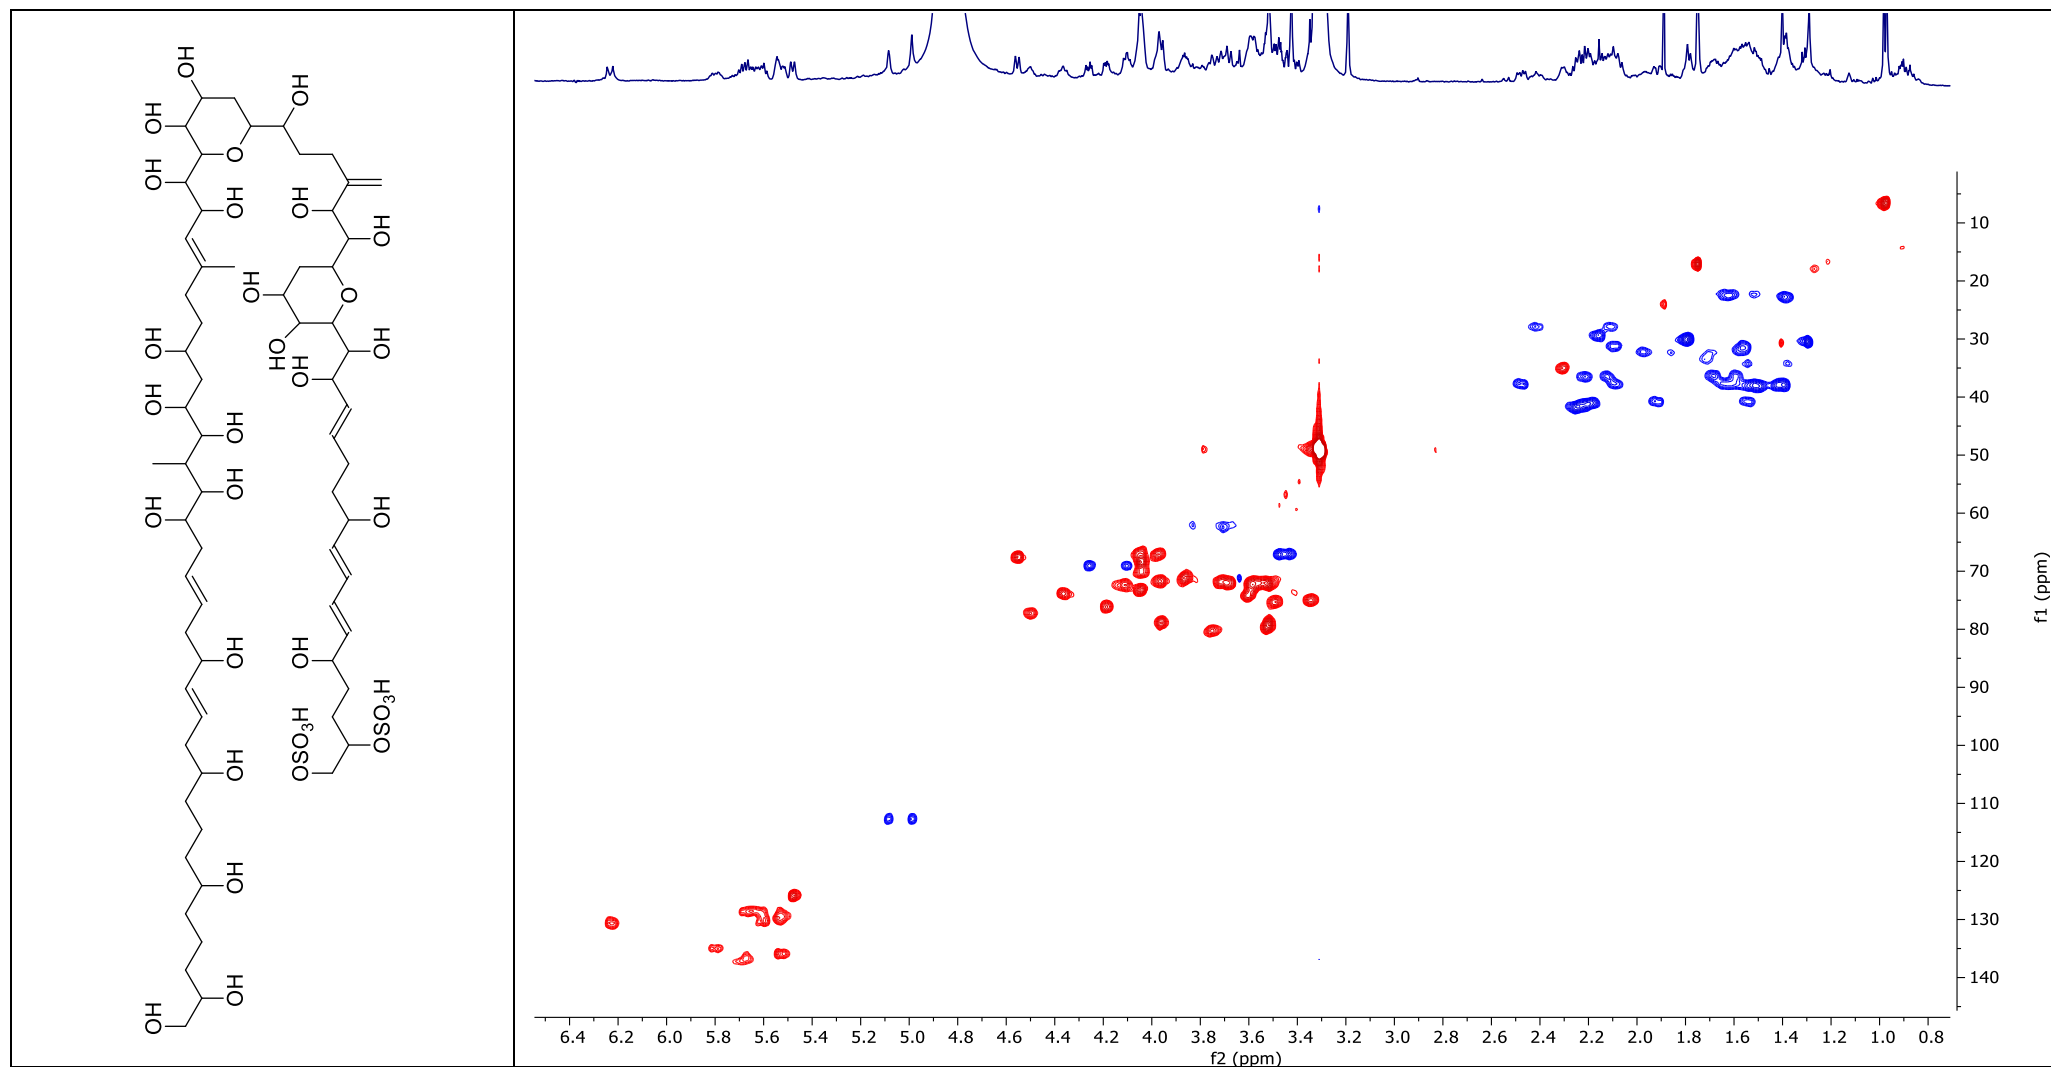

**Figure S21.** HSQC-TOCSY spectrum (600 MHz, CD<sub>3</sub>OD) for amphidinol 25.

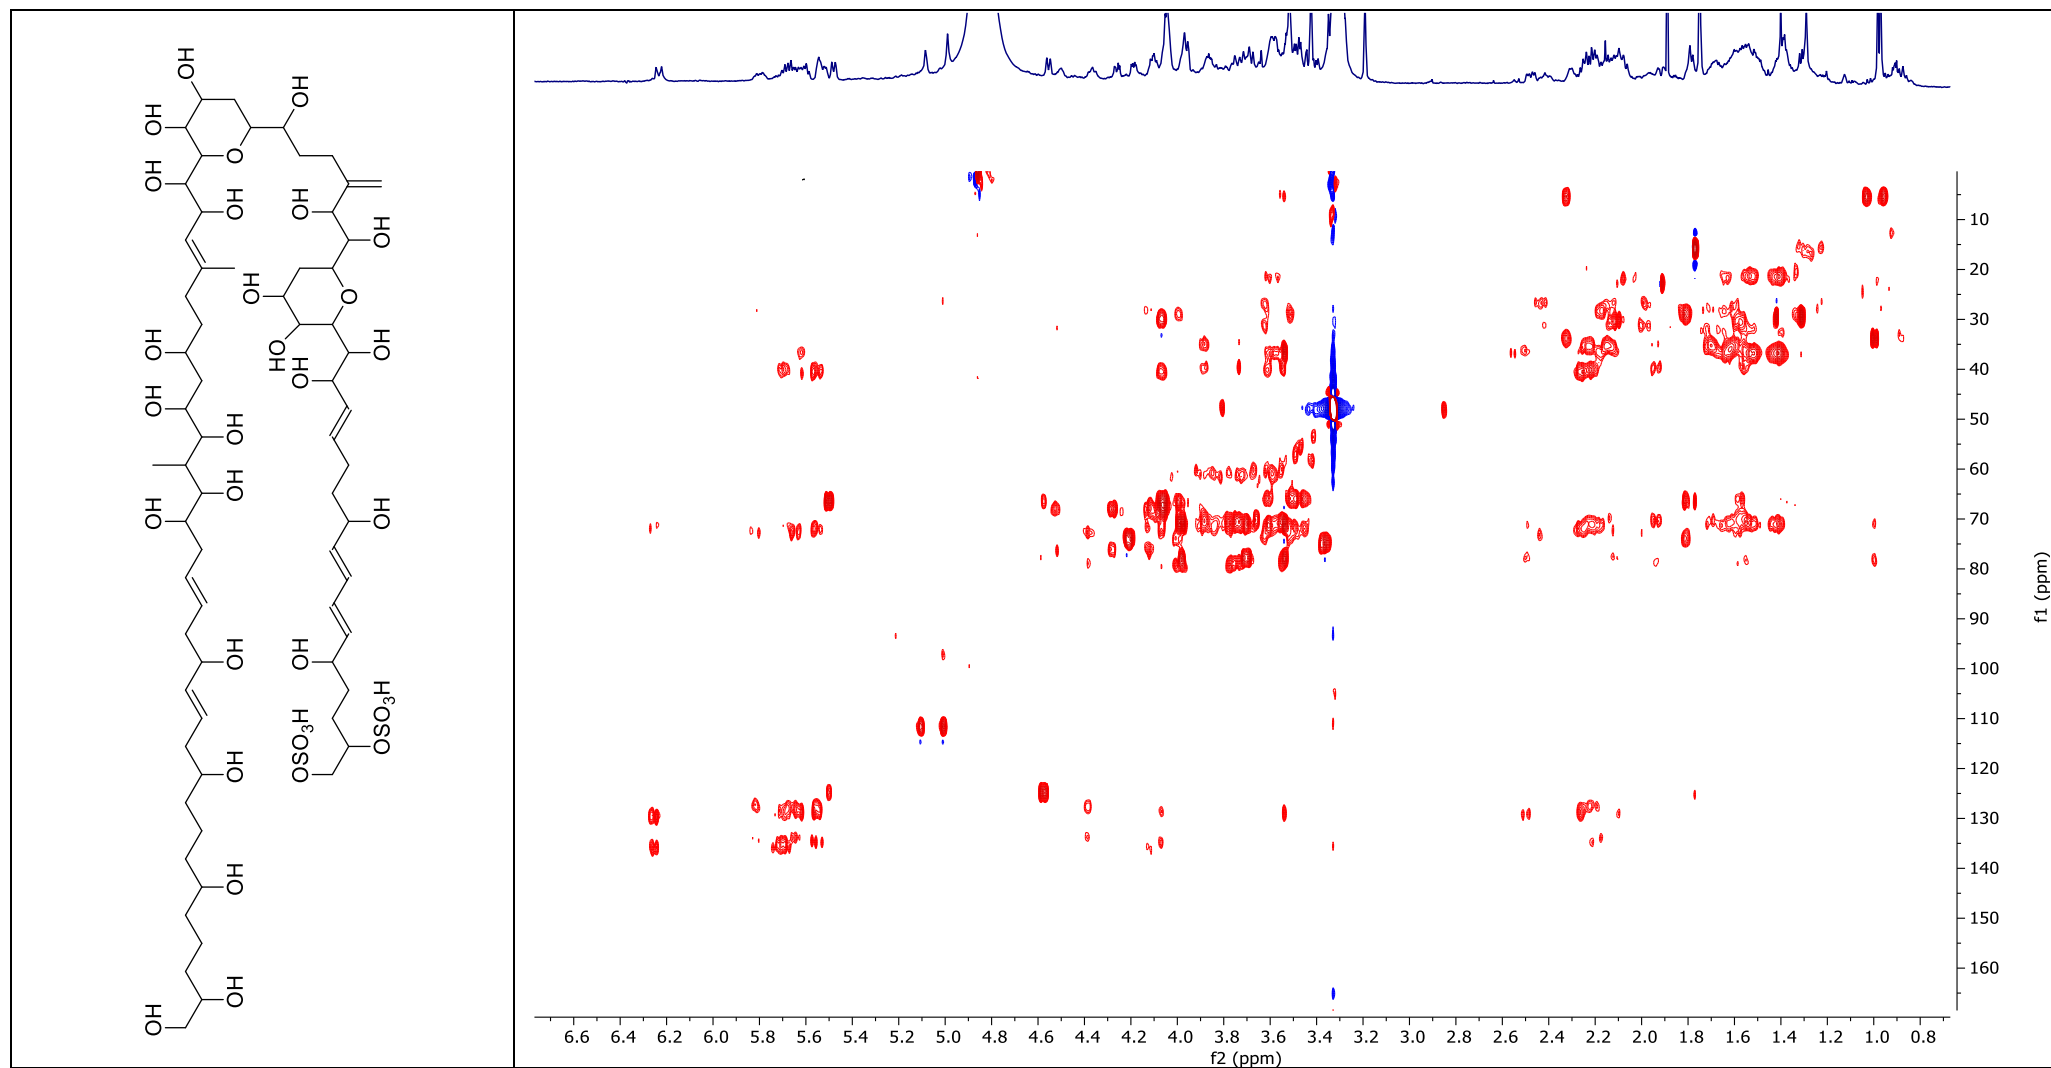



Figure S22. HMBC spectrum (600 MHz, CD<sub>3</sub>OD) for amphidinol 25.

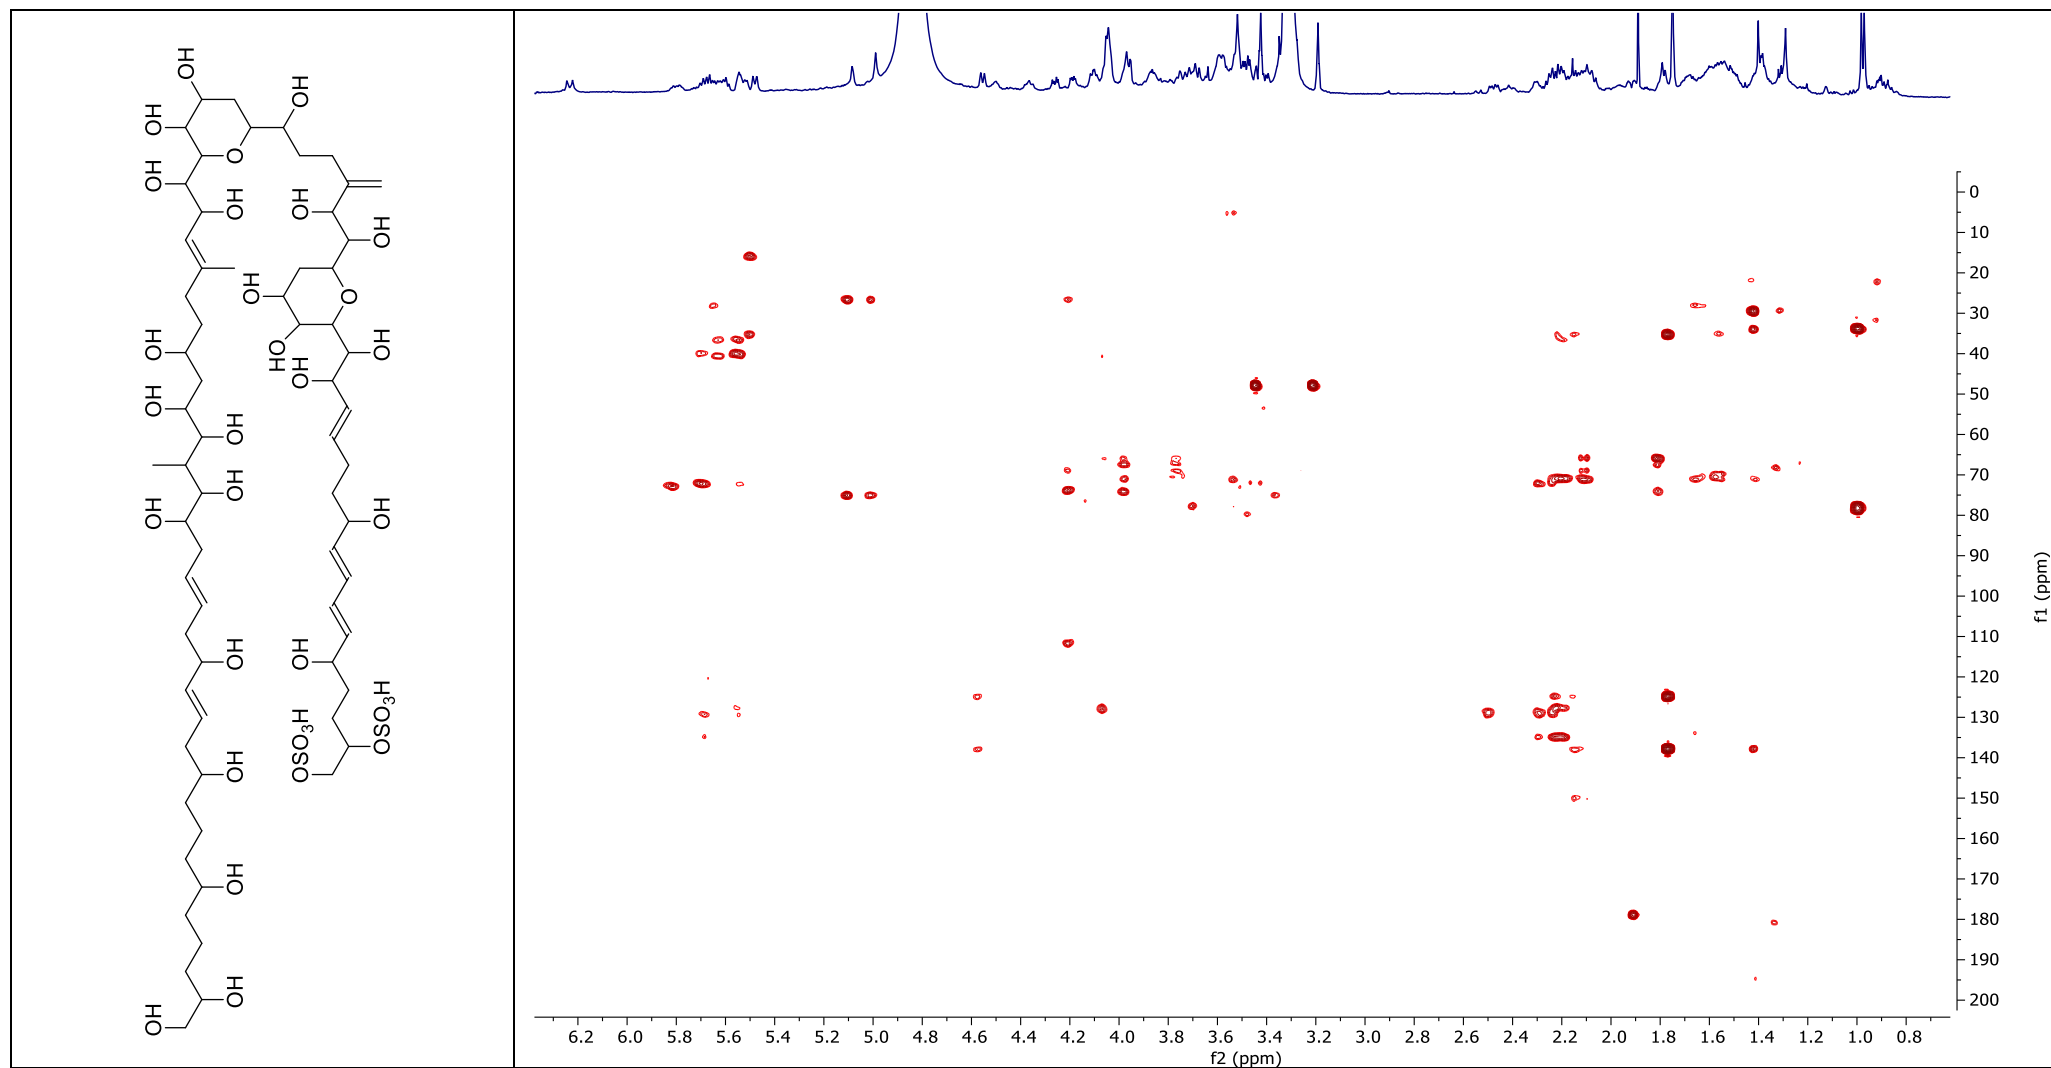

Figure S23. HRESIMS spectrum for amphidinol 25

Elemental Composition Report

Single Mass Analysis

Tolerance = 10.0 PPM / DBE: min = -50.0, max = 75.0  
Element prediction: Off  
Number of isotope peaks used for i-FIT = 3

Monoisotopic Mass, Odd and Even Electron Ions  
1111 formula(e) evaluated with 31 results within limits (all results (up to 1000) for each mass)  
Elements Used:  
C: 5-80 H: 0-150 O: 0-40 Na: 0-1 S: 0-2  
18\_04\_11 Sulfatado NEG 161 (0.694) Cm (159:177)  
1: TOF MS ES-

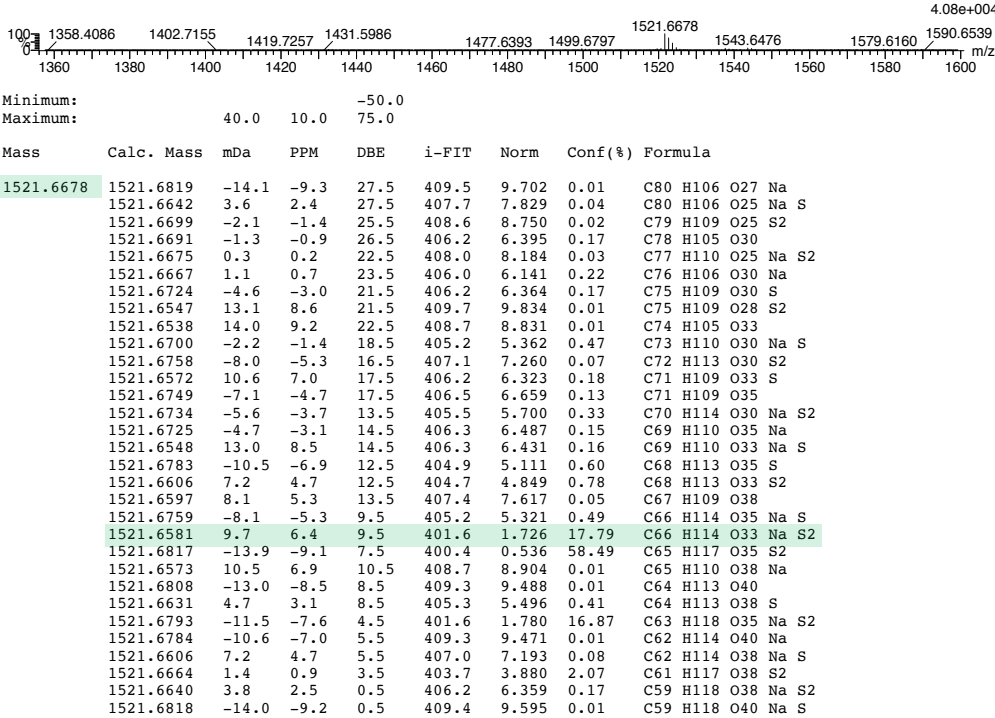

Figure S24. Main MS/MS fragments observed for amphidinol 25.

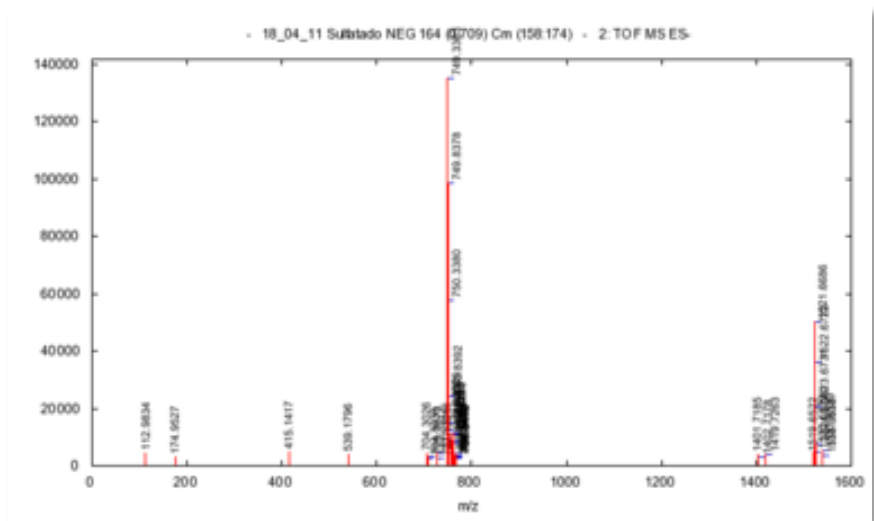

Figure S25.  $^1\text{H}$  NMR spectrum (600 MHz,  $\text{CD}_3\text{OD}$ ) for amphidinol 26.

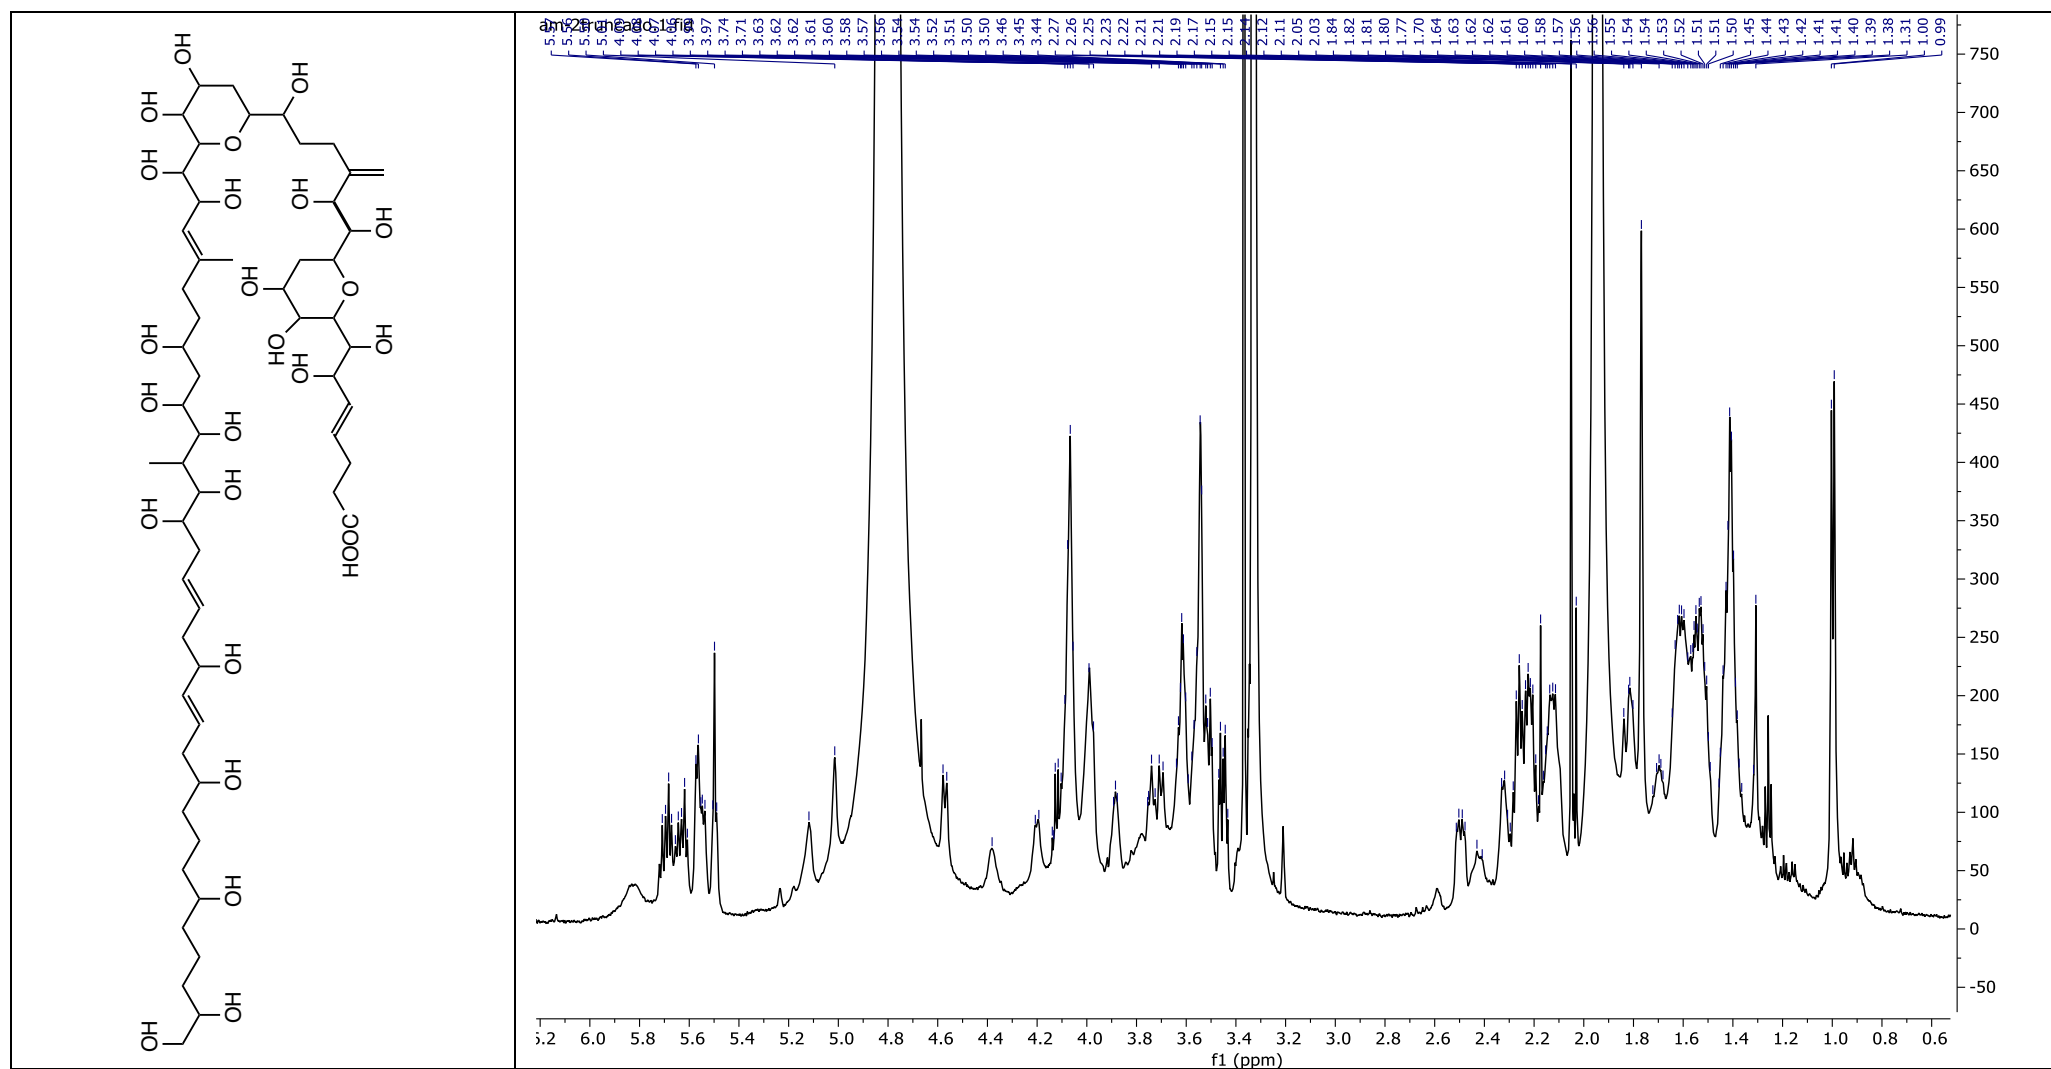

**Figure S26.** COSY spectrum (600 MHz, CD<sub>3</sub>OD) for amphidinol 26.

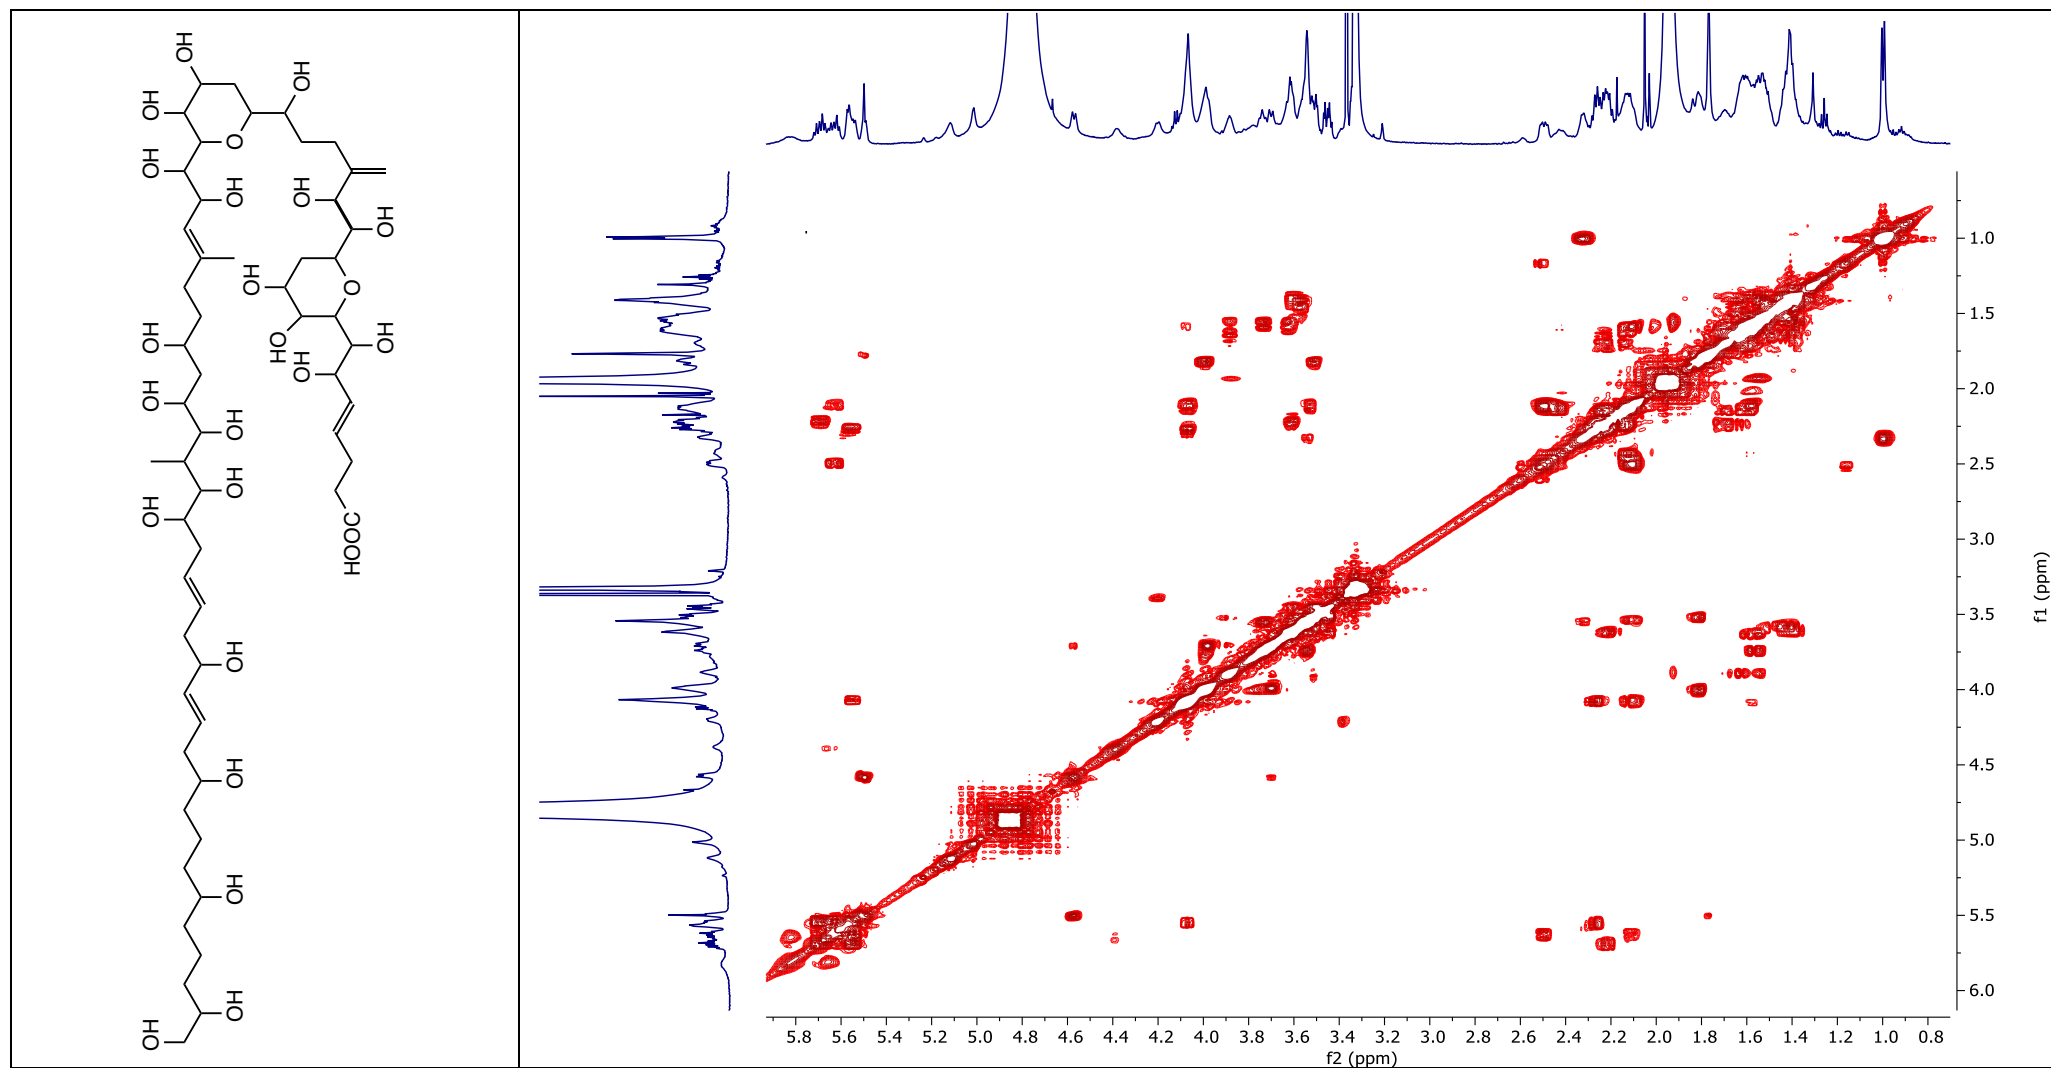

Figure S27. HSQC<sub>ed</sub> spectrum (600 MHz, CD<sub>3</sub>OD) for amphidinol 26.

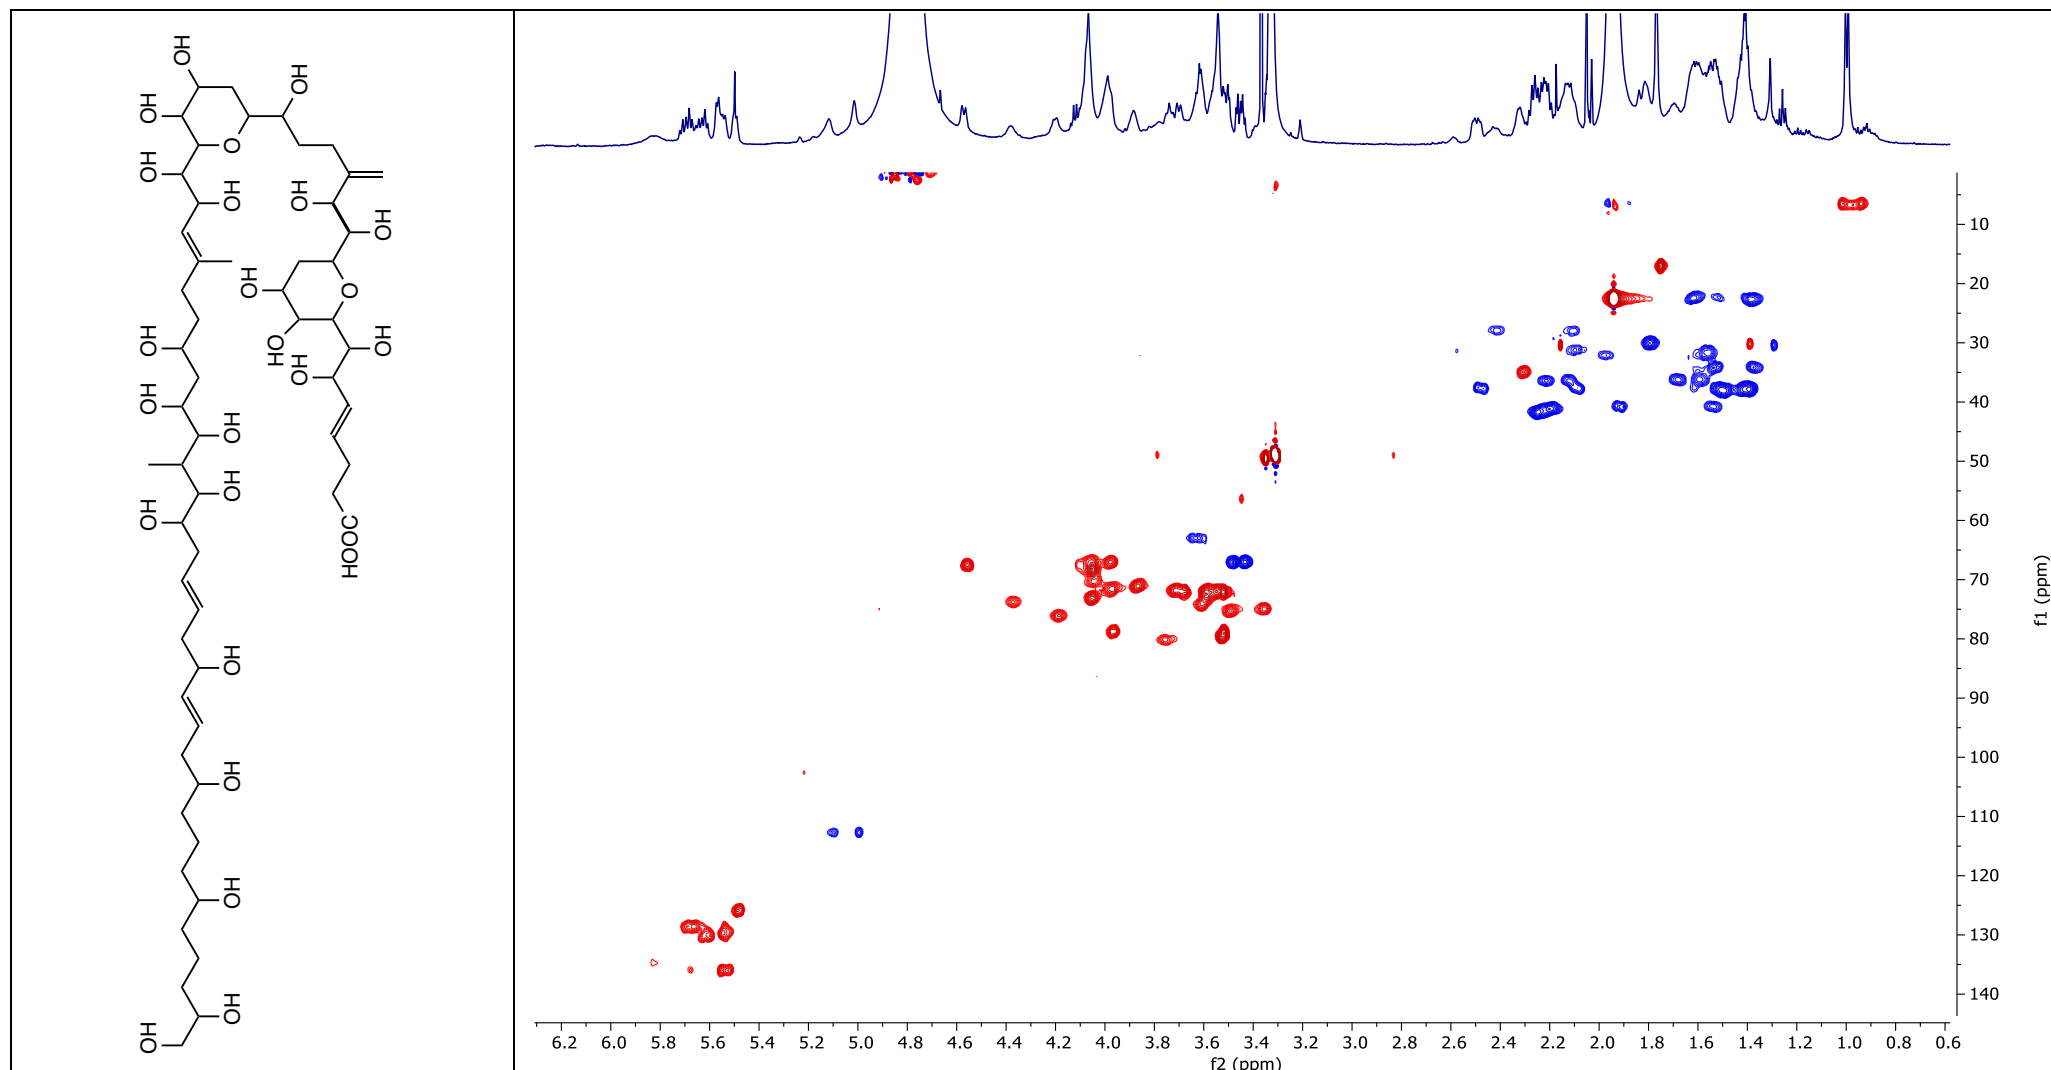

**Figure S28.** HSQC-TOCSY spectrum (600 MHz, CD<sub>3</sub>OD) for amphidinol 26.

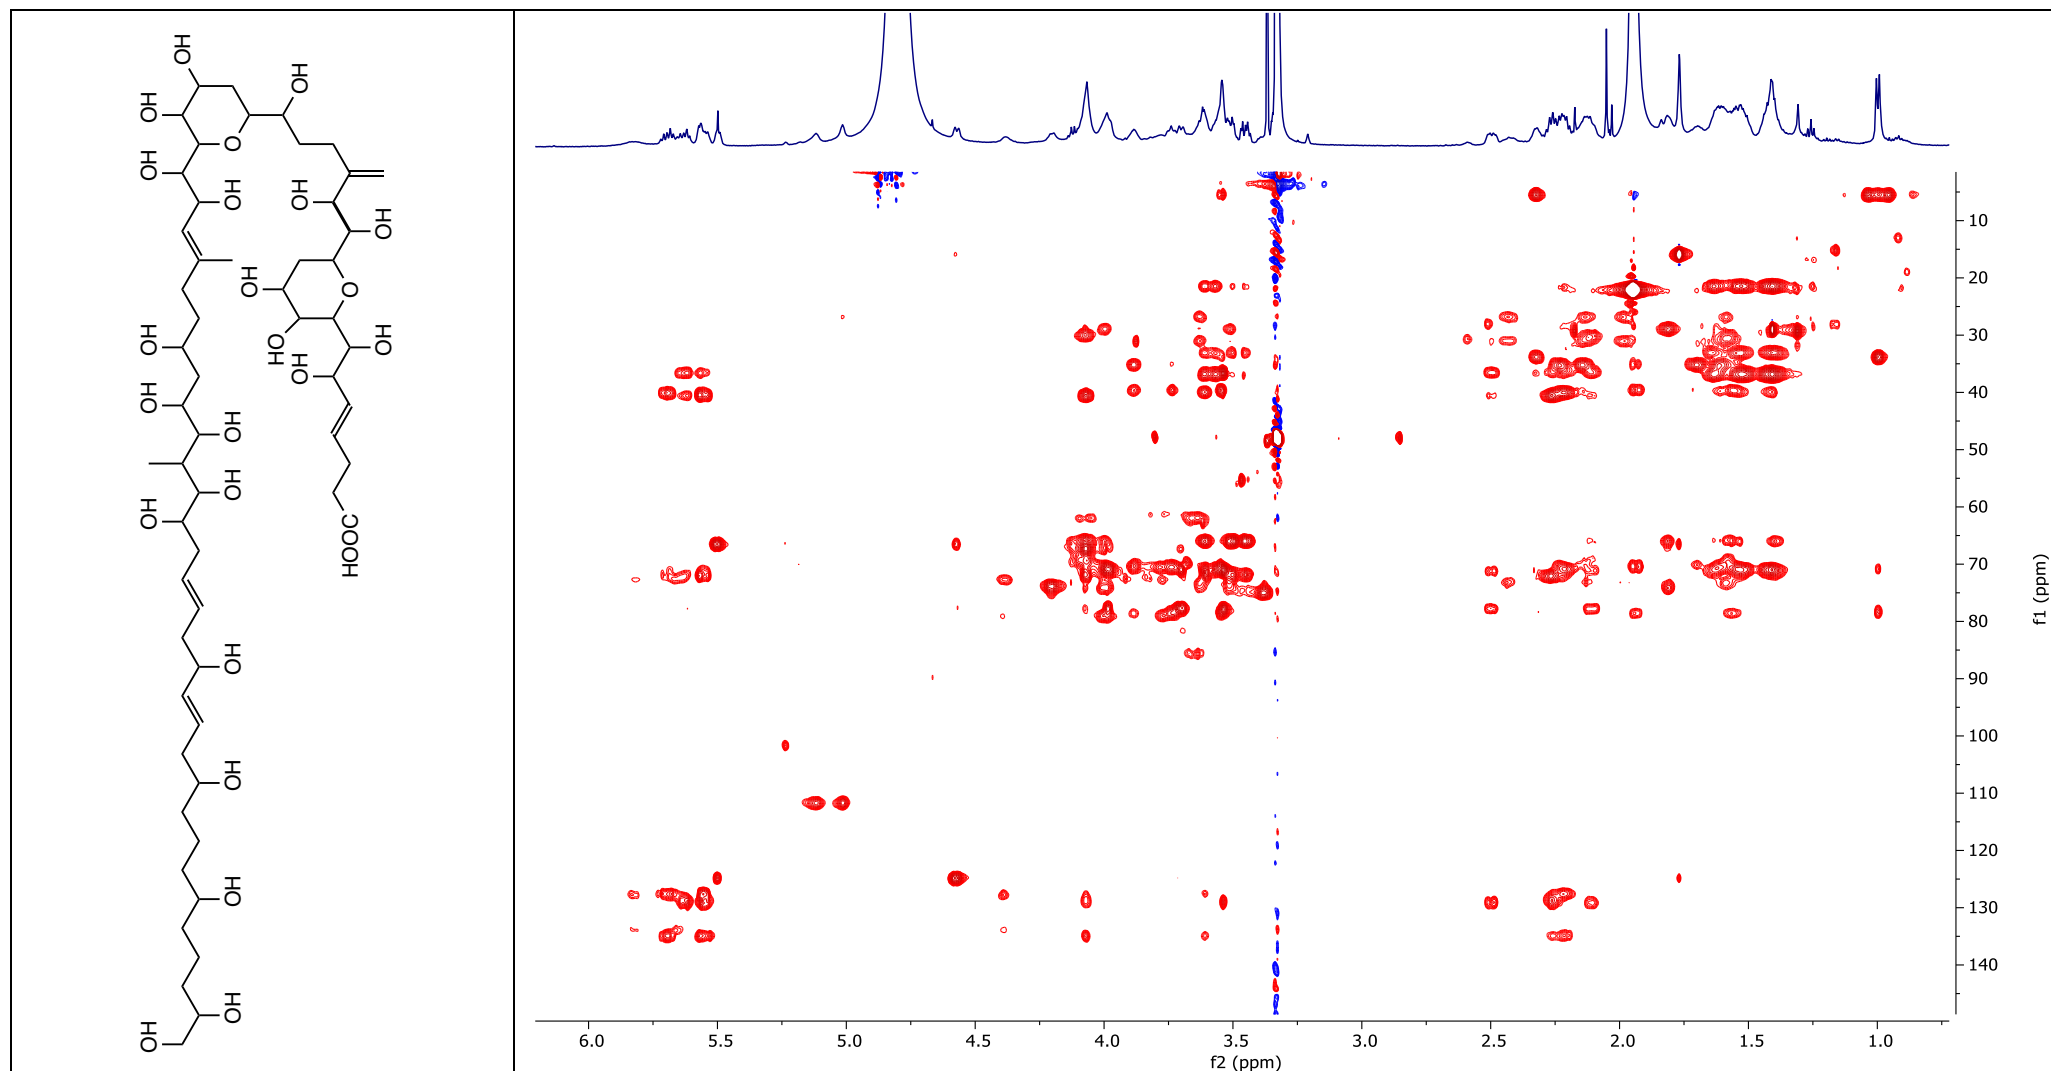

Figure S29. HMBC spectrum (600 MHz, CD<sub>3</sub>OD) for amphidinol 26.

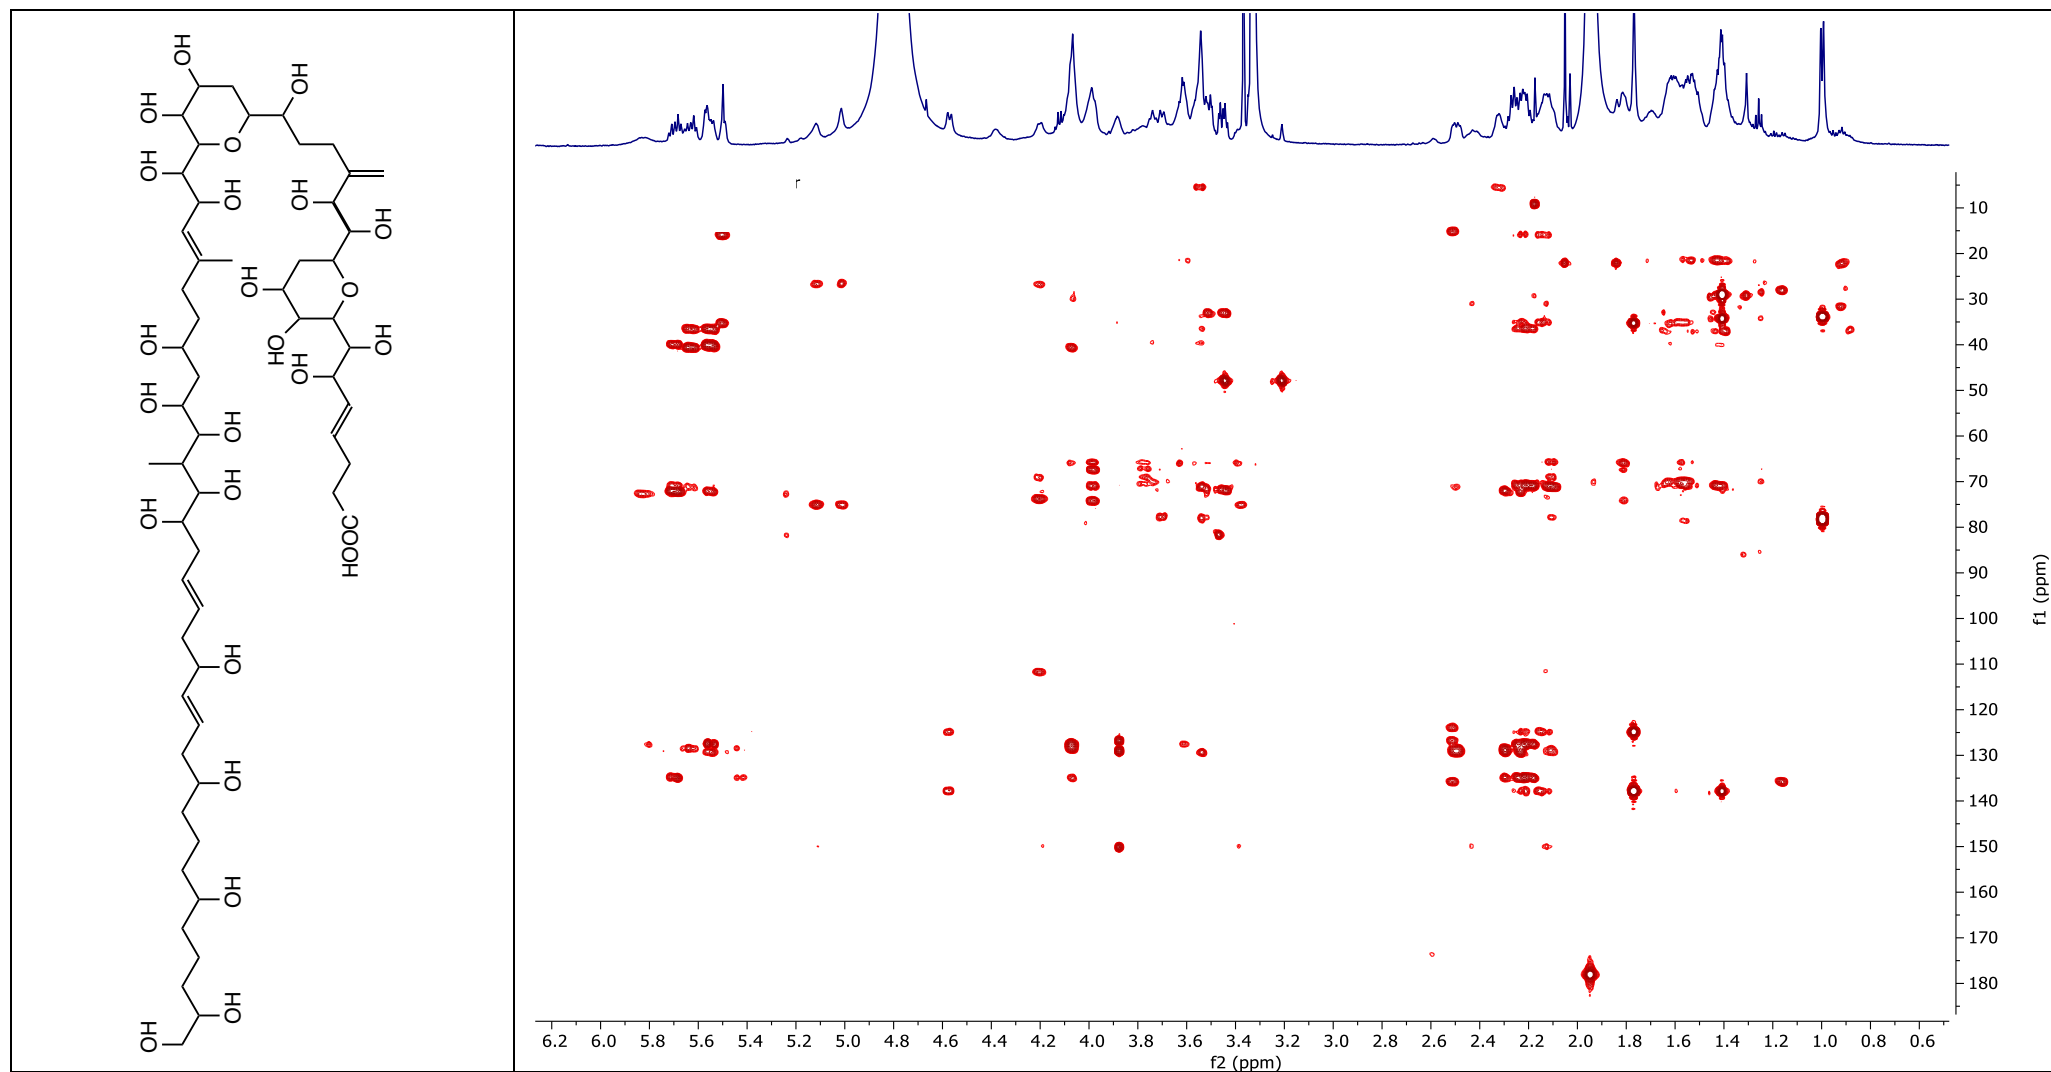



**Figure S30.** H2BC spectrum (600 MHz, CD<sub>3</sub>OD) for amphidinol 26.

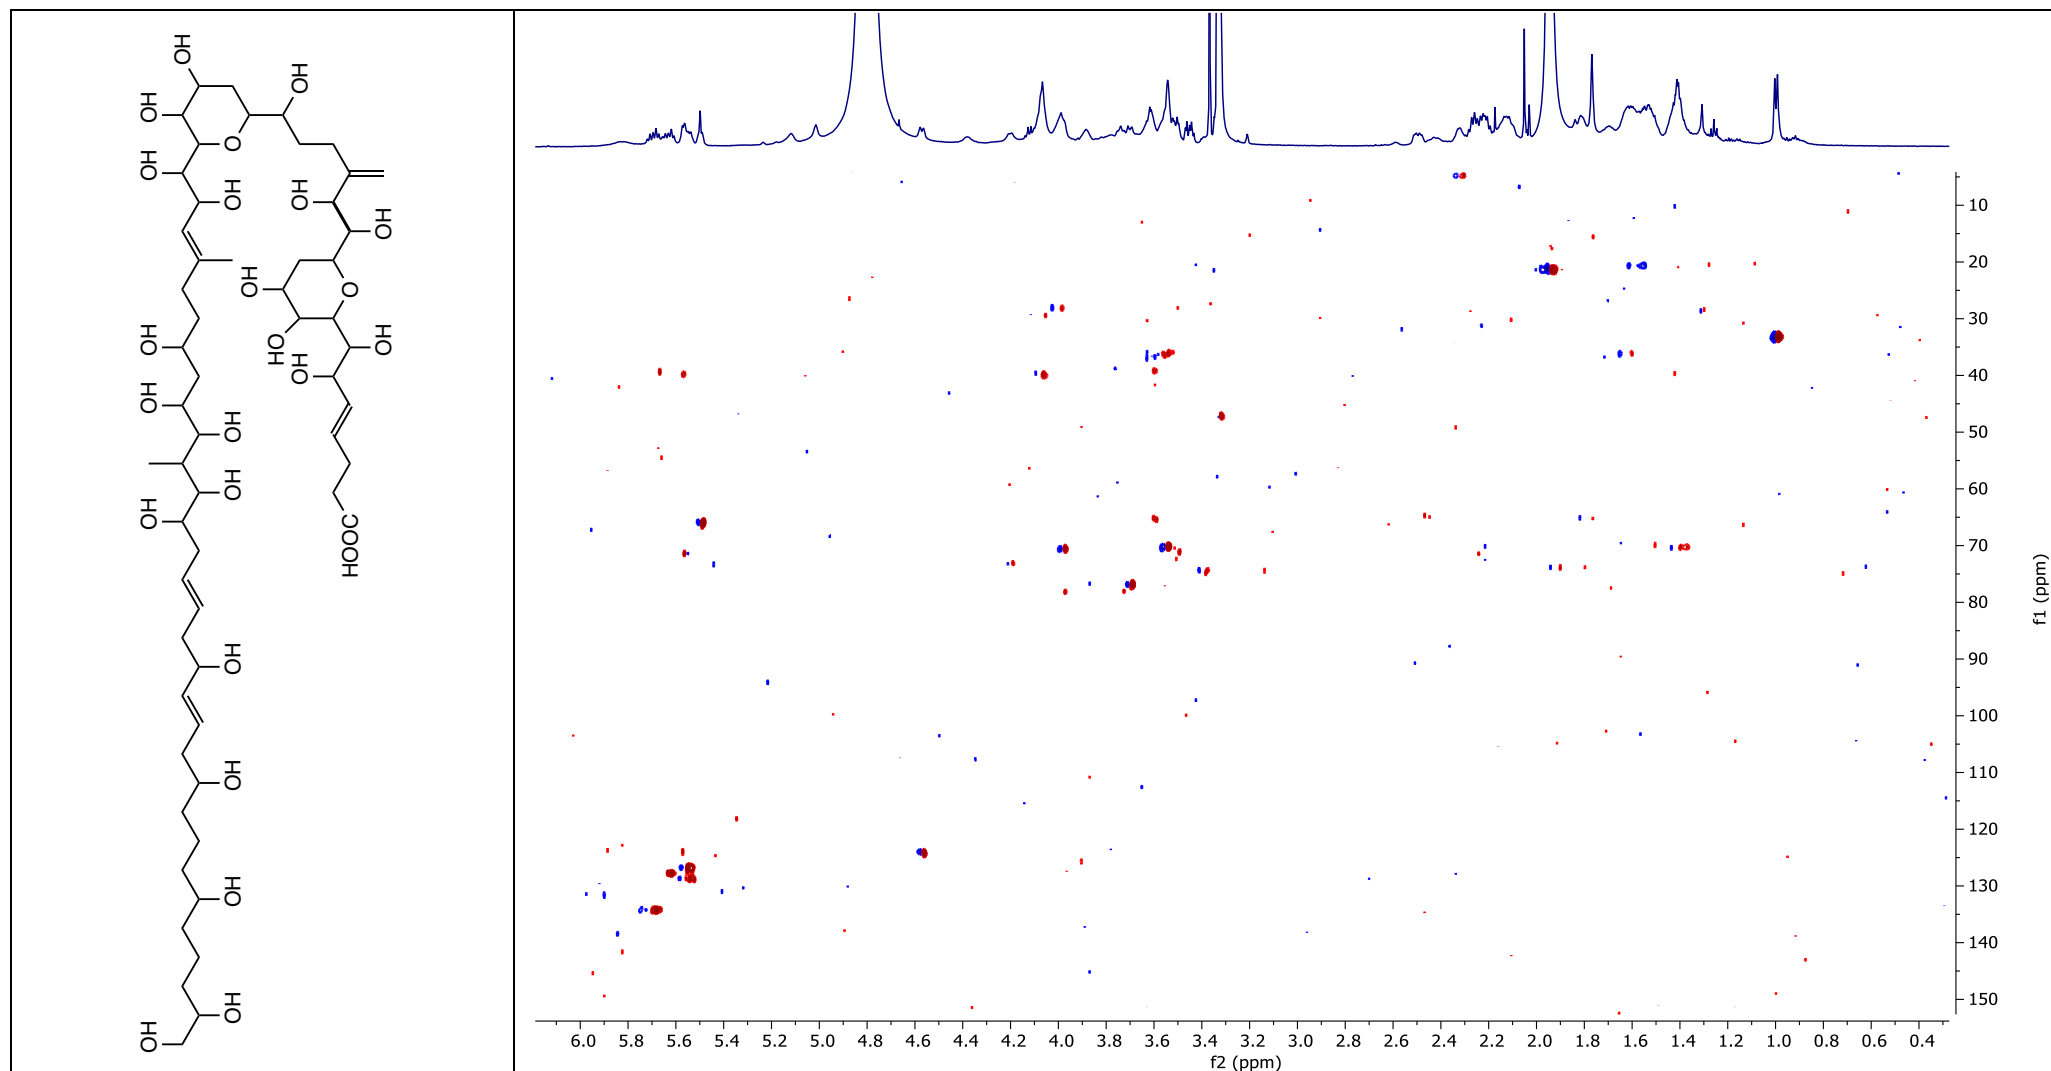

Figure S31. T-ROESY spectrum (600 MHz, CD<sub>3</sub>OD) for amphidinol 26.

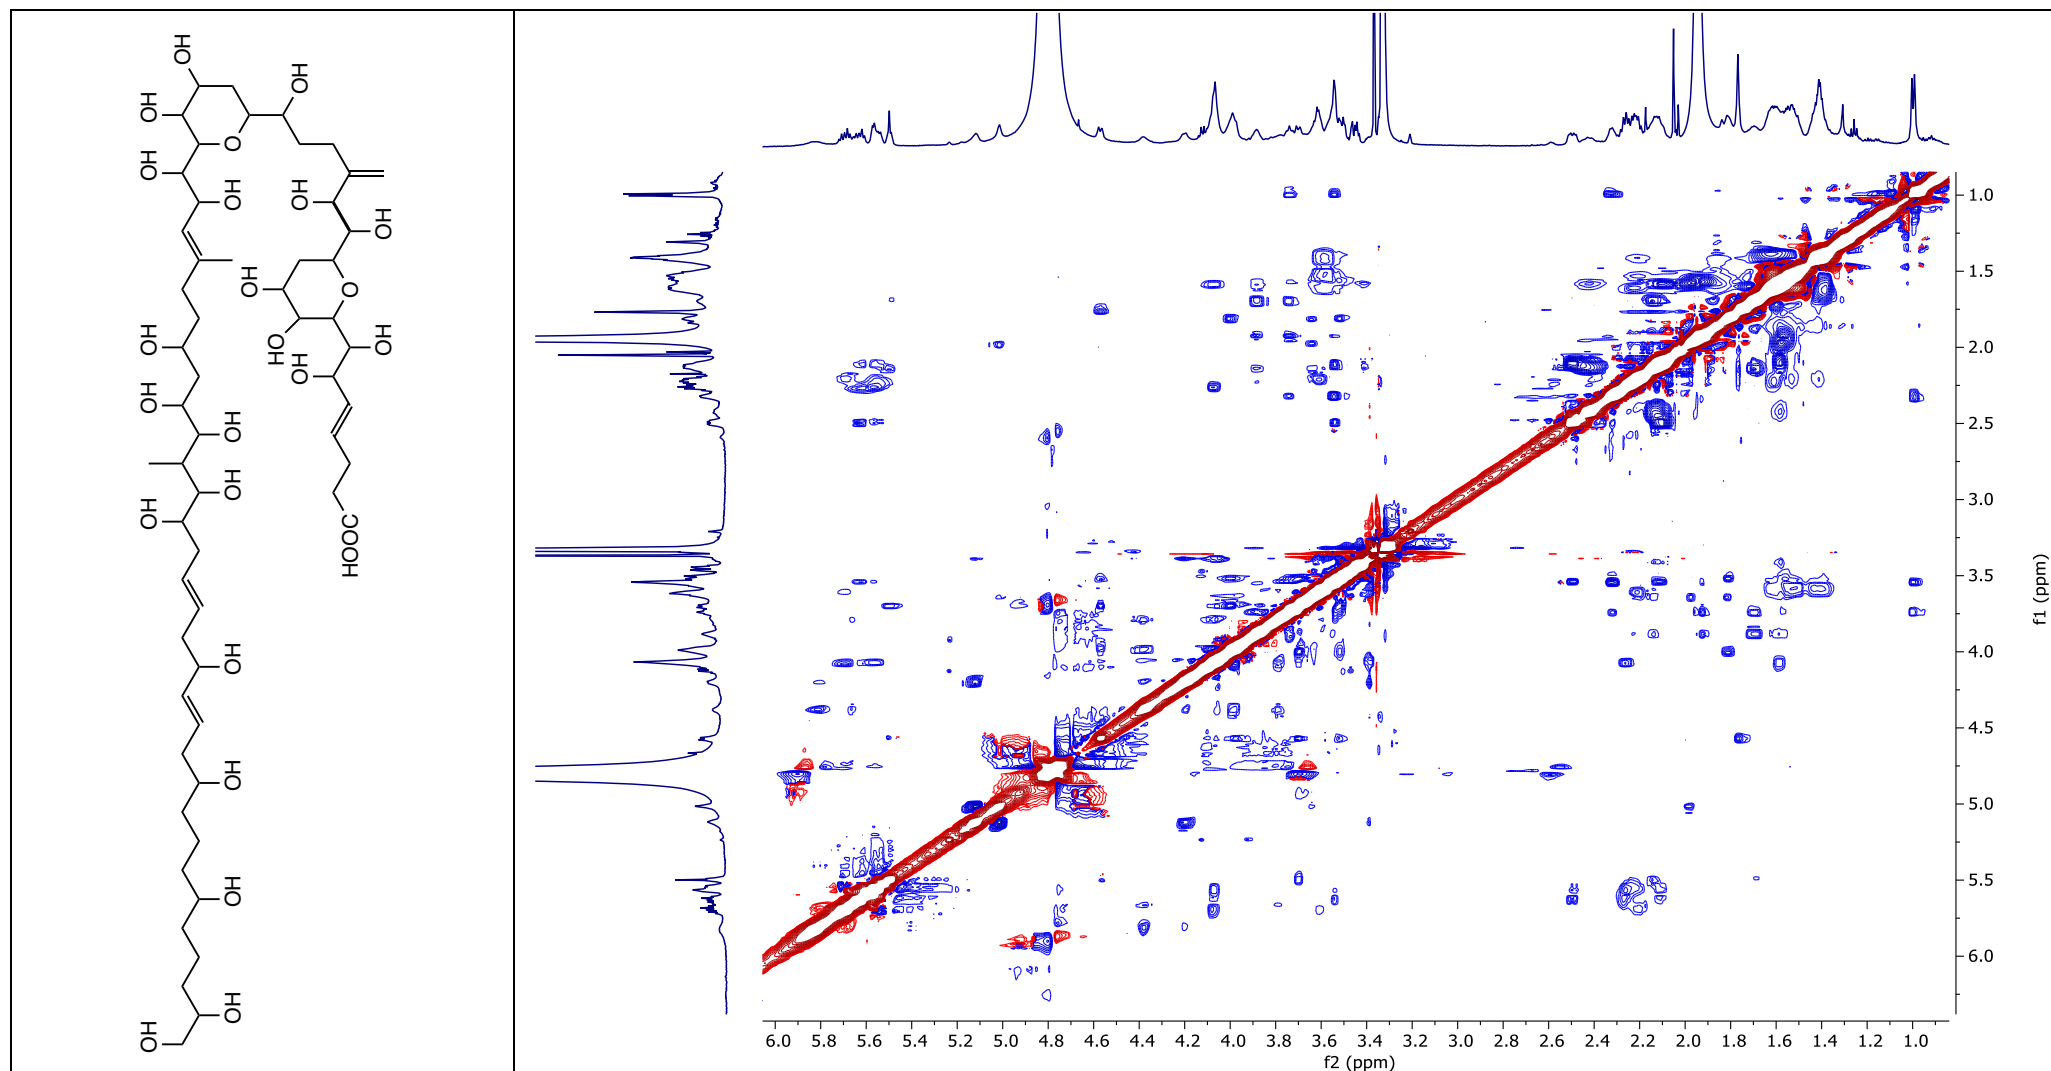

Figure S32. HRESIMS spectrum for amphidinol 26.

Elemental Composition Report

Page 1

Multiple Mass Analysis: 3 mass(es) processed

Tolerance = 5.0 PPM / DBE: min = -1.5, max = 120.0

Element prediction: Off

Number of isotope peaks used for i-FIT = 3

Monoisotopic Mass, Even Electron Ions

325 formula(e) evaluated with 5 results within limits (all results (up to 1000) for each mass)

Elements Used:

C: 0-60 H: 0-110 O: 0-25 Na: 0-2

David

ESI (17-159) Adrian (ACO35CI8MAC) 51 (1.778)

2: TOF MS ES+  
1.68e+002

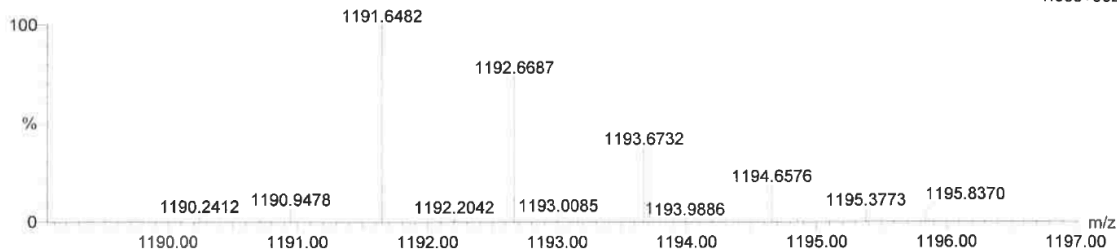

Minimum: 20.00

Maximum: 100.00

5.0 5.0 -1.5

120.0

| Mass      | RA     | Calc. Mass | mDa  | PPM  | DBE  | i-FIT | i-FIT (Norm) | Formula          |
|-----------|--------|------------|------|------|------|-------|--------------|------------------|
| 1191.6482 | 100.00 | 1191.6526  | -4.4 | -3.7 | 10.5 | 26.5  | 0.5          | C59 H99 O24      |
|           |        | 1191.6502  | -2.0 | -1.7 | 7.5  | 27.2  | 1.3          | C57 H100 O24 Na  |
|           |        | 1191.6478  | 0.4  | 0.3  | 4.5  | 28.1  | 2.2          | C55 H101 O24 Na2 |
| 1192.6687 | 73.82  | ---        | ---  | ---  | ---  | ---   | ---          | ---              |
| 1193.6732 | 37.73  | 1193.6683  | 4.9  | 4.1  | 9.5  | 33.5  | 0.4          | C59 H101 O24     |
|           |        | 1193.6787  | -5.5 | -4.6 | 7.5  | 34.4  | 1.2          | C59 H103 O21 Na2 |

**Figure S33.** Amphidinol 26 conversion from aldehyde to carboxylic acid at C-54 observed by ESI-HRMS.

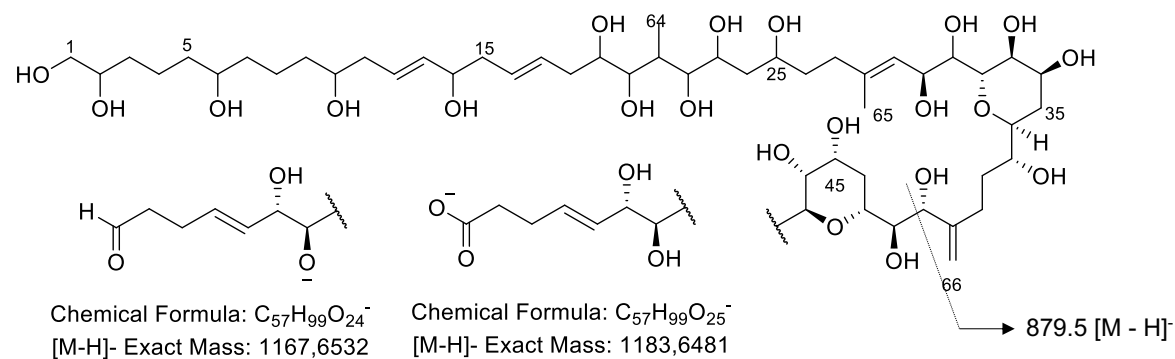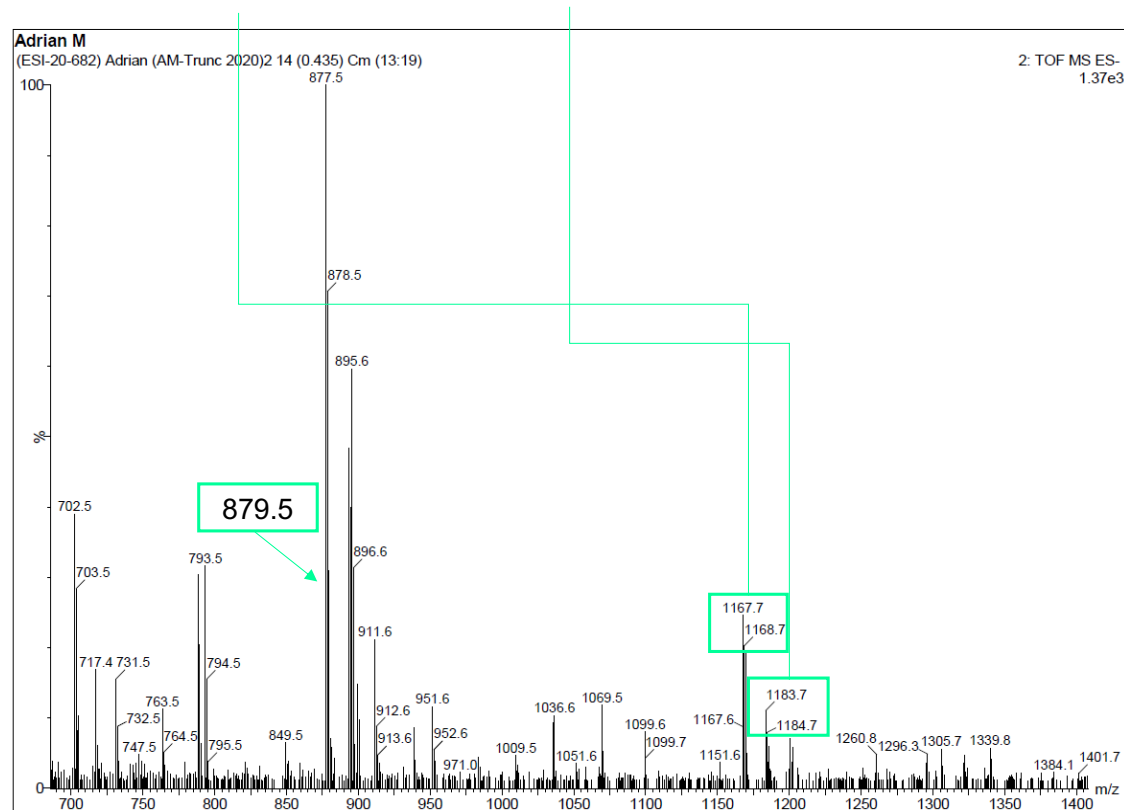

Figure S34. Amphidinol 26 single mass composition analysis for aldehyde and carboxylic states.

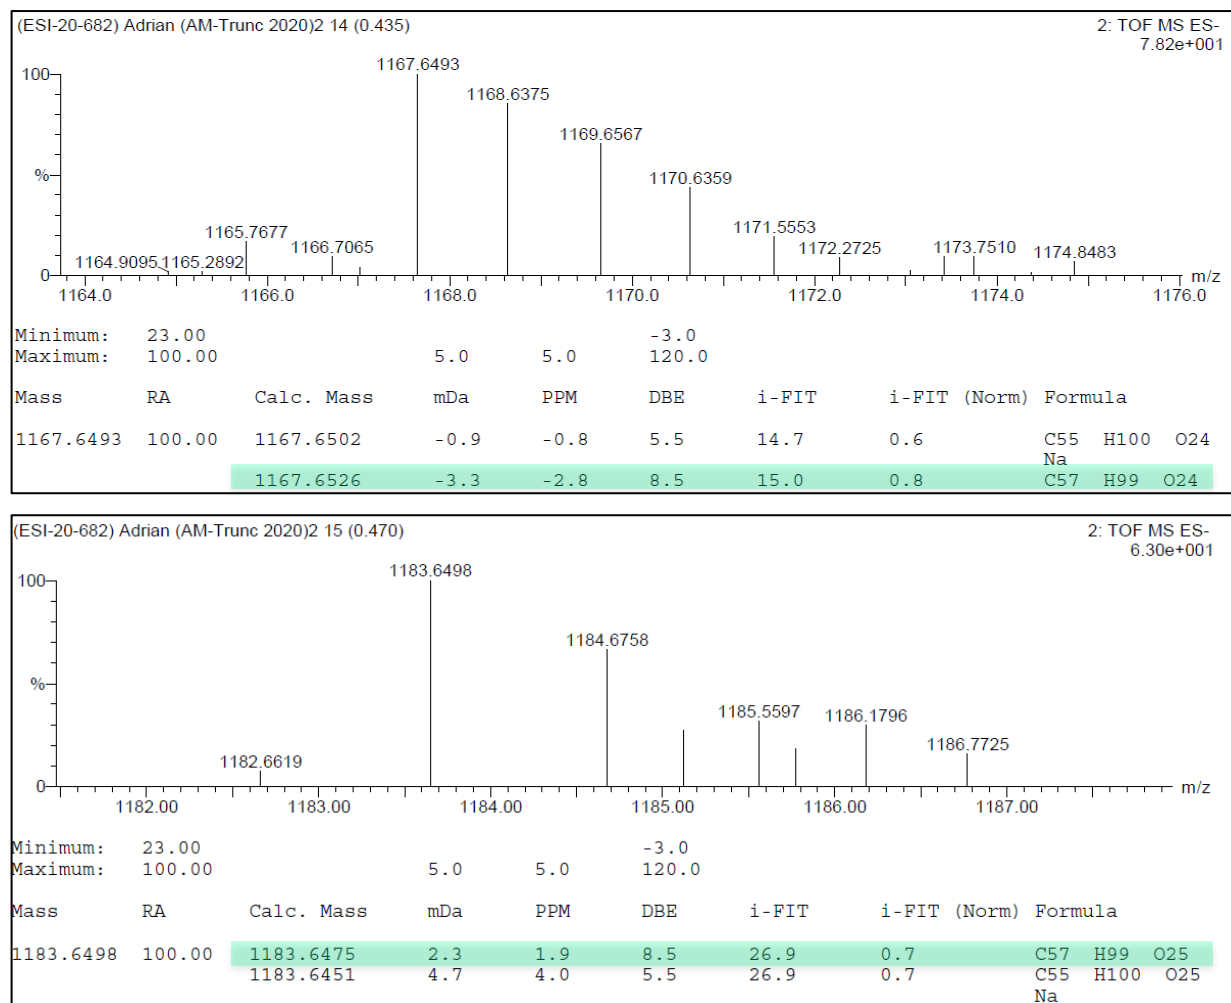

Figure S35. Main MS/MS fragments observed for amphidinol 26 as aldehyde.

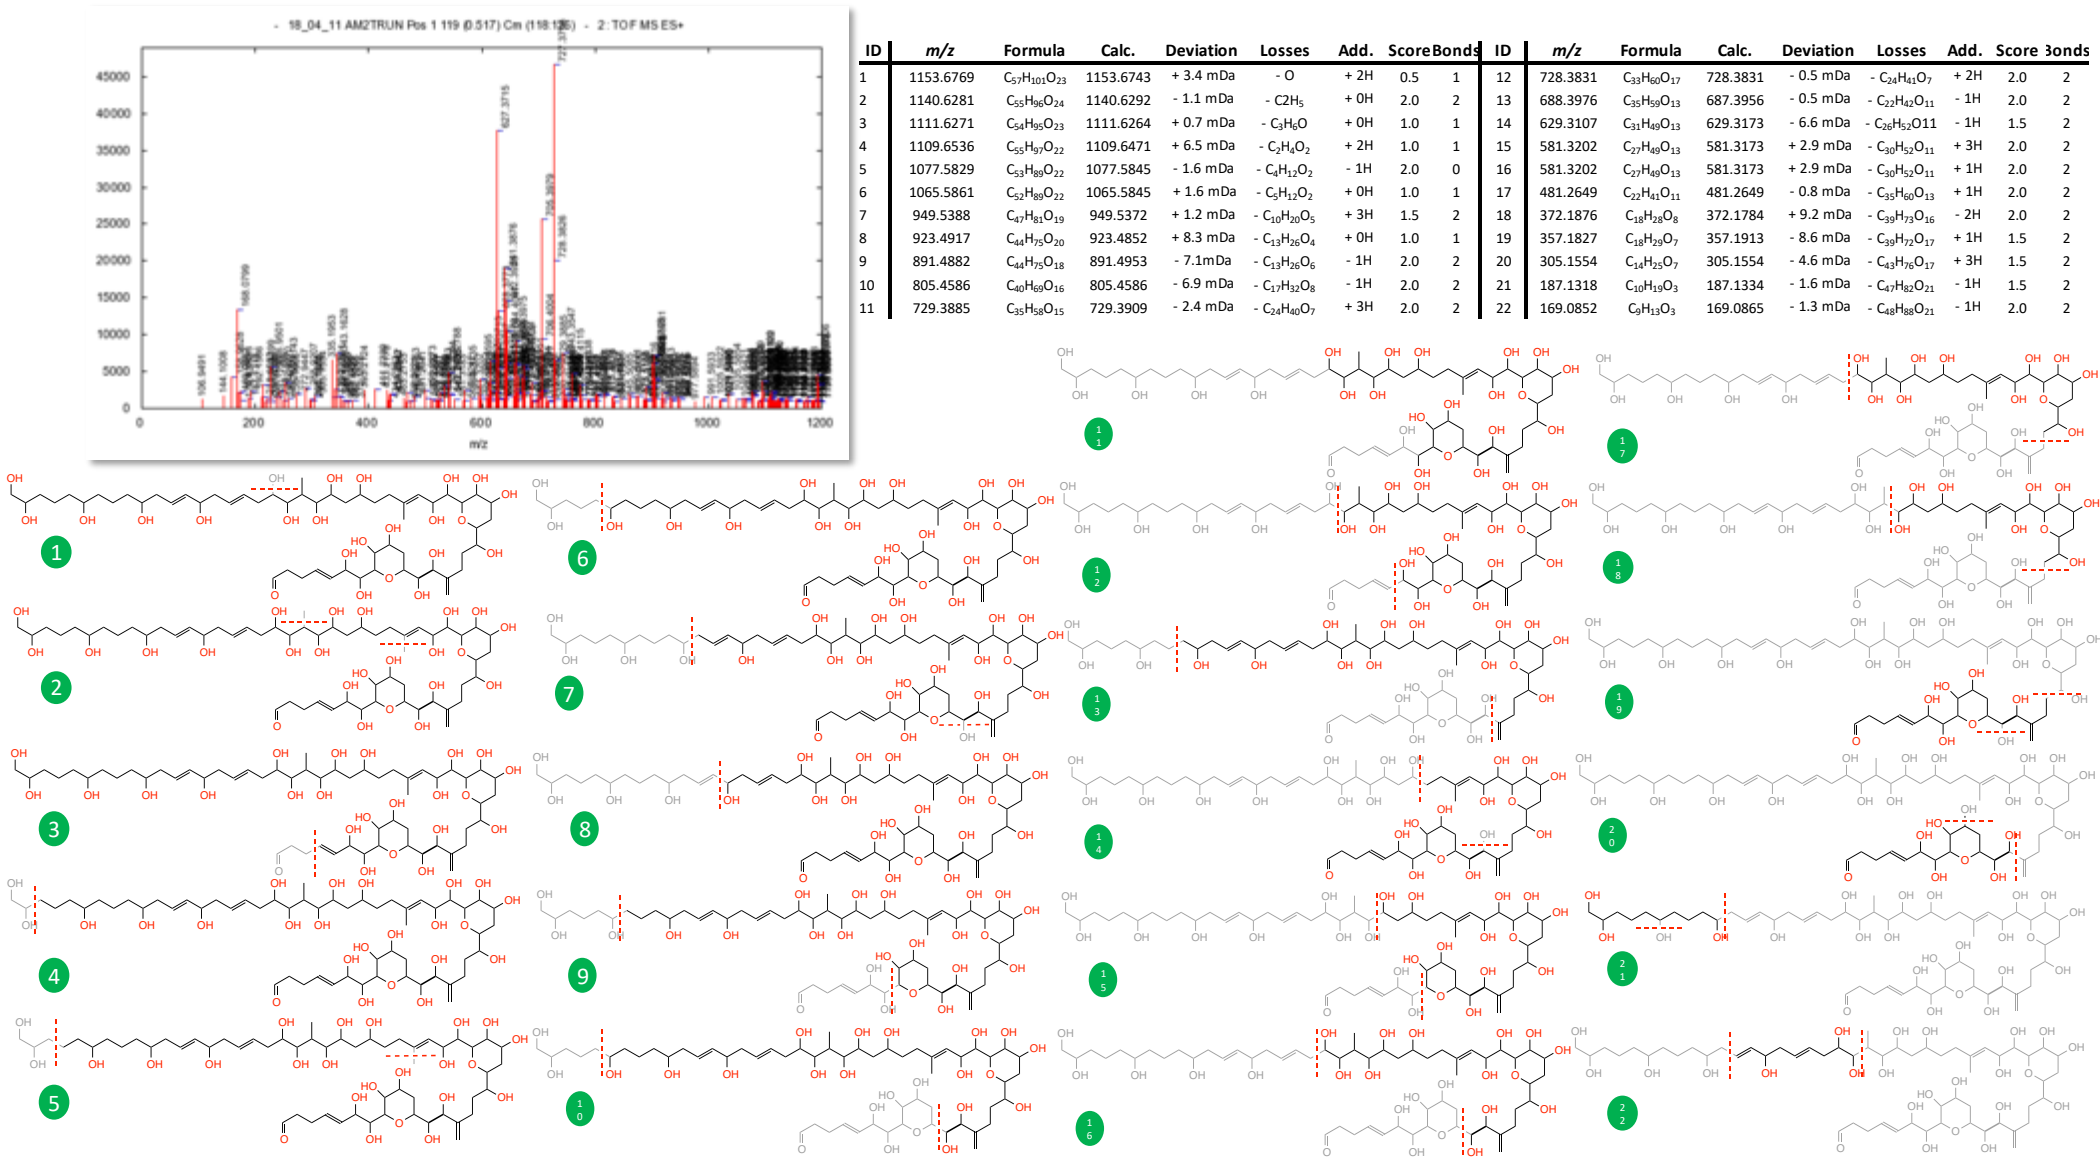

Figure S36.  $^1\text{H}$ -NMR and HSQC<sub>ed</sub> spectra (600 MHz,  $\text{CD}_3\text{OD}$ ) for luteophanol D.

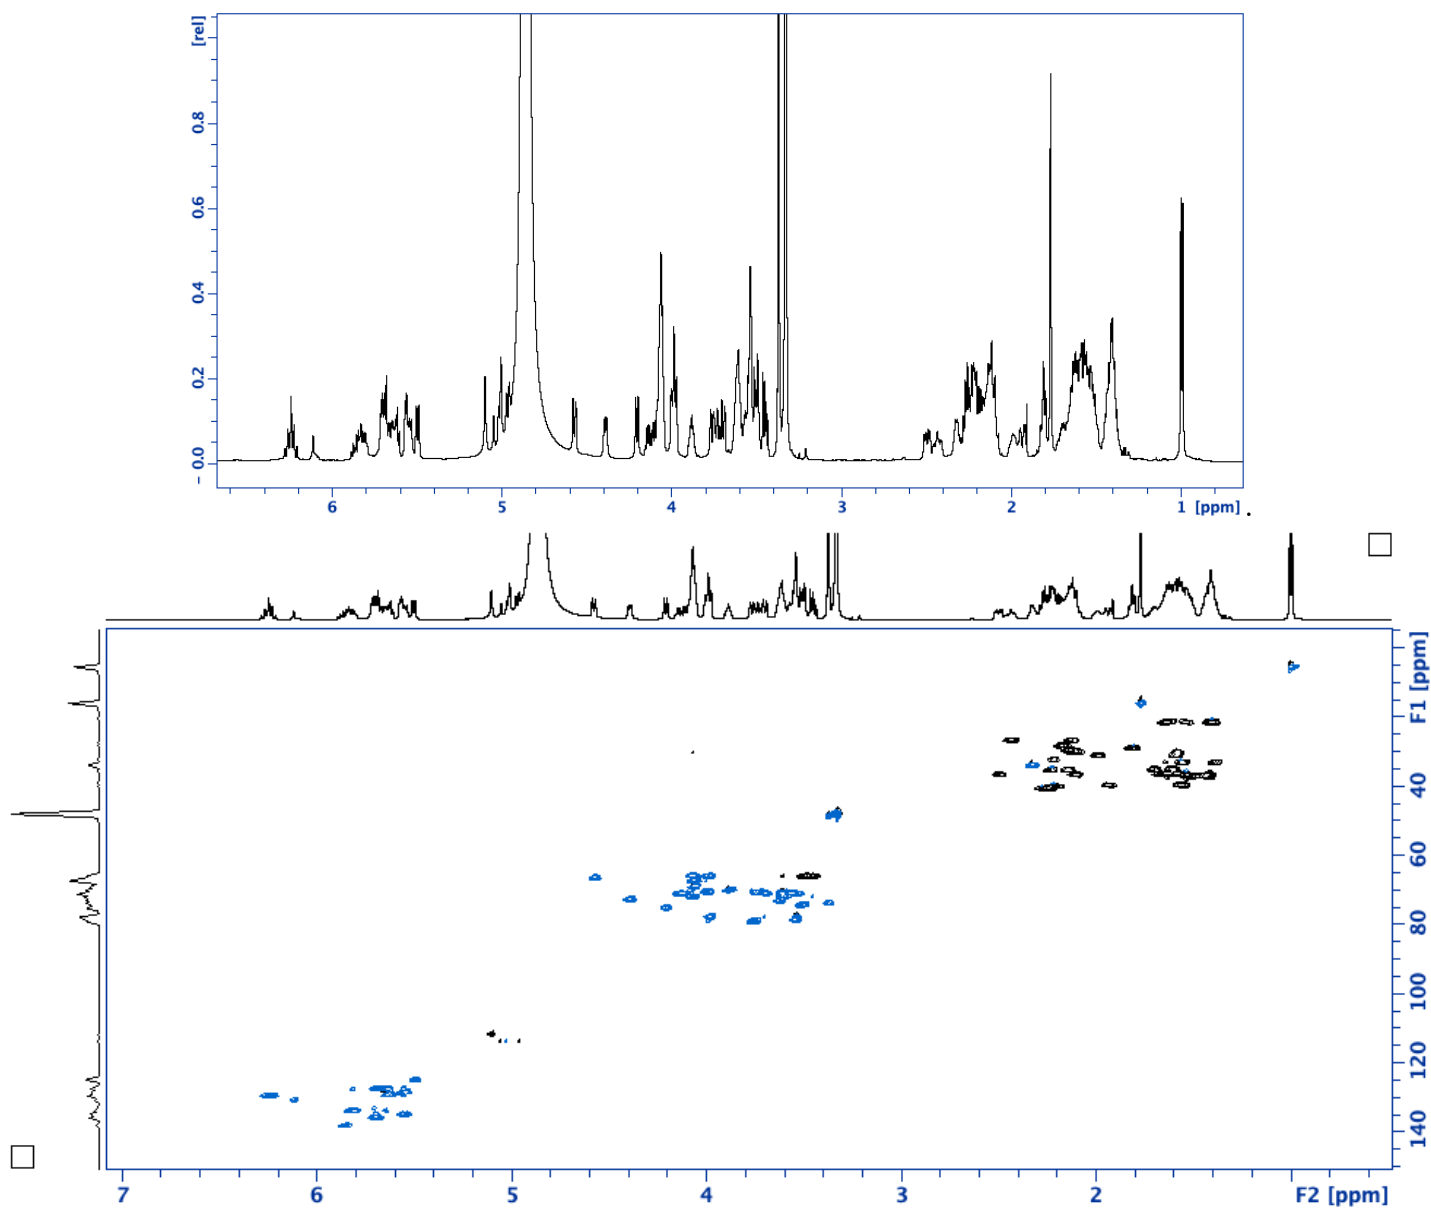

Figure S37. HRESIMS spectrum for luteophanol D.

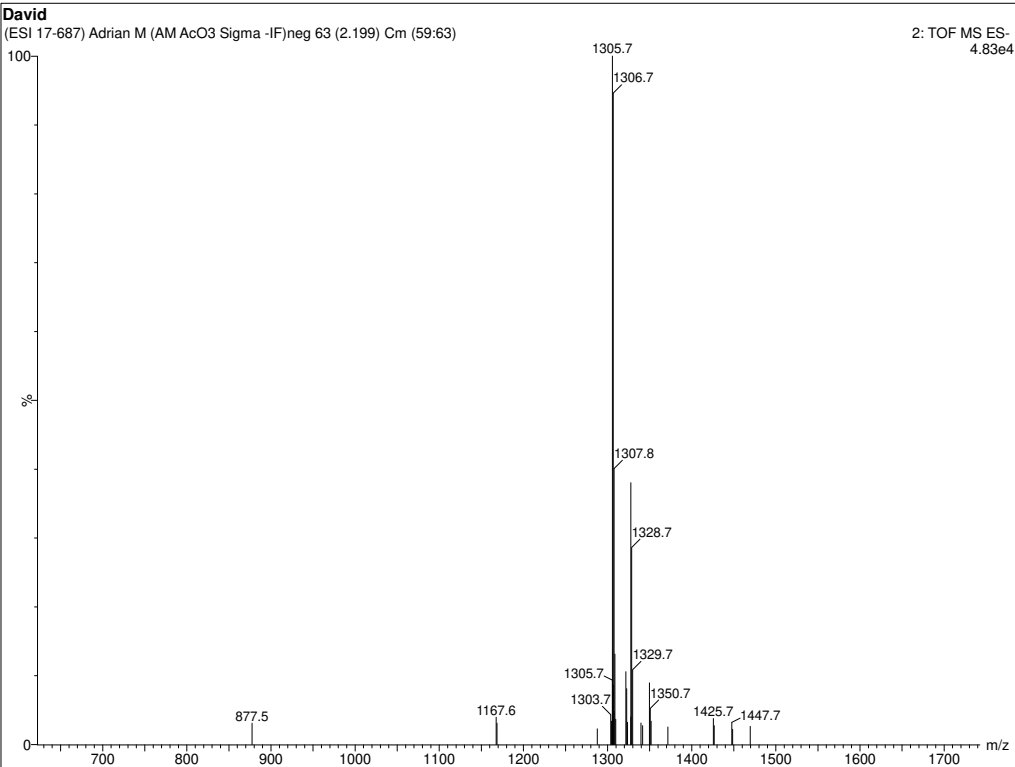

Elemental Composition Report

Page 1

Multiple Mass Analysis: 3 mass(es) processed  
Tolerance = 5.0 PPM / DBE: min = -1.5, max = 100.0  
Element prediction: Off  
Number of isotope peaks used for i-FIT = 3

Monoisotopic Mass, Even Electron Ions  
906 formula(e) evaluated with 9 results within limits (up to 50 best isotopic matches for each mass)  
Elements Used:  
C: 0-80 H: 0-120 O: 0-30 Na: 0-1  
David  
(ESI 17-687) Adrian M (AM AcO3 Sigma -IF)neg 94 (3.279)

2: TOF MS ES-  
5.24e+003

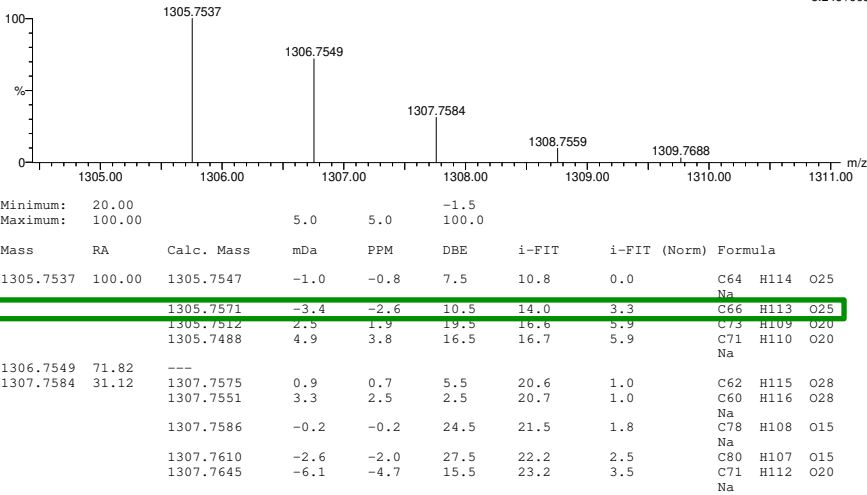



Figure S38.  $^1\text{H}$ -NMR and HSQC<sub>ed</sub> spectra (600 MHz,  $\text{CD}_3\text{OD}$ ) for amphidinol 20B.

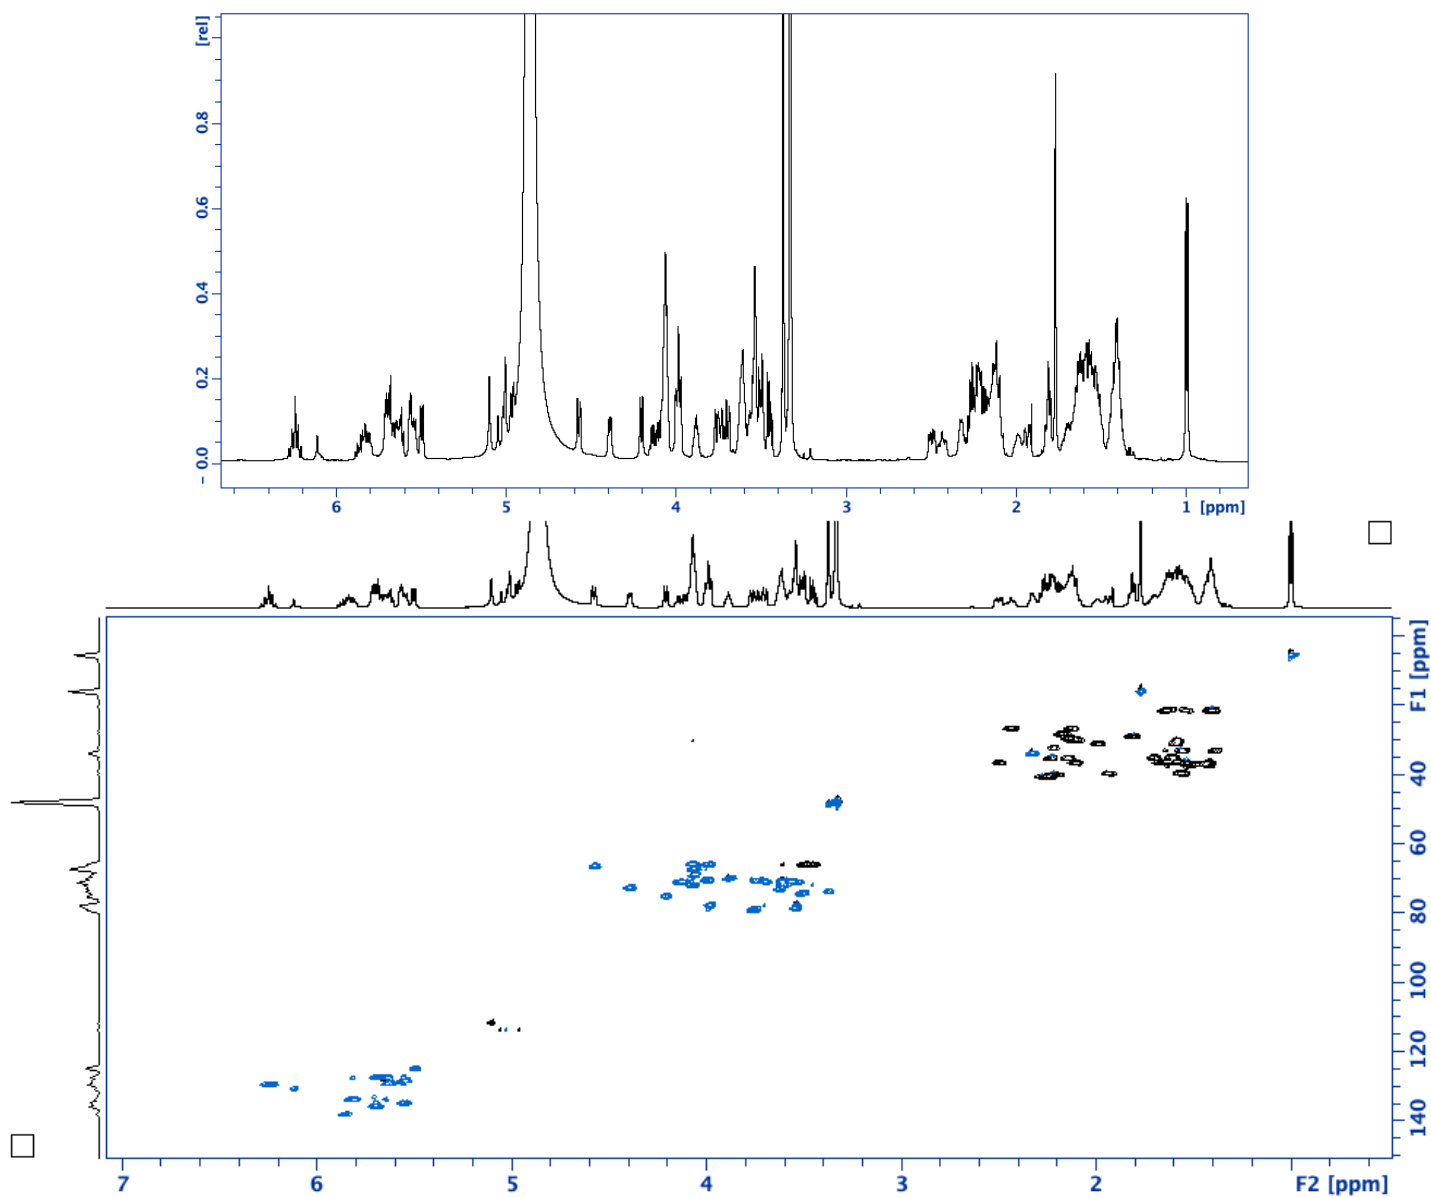

Figure S39. HRESIMS spectrum for amphidinol 20B.

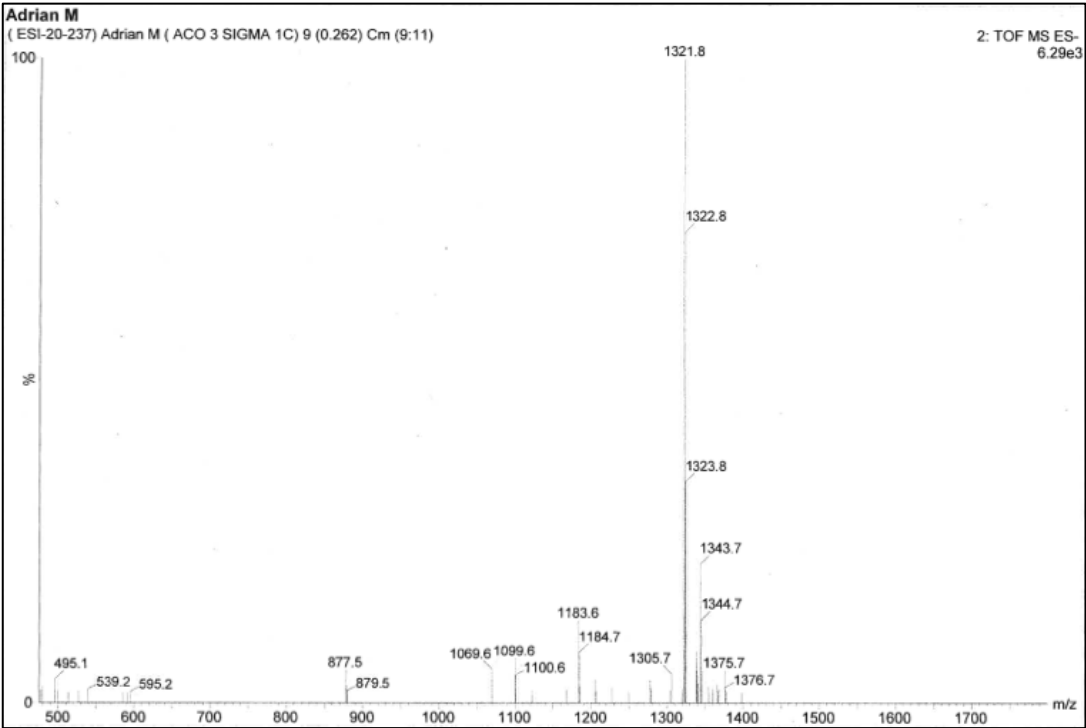

Elemental Composition Report

Page 1

Multiple Mass Analysis: 3 mass(es) processed  
Tolerance = 5.0 PPM / DBE: min = -1.5, max = 100.0  
Element prediction: Off  
Number of isotope peaks used for i-FIT = 3

Monoisotopic Mass, Even Electron Ions  
847 formula(e) evaluated with 8 results within limits (up to 50 best isotopic matches for each mass)  
Elements Used:  
C: 0-80 H: 0-120 O: 0-30 Na: 0-1  
Adrian M  
(ESI-20-237) Adrian M (ACO 3 SIGMA 1C) 34 (1.462)

1: TOF MS ES-  
9.11e+002

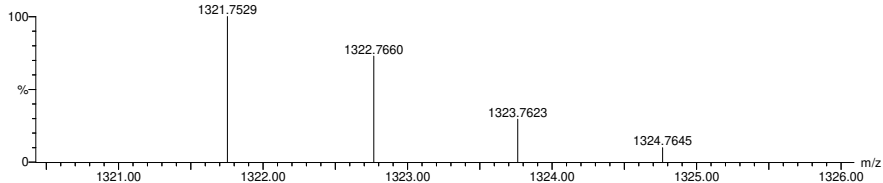

|           |        |            |      |      |       |       |              |              |  |
|-----------|--------|------------|------|------|-------|-------|--------------|--------------|--|
| Minimum:  | 20.00  |            |      |      | -1.5  |       |              |              |  |
| Maximum:  | 100.00 |            | 5.0  | 5.0  | 100.0 |       |              |              |  |
| Mass      | RA     | Calc. Mass | mDa  | PPM  | DBE   | i-FIT | i-FIT (Norm) | Formula      |  |
| 1321.7529 | 100.00 | 1321.7496  | 3.3  | 2.5  | 7.5   | 13.1  | 0.7          | C64 H114 O26 |  |
|           |        | 1321.7520  | 0.9  | 0.7  | 10.5  | 13.2  | 0.8          | C66 H113 O26 |  |
|           |        | 1321.7590  | -6.1 | -4.6 | 20.5  | 15.8  | 3.4          | C75 H110 O18 |  |
|           |        |            |      |      |       |       |              | Na           |  |
| 1322.7660 | 72.80  | ---        |      |      |       |       |              |              |  |
| 1323.7623 | 29.39  | 1323.7653  | -3.0 | -2.3 | 6.5   | 22.9  | 1.5          | C64 H116 O26 |  |
|           |        | 1323.7618  | 0.5  | 0.4  | 18.5  | 23.0  | 1.5          | Na           |  |
|           |        | 1323.7594  | 2.9  | 2.2  | 15.5  | 23.0  | 1.6          | C73 H111 O21 |  |
|           |        |            |      |      |       |       |              | C71 H112 O21 |  |
|           |        |            |      |      |       |       |              | Na           |  |
|           |        | 1323.7677  | -5.4 | -4.1 | 9.5   | 23.1  | 1.6          | C66 H115 O26 |  |
|           |        | 1323.7559  | 6.4  | 4.8  | 27.5  | 23.3  | 1.9          | C80 H107 O16 |  |
